# Supplementary material for: Chemical synthesis of the hexasaccharide related to the repeating unit of the capsular polysaccharide from carbapenem resistant Klebsiella pneumoniae 2796 and 3264
Source: Royal Society of Chemistry journal article supplement (doi:10.1039/c6ra07351d), 2016-01-01
Supplement: c6ra07351d1.pdf [file c6ra07351d1.pdf]

## SUPPORTING INFORMATION

**Chemical synthesis of the hexasaccharide related to the repeating unit of the capsular polysaccharide from carbapenem resistant *Klebsiella pneumoniae* 2796 and 3264**

Vikramjit Sarkar and Balaram Mukhopadhyay

BM-VS-a76 in CDCl3

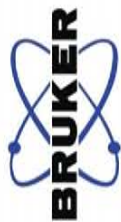

Current Data Parameters  
NAME BM-VS-a76  
EXPNO 20  
PROCNO 1

F2 - Acquisition Parameters  
Date\_ 20140415  
Time 10:49  
INSTRUM spect  
PROBHD 5 mm PABBO B8  
PULPROG zgpg30  
TD 65536  
SOLVENT CDCl3  
NS 14  
DS 2  
SWH 10930.570 Hz  
FIDRES 0.157632 Hz  
AQ 3.171943 sec  
RG 221.6  
CW 487.400 usec  
DE 6.50 usec  
TE 296.8 K  
DI 1.00000000 sec  
TD0 1

===== CHANNEL f1 =====  
NUC1 1H  
P1 14.25 usec  
PL1 1.30 dB  
PL1H 15.30635643 W  
SFO1 500.2030889 MHz  
F2 - Processing parameters  
SI 32768  
SF 500.2000384 MHz  
WDW EM  
SSB 0  
LB 0.30 Hz  
GB 0  
PC 1.00

8.027  
8.013  
8.010  
7.591  
7.576  
7.562  
7.459  
7.444  
7.428  
7.366  
7.350  
7.329  
7.215  
7.210  
7.205  
7.197  
7.191  
7.183  
7.181  
7.170  
7.166  
7.159  
7.155  
7.152  
7.138  
7.112  
7.096  
5.548  
5.437  
5.418  
5.399  
4.651  
4.627  
4.532  
4.508  
4.394  
4.387  
4.381  
4.375  
4.369  
4.362  
4.322  
4.317  
3.912  
3.906  
3.893  
3.887  
2.306  
1.246  
1.233

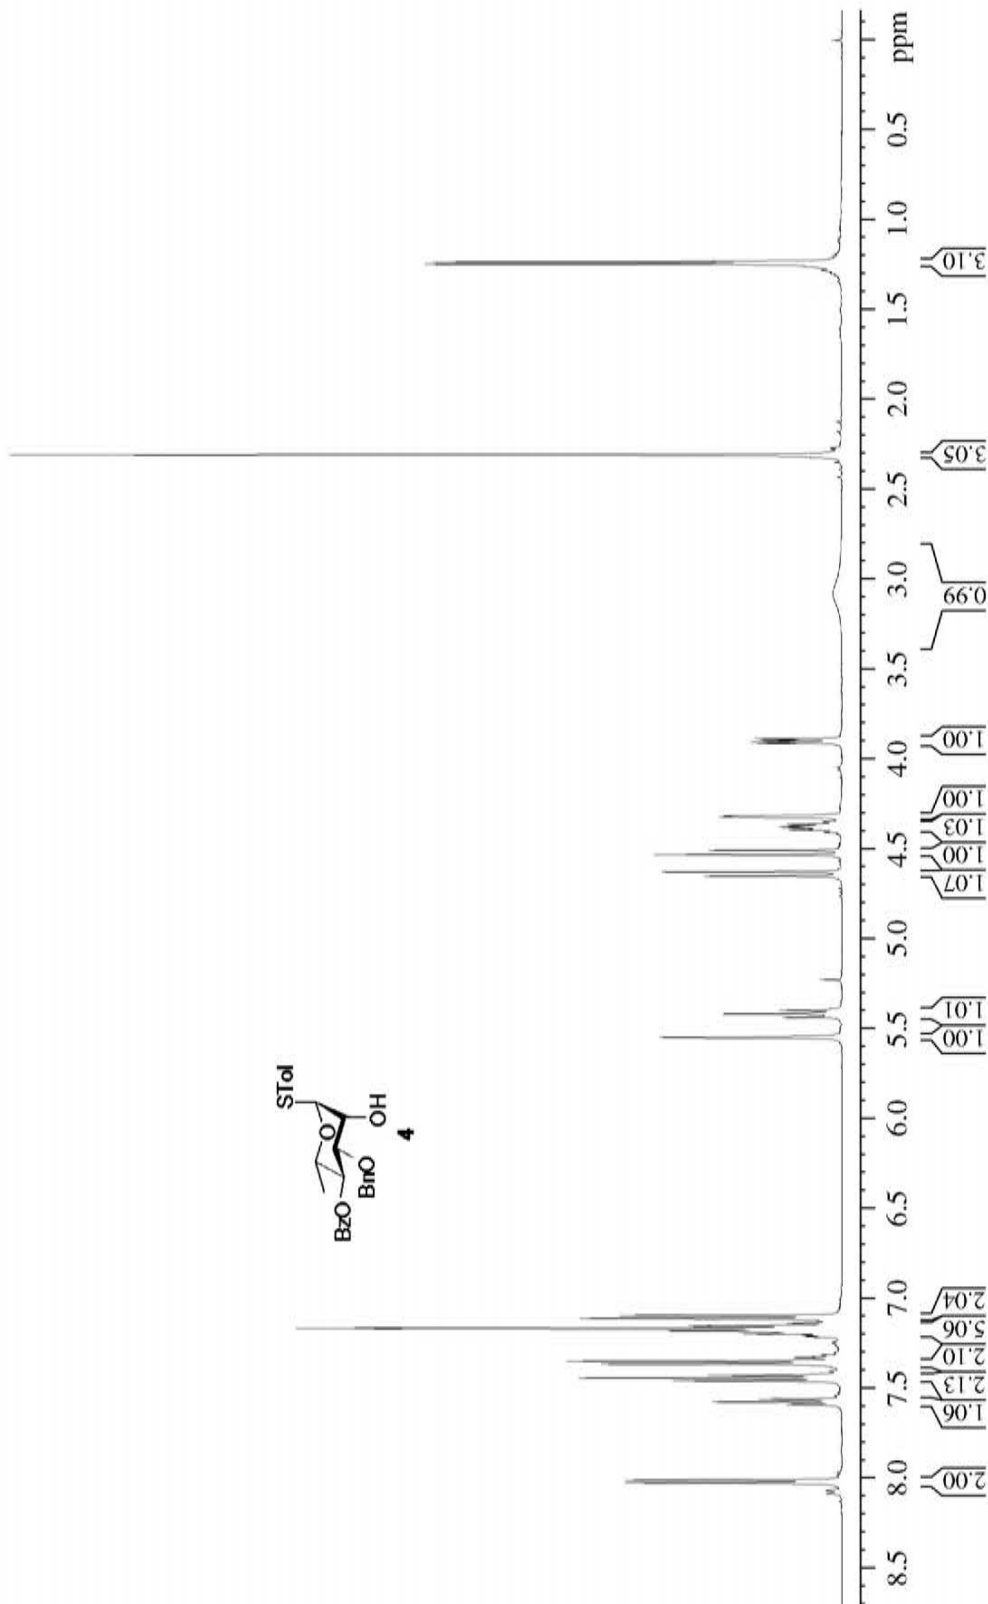

BM-VS-a76 in CDC13

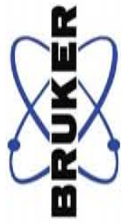

165.87  
137.85  
137.24  
133.34  
132.13  
130.02  
129.93  
128.56  
128.54  
128.09  
128.08

87.43  
77.51  
77.25  
77.00  
76.76  
73.21  
71.72  
69.78  
67.79

21.22  
17.47

Current Data Parameters  
 NAME BM-VS-a76  
 EXPNO 21  
 PROCNO 1  
 F2 - Acquisition Parameters  
 Date\_ 20140415  
 Time 10.52  
 INSTRUM spect  
 PROBHD 5 mm PABBO BB-  
 PULPROG zgpg30  
 ID 65336  
 SOLVENT CDC13  
 NS 59  
 DS 4  
 SWH 29761.904 Hz  
 FIDRES 0.456131 Hz  
 AQ 1.1010048 sec  
 RG 203  
 DW 16.890 usec  
 DE 29.58 usec  
 TE 297.2 K  
 D1 2.00000000 sec  
 D11 0.03000000 sec  
 TD0 1  
 CHANNEL f1  
 NUC1 13C  
 P1 9.50 usec  
 PL1 -0.50 dB  
 PL1W 90.1882531 W  
 SF01 125.7879676 MHz  
 CHANNEL f2  
 CPDPRG2 waltz16  
 NUC2 1H  
 NUC2 80.00 usec  
 PCPD2 1.30 dB  
 PL2 16.00 dB  
 PL12 20.00 dB  
 PL13 15.30635643 W  
 PL1W 0.51864596 W  
 PL12W 0.20687706 W  
 PL13W 500.2020008 MHz  
 SF02  
 F2 - Processing parameters  
 SI 32768  
 SF 125.7753660 MHz  
 WDW EM  
 SSB 0  
 LB 1.00 Hz  
 GB 0  
 PC 1.40

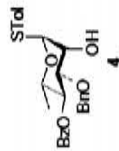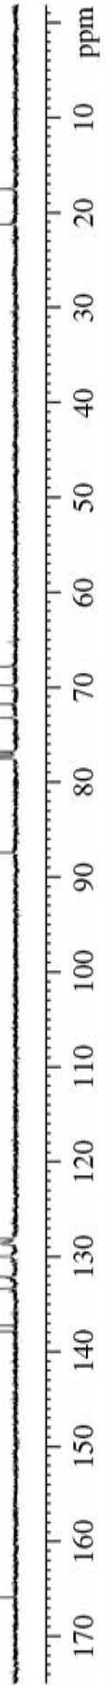

BM-VS-a77 in CDCl3

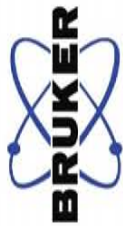

7.479  
7.476  
7.393  
7.390  
7.377  
7.229  
7.221  
7.212  
7.170  
7.161  
7.151  
5.744  
5.741  
5.738  
5.735  
5.453  
5.450  
5.383  
5.364  
5.344  
4.664  
4.639  
4.483  
4.458  
4.448  
4.436  
4.429  
4.416  
4.255  
4.224  
4.209  
4.178  
3.997  
3.991  
3.978  
3.971  
2.353  
1.300  
1.288

Current Data Parameters  
Name BM-VS-a77  
EXPNO 10  
PROCNO 1

F2 - Acquisition Parameters  
Date\_ 2010015  
Time 10.25  
INSTRUM spect  
PROBHD 5 mm PABBO  
PULPROG zgpg30  
TD 65536  
SOLVENT CDCl3  
NS 16  
DS 2  
SWH 10330.878 Hz  
FIDRES 0.157632 Hz  
AQ 3.177842 sec  
RG 322  
DW 48.400 usec  
DE 6.50 usec  
TE 296.4 K  
D1 1.00000000 sec  
TD0 1

===== CHANNEL f1 =====  
NUC1 1H  
PU 14.25 usec  
PL1 1.30 dB  
PL1M 15.30635643 W  
SFO1 500.2030889 MHz

F2 - Processing parameters  
SI 32768  
SF 500.2030889 MHz  
WDW EM  
SSB 0  
LB 0.30 Hz  
GB 0  
PC 1.00

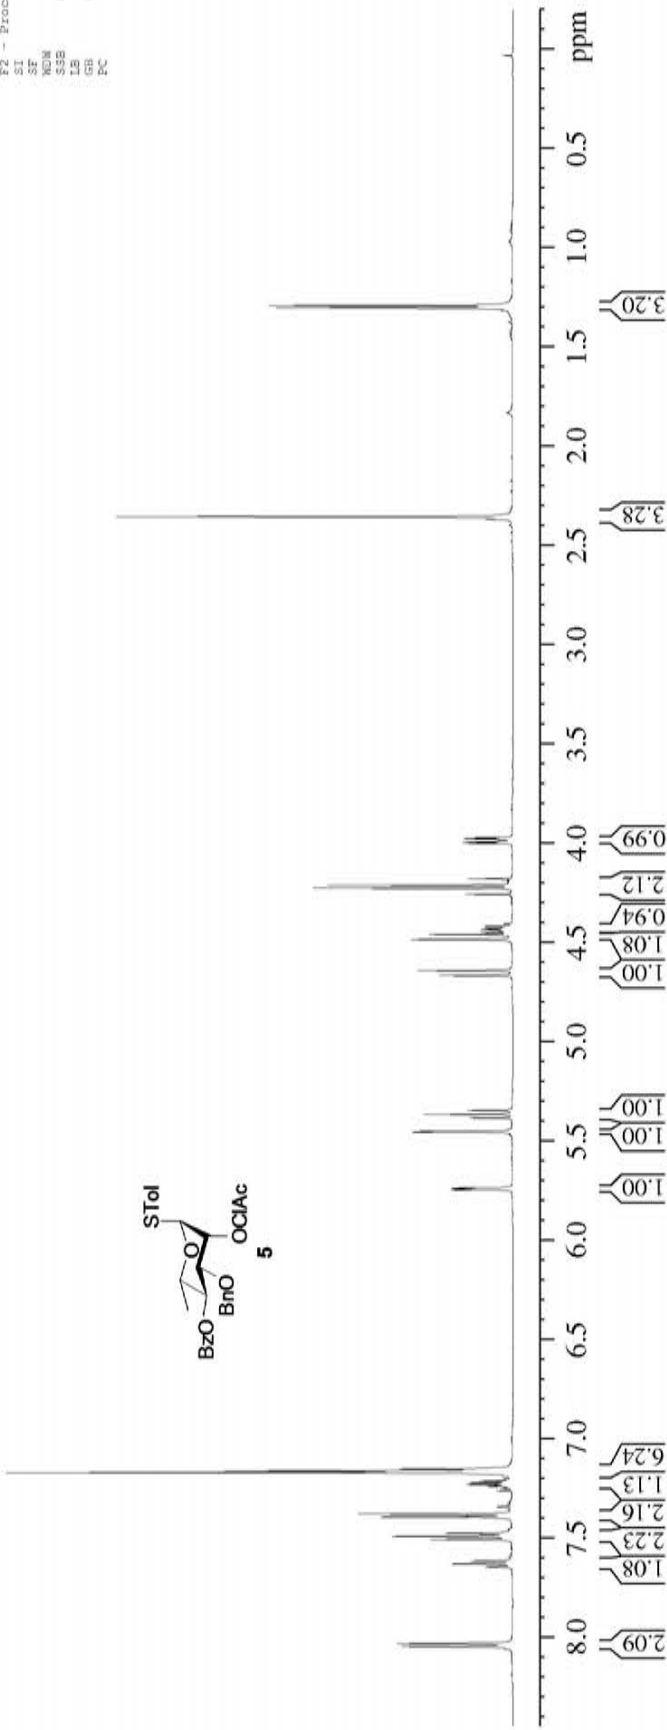

BM-VS-a77 in CDC13

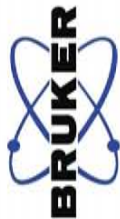

166.73  
165.51

138.31  
136.87  
133.21  
132.41  
129.96  
129.78  
129.52  
129.17  
128.33  
128.28  
128.03  
127.81

86.10  
77.25  
77.00  
76.75  
74.20  
72.66  
71.81  
71.31  
67.92

40.81

21.04

17.30

Current Data Parameters  
 NAME BM-VS-a77  
 EXPNO 11  
 PROCNO 1

F2 - Acquisition Parameters  
 Date\_ 20140415  
 Time 10.27  
 INSTRUM spect  
 PROBRD 5 mm PABBO BB-  
 PULPROG zgpg30  
 TD 65536  
 SOLVENT CDC13  
 NS 67  
 DS 4  
 SWH 29761.904 Hz  
 FIDRES 0.454131 Hz  
 AQ 1.1010048 sec  
 RG 203  
 DW 16.800 usec  
 DE 6.50 usec  
 TE 297.2 K  
 D1 2.00000000 sec  
 D11 0.03000000 sec  
 TD0 1

===== CHANNEL f1 =====  
 NUC1 13C  
 P1 9.50 usec  
 PL1 -0.50 dB  
 PL1W 90.18825331 W  
 SFO1 125.7819676 MHz

===== CHANNEL f2 =====  
 CPDPRG12 waitz16  
 NUC2 1H  
 P2 80.00 usec  
 PL2 1.50 dB  
 PL2W 16.00 dB  
 PL13 16.00 dB  
 PL14 15.30623643 W  
 PL15W 0.31816166 W  
 PL16W 0.20647706 W  
 SFO2 500.2020008 MHz

F2 - Processing parameters  
 SI 32768  
 SF 125.7754105 MHz  
 SSB 0 EM  
 LB 0  
 GB 0  
 EC 1.40

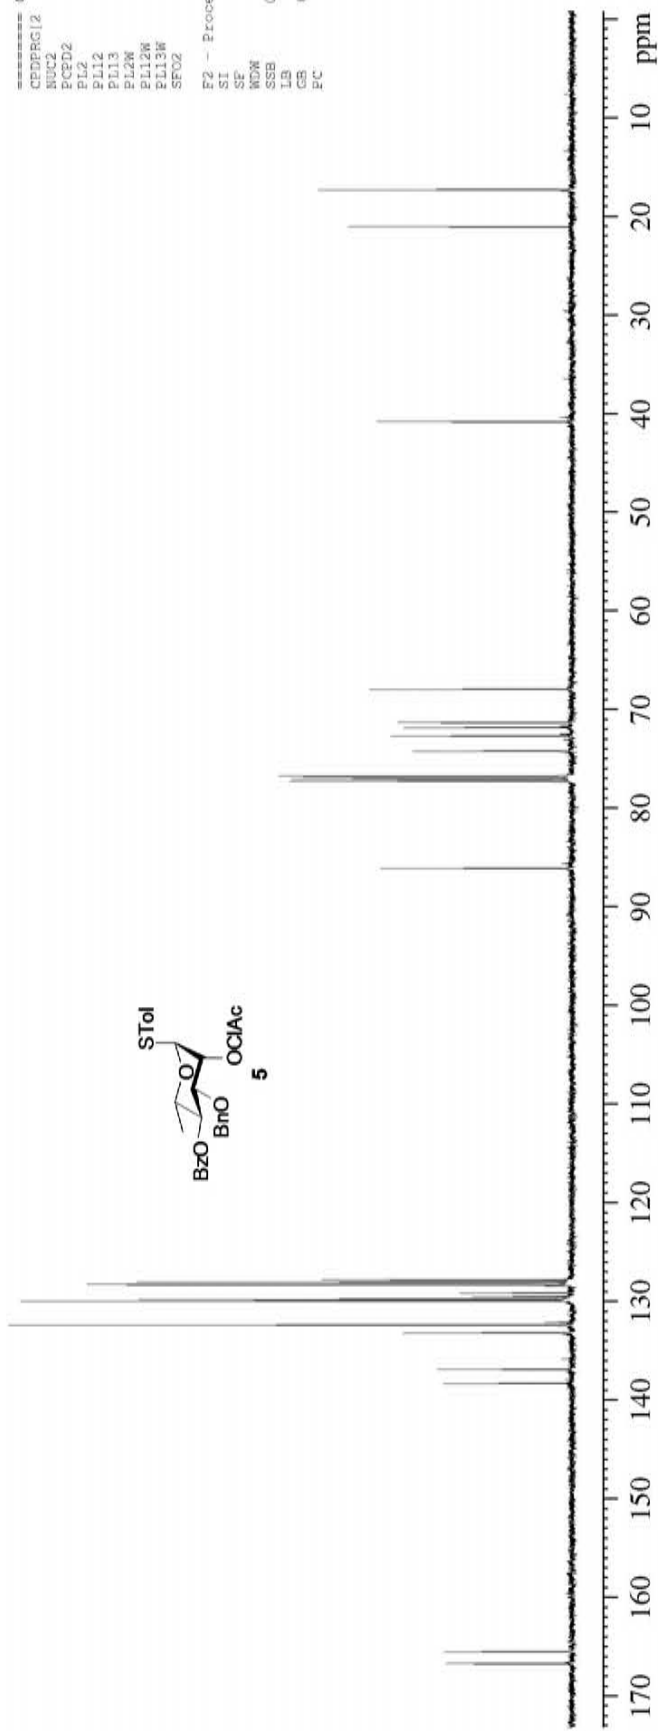

BM-VS-s14 in CDCl3

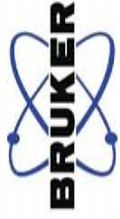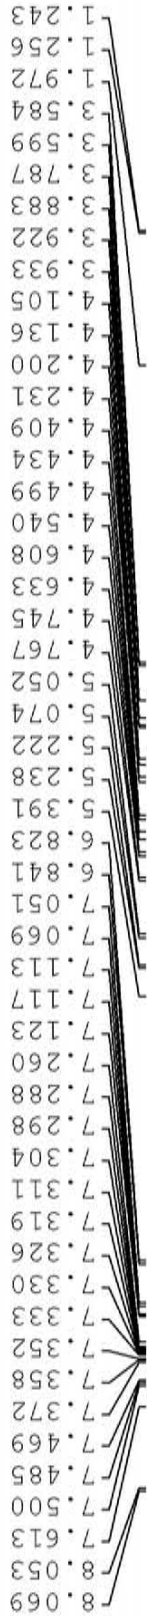

Current Data Parameters  
NAME BM-VS-s14  
EXPNO 50  
PROCNO 1

F2 - Acquisition Parameters  
Date\_ 20140611  
Time 15:21  
INSTRUM spect  
PROBHD 5 mm PABBO BB-CP  
PULPROG zgpg30  
TD 65536  
SOLVENT CDCl3  
NS 16  
DS 2  
SWH 10330.578 Hz  
FIDRES 0.157632 Hz  
AQ 3.1719423 sec  
RG 45.2  
DM 48.400 usec  
DE 300.0 usec  
TE 300.2 K  
D1 1.00000000 sec  
TD0 1

===== CHANNEL f1 =====  
NUC1 1H  
P1 14.23 usec  
PL1 1.30 dB  
FLLW 15.30635643 W  
SFO1 500.2030889 MHz

F2 - Processing parameters  
SI 32768  
SF 500.2000146 MHz  
RG 4096  
SSB 0  
LB 0.30 Hz  
GB 0  
PC 1.00

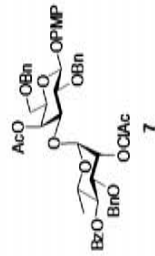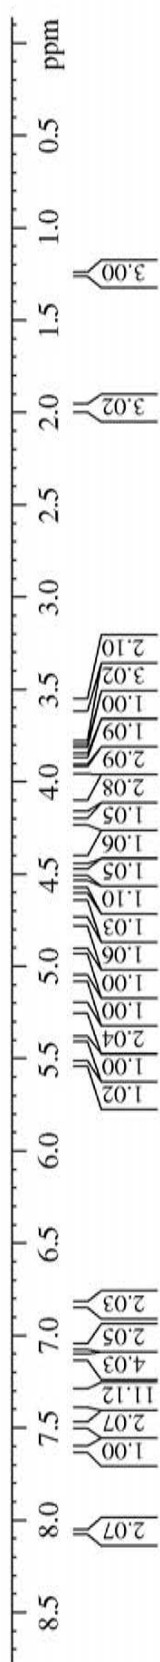

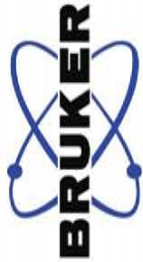

BM-VS-s14 in CDC13  
HSQC

169.93  
166.65  
165.63  
155.45  
151.17  
137.64  
137.58  
137.37  
133.13  
129.91  
129.77  
128.52  
128.50  
128.38  
128.36  
128.20  
128.01  
127.79  
127.74  
127.60  
118.24  
114.61  
102.91  
98.53  
79.09  
77.25  
77.00  
76.74  
75.16  
74.72  
73.67  
73.51  
72.76  
72.58  
71.12  
69.91  
69.19  
68.20  
67.31  
55.60  
40.86  
20.60  
17.59

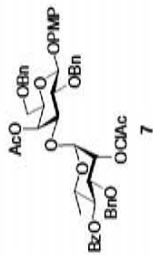

Current Data Parameters  
NAME BM-VS-s14  
EXPNO 53  
PROCNO 1

F2 - Acquisition Parameters  
Date\_ 20140811  
Time 15:31  
INSTRUM spect  
PROBHD 5 mm PABBO-BS-  
PULPROG zgpg30  
TD 65536  
SOLVENT CDC13  
NS 682  
DS 4  
SWH 29761.904 Hz  
FIDRES 0.454131 Hz  
AQ 1.1010048 sec  
RG 203  
DM 16.800 usec  
DE 6.50 usec  
TE 302.1 K  
D1 2.0000000 sec  
D11 0.0300000 sec  
TD0 1

CHANNEL f1  
NUC1 13C  
P1 9.50 usec  
PL1 -0.50 dB  
PL1W 90.18825331 MHz  
SFO1 125.7879876 MHz

CHANNEL f2  
CPDPRG12 waltz16  
NUC2 1H  
PCPD2 80.00 usec  
PL2 1.30 dB  
PL12 16.00 dB  
PL13 20.00 dB  
PL14 20.00 dB  
PL15 15.30635643 W  
PL12W 0.51864696 W  
PL13W 0.20647706 W  
SFO2 500.2020008 MHz

F2 - Processing parameters  
SI 32768  
SF 125.7753987 MHz  
AQ 1.1010048 sec  
RG 203  
DM 16.800 usec  
DE 6.50 usec  
TE 302.1 K  
D1 2.0000000 sec  
D11 0.0300000 sec  
TD0 1

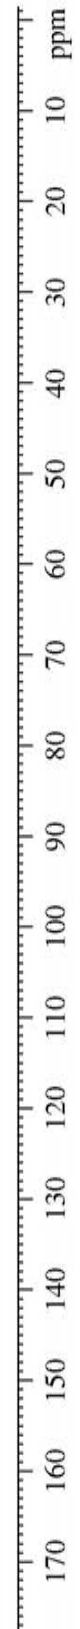

BM-VS-s14 in CDCl3

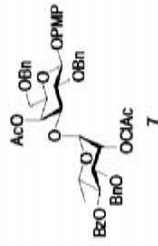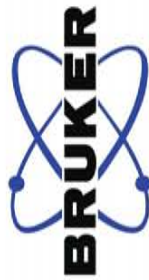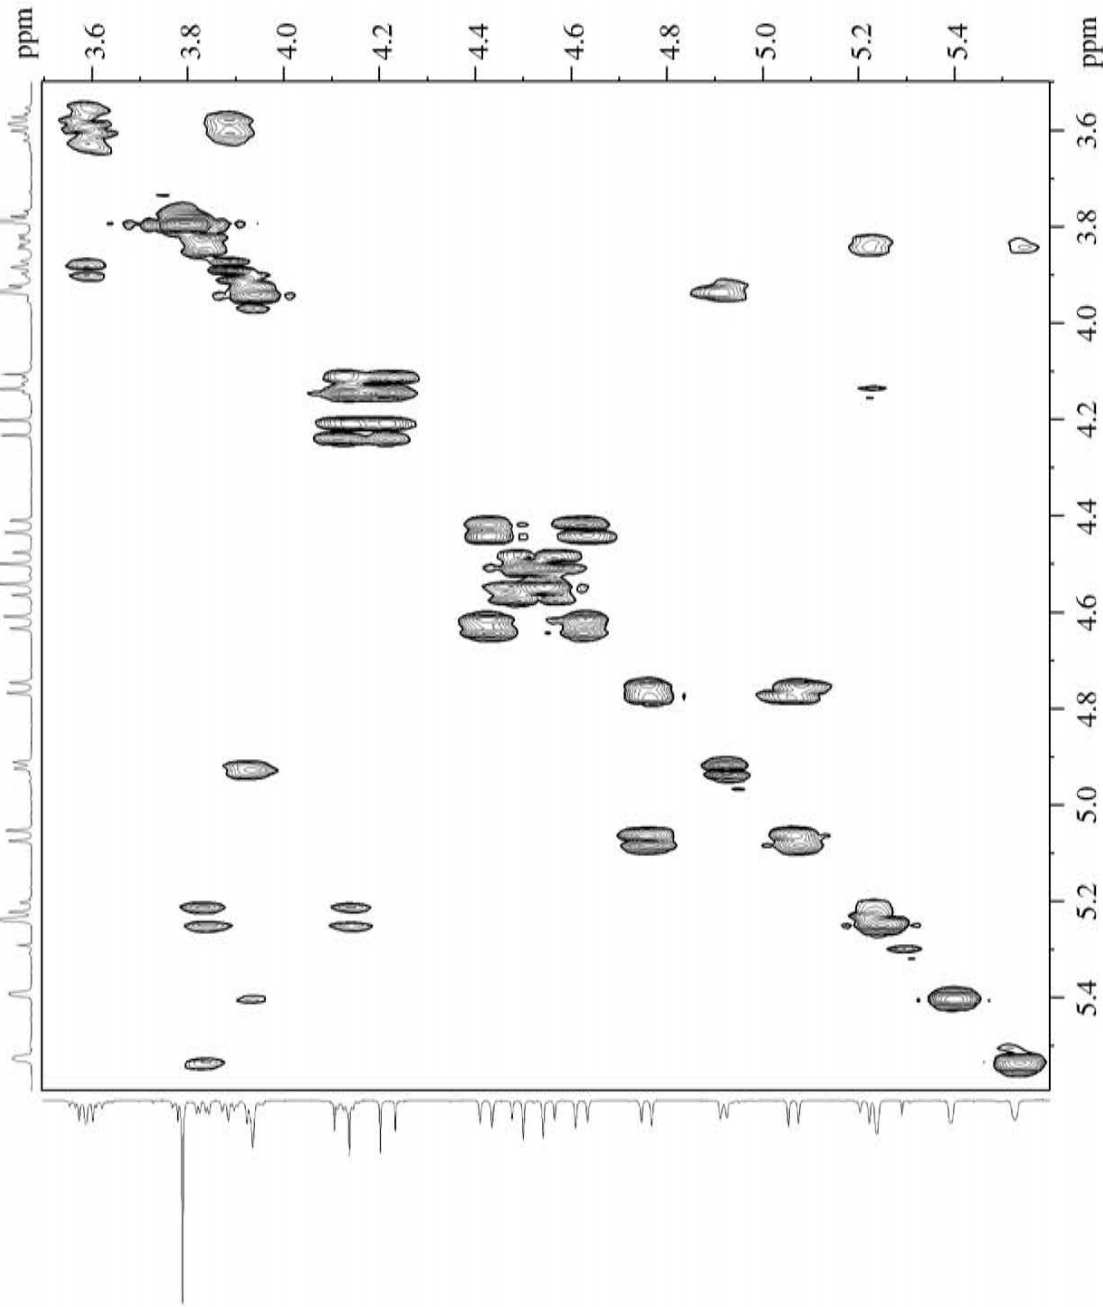

Current Data Parameters  
NAME BM-VS-s14  
EXNO 51  
PROCNO 1

F2 - Acquisition Parameters  
Date\_ 20140811  
Time 13.23  
INSTRUM spect  
PROBHD 5 mm PABBO BB-  
PULPROG cosyypqi  
ID 2048  
SOLVENT CDCl3  
NS 1  
DS 8  
SWH 5000.000 Hz  
FIDRES 2.441406 Hz  
AQ 0.2048000 sec  
RG 45.2  
DW 100.000 usec  
DE 6.50 usec  
TE 300.2 K  
D0 0.00000300 sec  
D1 1.4868198 sec  
D13 0.00000400 sec  
D16 0.00020000 sec  
INO 0.00019990 sec

CHANNEL f1  
NUC1 1H  
P0 14.25 usec  
P1 14.25 usec  
PL1 1.30 dB  
PL1W 15.30635643 W  
SFO1 500.2025010 MHz

GRADIENT CHANNEL  
GENM[1] SINE.100  
GrZ1 10.00 %  
P16 1000.00 usec

F1 - Acquisition parameters  
ID 128  
SFO1 500.2025 MHz  
FIDRES 39.078320 Hz  
SW 10.000 ppm  
PRMODE QF

F2 - Processing parameters  
SI 1024  
SF 500.2000129 MHz  
WDW SINE  
SSB 0  
LB 0 Hz  
GB 0  
PC 1.00

F1 - Processing parameters  
SI 1024  
MC2 QF  
SF 500.2000157 MHz  
SSB 0  
SINE  
IDB 0 Hz  
CB 0



BM-VS-s14 in CDC13  
HSQC

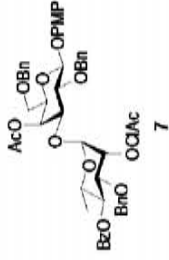

```

Current Data Parameters
NAME      BM-VS-s14
EXPNO    52
PROCNO   1
Date_    20140811
Time     15:27
INSTRUM  spect
PROBHD   5 mm PABBO-BE
PULPROG  zgpg30
TD       1024
SOLVENT  CDCl3
DS       16
SHE      5000.000 Hz
NUC1      13C
NUC2      13C
RG        0.1024000
AQ        85.2
RM        0.1024000
DS        16
SW        300.000 usac
TE        301.0 K
CH212    145.0000000
D0        0.0000000 sec
D1        0.0000000 sec
D2        0.0000000 sec
D3        0.0000000 sec
D4        0.0000000 sec
D5        0.0000000 sec
D6        0.0000000 sec
D7        0.0000000 sec
D8        0.0000000 sec
D9        0.0000000 sec
D10       0.0000000 sec
D11       0.0000000 sec
D12       0.0000000 sec
D13       0.0000000 sec
D14       0.0000000 sec
D15       0.0000000 sec
D16       0.0000000 sec
D17       0.0000000 sec
D18       0.0000000 sec
D19       0.0000000 sec
D20       0.0000000 sec
===== CHANNEL f1 =====
NUC1      13C
P1        14.25 usac
PC        25.00 usac
PR        1.10
P2        19.00 usac
PC        25.00 usac
PR        1.10
P3        19.00 usac
PC        25.00 usac
PR        1.10
P4        19.00 usac
PC        25.00 usac
PR        1.10
P5        19.00 usac
PC        25.00 usac
PR        1.10
P6        19.00 usac
PC        25.00 usac
PR        1.10
P7        19.00 usac
PC        25.00 usac
PR        1.10
P8        19.00 usac
PC        25.00 usac
PR        1.10
P9        19.00 usac
PC        25.00 usac
PR        1.10
P10       19.00 usac
PC        25.00 usac
PR        1.10
P11       19.00 usac
PC        25.00 usac
PR        1.10
P12       19.00 usac
PC        25.00 usac
PR        1.10
P13       19.00 usac
PC        25.00 usac
PR        1.10
P14       19.00 usac
PC        25.00 usac
PR        1.10
P15       19.00 usac
PC        25.00 usac
PR        1.10
P16       19.00 usac
PC        25.00 usac
PR        1.10
P17       19.00 usac
PC        25.00 usac
PR        1.10
P18       19.00 usac
PC        25.00 usac
PR        1.10
P19       19.00 usac
PC        25.00 usac
PR        1.10
P20       19.00 usac
PC        25.00 usac
PR        1.10
===== CHANNEL f2 =====
CPDPRG2  garp
NUC1      13C
P1        3.00 usac
PC        3.00 usac
PR        1.10
P2        3.00 usac
PC        3.00 usac
PR        1.10
P3        3.00 usac
PC        3.00 usac
PR        1.10
P4        3.00 usac
PC        3.00 usac
PR        1.10
P5        3.00 usac
PC        3.00 usac
PR        1.10
P6        3.00 usac
PC        3.00 usac
PR        1.10
P7        3.00 usac
PC        3.00 usac
PR        1.10
P8        3.00 usac
PC        3.00 usac
PR        1.10
P9        3.00 usac
PC        3.00 usac
PR        1.10
P10       3.00 usac
PC        3.00 usac
PR        1.10
P11       3.00 usac
PC        3.00 usac
PR        1.10
P12       3.00 usac
PC        3.00 usac
PR        1.10
P13       3.00 usac
PC        3.00 usac
PR        1.10
P14       3.00 usac
PC        3.00 usac
PR        1.10
P15       3.00 usac
PC        3.00 usac
PR        1.10
P16       3.00 usac
PC        3.00 usac
PR        1.10
P17       3.00 usac
PC        3.00 usac
PR        1.10
P18       3.00 usac
PC        3.00 usac
PR        1.10
P19       3.00 usac
PC        3.00 usac
PR        1.10
P20       3.00 usac
PC        3.00 usac
PR        1.10
===== GRABBLE CHANNEL =====
GPRGM11  SINE-100
GPRGM12  SINE-100
GPRGM13  SINE-100
GPRGM14  SINE-100
GPRGM15  SINE-100
GPRGM16  SINE-100
GPRGM17  SINE-100
GPRGM18  SINE-100
GPRGM19  SINE-100
GPRGM20  SINE-100
===== Acquisition parameters =====
SI       1024
SF       500.1364600 MHz
WDW      EM
SSB      0
GB        0
PC        1.00
===== Processing parameters =====
SI       1024
SF       500.1364600 MHz
WDW      EM
SSB      0
GB        0
PC        1.00

```

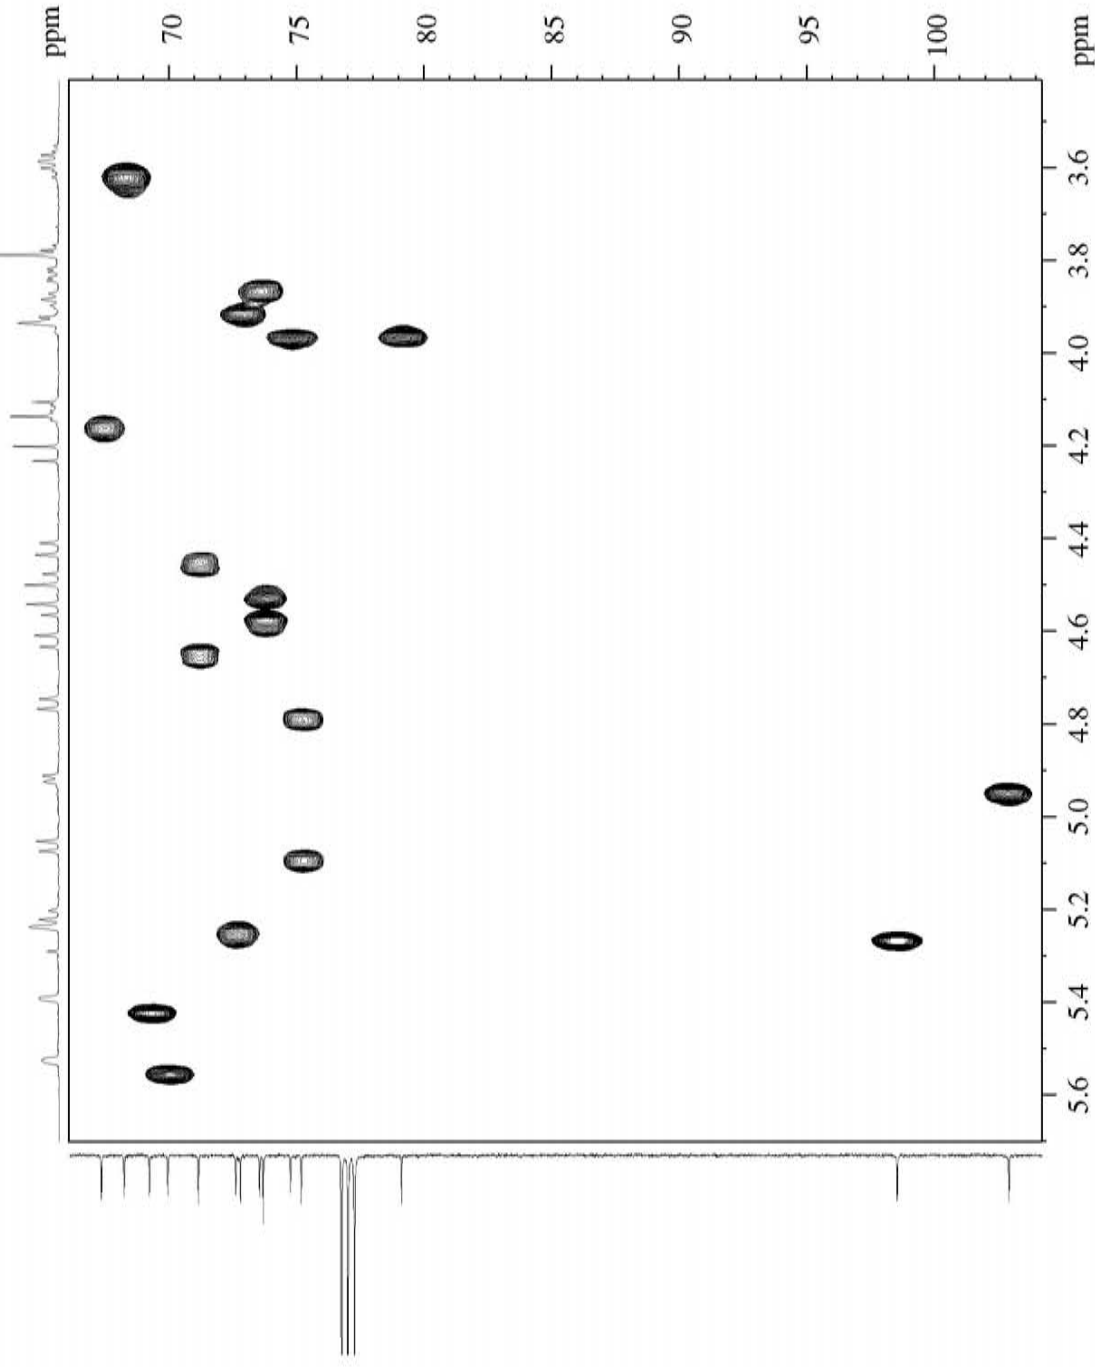

BM-VS-s15 in CDCl3

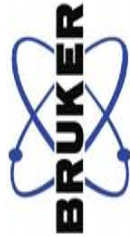

8.099  
8.083  
7.611  
7.596  
7.504  
7.488  
7.473  
7.390  
7.380  
7.339  
7.328  
7.319  
7.315  
7.310  
7.293  
7.215  
7.206  
7.199  
7.181  
7.173  
7.080  
7.063  
6.841  
6.823  
5.420  
5.302  
5.051  
5.029  
4.937  
4.922  
4.797  
4.775  
4.627  
4.602  
4.576  
4.553  
4.515  
4.507  
4.492  
4.483  
3.952  
3.922  
3.903  
3.891  
3.785  
3.778  
3.608  
3.596  
2.031  
1.265  
1.252

Current Data Parameters  
 NAME BM-VS-s15  
 EXPNO 50  
 PROCNO 1  
 F2 - Acquisition Parameters  
 Date\_ 20140814  
 Time 13:48  
 INSTRUM spect  
 PROSHD 5 mm PABBO BB-  
 PULPROG zg30  
 TD 65536  
 SOLVENT CDCl3  
 NS 16  
 DS 2  
 SWH 10330.578 Hz  
 FIDRES 0.157652 Hz  
 AQ 3.1719425 sec  
 RG 32  
 DW 48.400 usec  
 DE 6.50 usec  
 FE 501.5 K  
 FI 1.00000000 sec  
 TD0 1  
 ===== CHANNEL f1 =====  
 NUC1 1H  
 P1 14.25 usec  
 PL1 1.30 dB  
 PL1W 15.30635643 W  
 SP01 500.2030889 MHz  
 F2 - Processing parameters  
 SI 32768  
 SF 500.2000163 MHz  
 WDW EM  
 SSB 0  
 LB 0.30 Hz  
 GB 0  
 PC 1.00

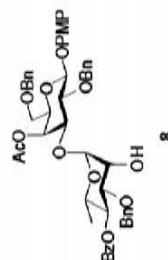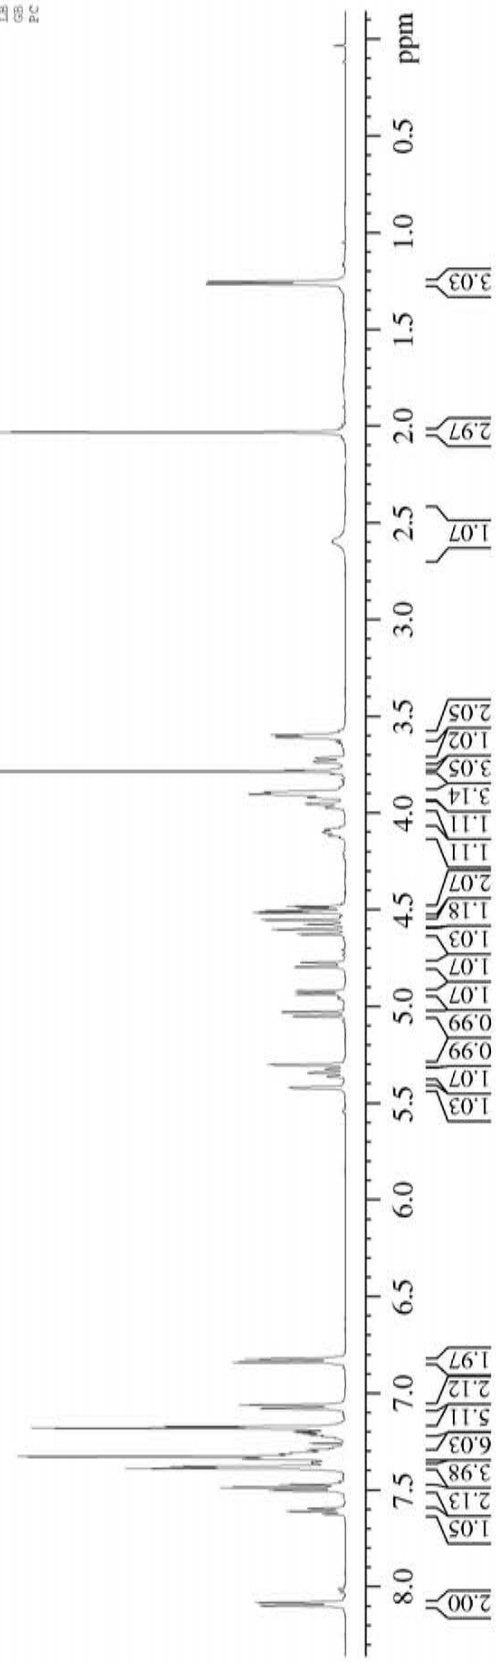

BM-VS-s15 in CDCl3

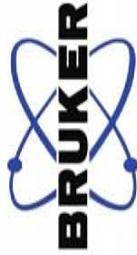

169.88  
165.71  
155.37  
151.26  
137.85  
137.69  
137.43  
133.02  
129.93  
129.80  
128.44  
128.32  
128.29  
128.27  
127.84  
127.74  
127.71  
127.70  
127.63  
118.29  
114.53  
102.94  
100.57  
79.02  
77.25  
77.00  
76.75  
75.80  
75.44  
75.01  
73.58  
72.88  
72.80  
71.26  
69.57  
68.35  
68.17  
66.88  
55.55

```

Current Data Parameters
NAME      EM-VS-s15
EXPNO    51
PROCNO   1

F2 - Acquisition Parameters
Date_    20140814
Time     13.50
INSTRUM spect
PROBHD   5 mm PABBO BB-
PULPROG zgpg30
TD       65536
SOLVENT CDCl3
DS       104
SWH      29761.904 Hz
FIDRES   0.454131 Hz
AQ       1.1010048 sec
RG       203
DW       16.800 usec
DE       6.50 usec
TE       302.1 K
D1       2.00000000 sec
D11      0.03000000 sec
TD0      1

===== CHANNEL f1 =====
NUC1     13C
P1       9.50 usec
PL1      -0.50 dB
PL1W     90.18825531 W
SFO1     125.7879676 MHz

===== CHANNEL f2 =====
CPDPRG2  wait16
NUC2     13C
P2       80.00 usec
PL2      15.00 dB
PL12     15.00 dB
PL13     20.00 dB
PL14     20.00 dB
PL15     15.306355443 W
PL12W    0.51864696 W
PL13W    0.20647706 W
SFO2     500.2020008 MHz

P2 - Processing parameters
SI       32768
SF       125.7754059 MHz
WDW      EM
SSB      0
LB       1.00 Hz
GB       0
PC       1.40
    
```

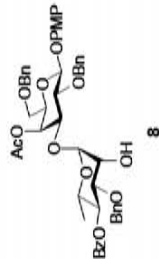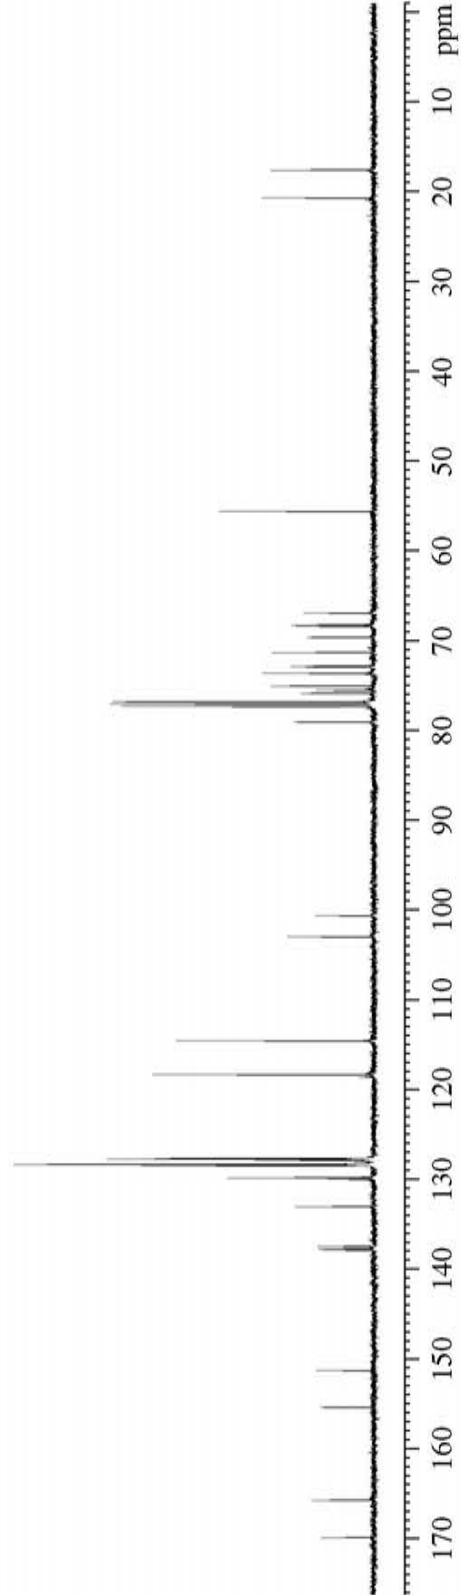

BM-VS-s15 in CDC13

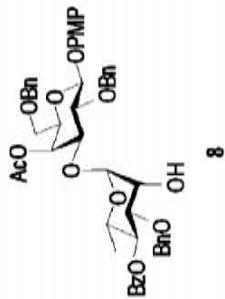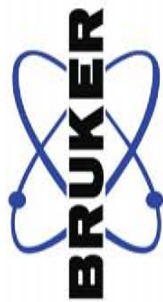

Current Data Parameters  
NAME BM-VS-s15  
EXPNO 52  
PROCNO 1

F2 - Acquisition Parameters  
Date\_ 20140814  
Time 13.57  
INSTRUM spect  
PROBHD 5 mm PABBO BB-  
PULPROG cosy90qf  
TD 2048  
SOLVENT CDC13  
NS 1  
DS 8  
SWH 5000.000 Hz  
FIDRES 2.441406 Hz  
AQ 0.2048000 sec  
RG 32  
DW 100.000 usec  
DE 6.50 usec  
TE 302.1 K  
DO 0.00000300 sec  
D1 1.48689198 sec  
D13 0.00000400 sec  
D16 0.00020000 sec  
IN0 0.00019590 sec

==== CHANNEL f1 =====  
NUC1 1H  
P0 14.25 usec  
P1 14.25 usec  
PL1 1.30 dB  
PL1W 15.30635643 W  
SFO1 500.2025010 MHz  
==== GRADIENT CHANNEL =====  
CPNAM[1] SINE.100  
GEZ1 10.00 &  
P16 1000.00 usec

F1 - Acquisition parameters  
ID 128  
SFO1 500.2025 MHz  
FIDRES 39.078320 Hz  
SW 10.000 ppm  
FMODE QF

F2 - Processing parameters  
SI 1024  
SF 500.2000126 MHz  
WDW SINE  
SSB 0  
LB 0 Hz  
GB 0  
EC 1.40

F1 - Processing parameters  
SI 1024  
MC2 QF  
SF 500.2000143 MHz  
WDW SINE  
SSB 0  
LB 0 Hz  
GB 0

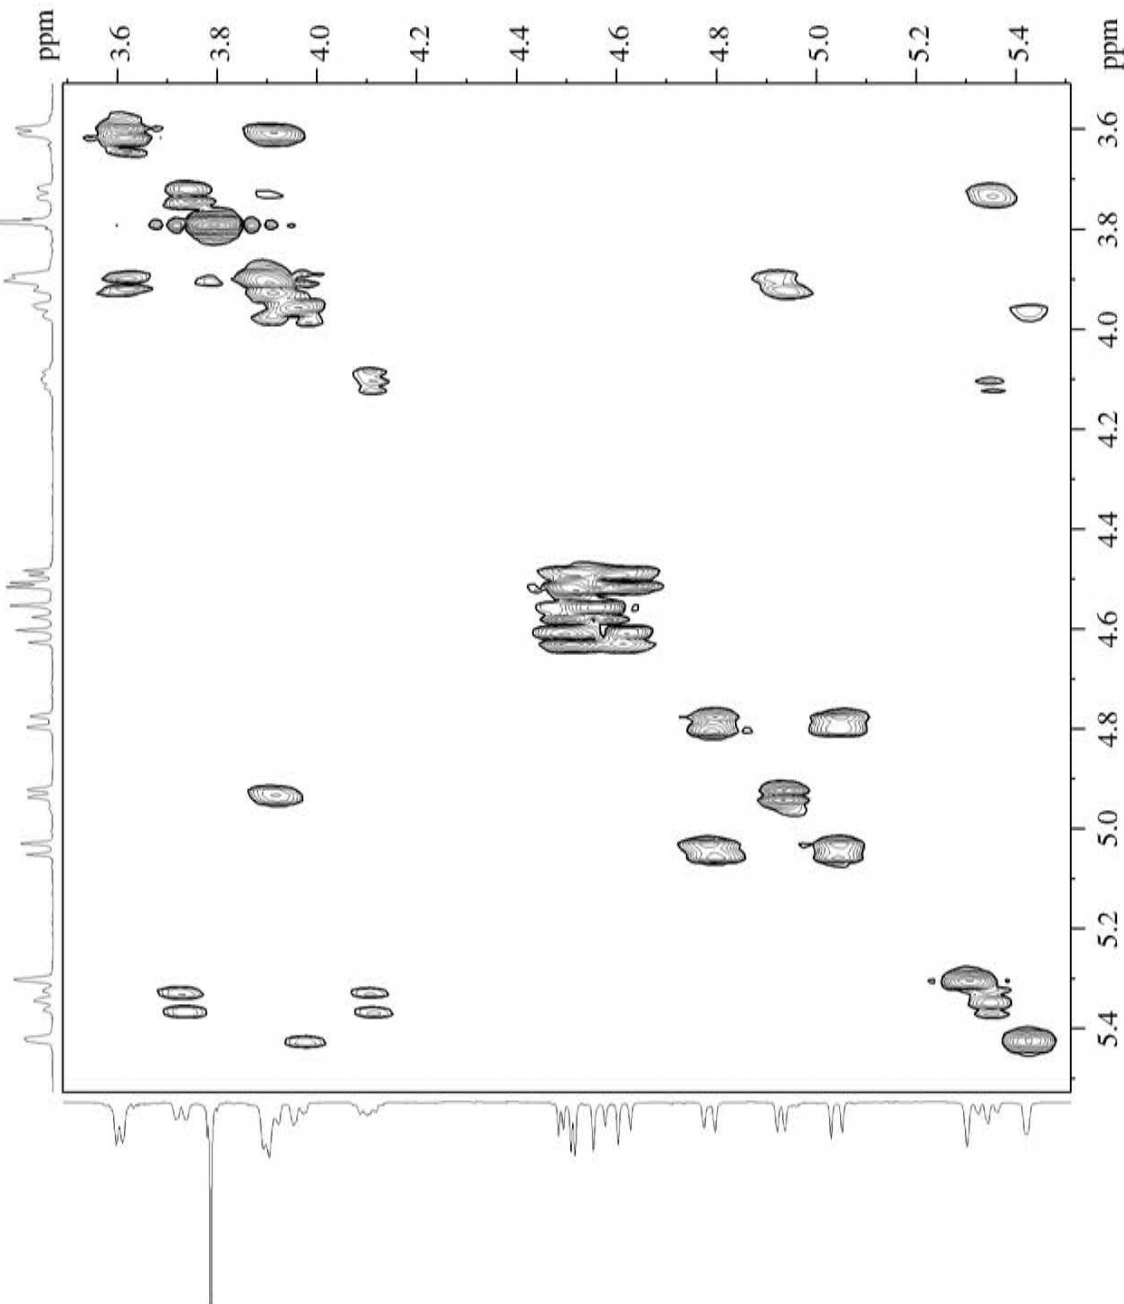

BM-VS-s15 in CDC13  
HSQCGP

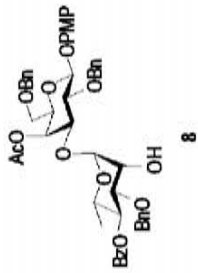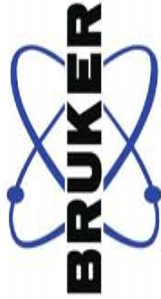

Current Data Parameters  
NAME BM-VS-s15  
EXPNO 53  
PROCNO 1

F2 - Acquisition Parameters

Date\_ 20140814  
Time 14:01  
INSTRUM spect  
PROBHD 5 mm PABBO BB  
TD 65536  
SOLVENT CDCl3  
NS 2  
DS 1  
SW 5000.000 Hz  
FIDRES 4.882933 Hz  
AQ 0.1024000 sec  
RG 32  
AQ 100.00 usec  
SFO1 501.9 K  
SFO2 145.0000000  
SFO3 0.0000000 sec  
SFO4 0.0000000 sec  
SFO5 1.0000000 sec  
SFO6 0.0300000 sec  
SFO7 0.0000000 sec  
SFO8 0.0000000 sec  
SFO9 0.0000000 sec  
SFO10 0.0000000 sec  
SFO11 0.0000000 sec  
SFO12 0.0000000 sec  
SFO13 0.0000000 sec  
SFO14 0.0000000 sec  
SFO15 0.0000000 sec  
SFO16 0.0000000 sec  
SFO17 0.0000000 sec  
SFO18 0.0000000 sec  
SFO19 0.0000000 sec  
SFO20 0.0000000 sec  
SFO21 0.0000000 sec  
SFO22 0.0000000 sec  
SFO23 0.0000000 sec  
SFO24 0.0000000 sec  
SFO25 0.0000000 sec  
SFO26 0.0000000 sec  
SFO27 0.0000000 sec  
SFO28 0.0000000 sec  
SFO29 0.0000000 sec  
SFO30 0.0000000 sec  
SFO31 0.0000000 sec  
SFO32 0.0000000 sec  
SFO33 0.0000000 sec  
SFO34 0.0000000 sec  
SFO35 0.0000000 sec  
SFO36 0.0000000 sec  
SFO37 0.0000000 sec  
SFO38 0.0000000 sec  
SFO39 0.0000000 sec  
SFO40 0.0000000 sec  
SFO41 0.0000000 sec  
SFO42 0.0000000 sec  
SFO43 0.0000000 sec  
SFO44 0.0000000 sec  
SFO45 0.0000000 sec  
SFO46 0.0000000 sec  
SFO47 0.0000000 sec  
SFO48 0.0000000 sec  
SFO49 0.0000000 sec  
SFO50 0.0000000 sec  
SFO51 0.0000000 sec  
SFO52 0.0000000 sec  
SFO53 0.0000000 sec  
SFO54 0.0000000 sec  
SFO55 0.0000000 sec  
SFO56 0.0000000 sec  
SFO57 0.0000000 sec  
SFO58 0.0000000 sec  
SFO59 0.0000000 sec  
SFO60 0.0000000 sec  
SFO61 0.0000000 sec  
SFO62 0.0000000 sec  
SFO63 0.0000000 sec  
SFO64 0.0000000 sec  
SFO65 0.0000000 sec  
SFO66 0.0000000 sec  
SFO67 0.0000000 sec  
SFO68 0.0000000 sec  
SFO69 0.0000000 sec  
SFO70 0.0000000 sec  
SFO71 0.0000000 sec  
SFO72 0.0000000 sec  
SFO73 0.0000000 sec  
SFO74 0.0000000 sec  
SFO75 0.0000000 sec  
SFO76 0.0000000 sec  
SFO77 0.0000000 sec  
SFO78 0.0000000 sec  
SFO79 0.0000000 sec  
SFO80 0.0000000 sec  
SFO81 0.0000000 sec  
SFO82 0.0000000 sec  
SFO83 0.0000000 sec  
SFO84 0.0000000 sec  
SFO85 0.0000000 sec  
SFO86 0.0000000 sec  
SFO87 0.0000000 sec  
SFO88 0.0000000 sec  
SFO89 0.0000000 sec  
SFO90 0.0000000 sec  
SFO91 0.0000000 sec  
SFO92 0.0000000 sec  
SFO93 0.0000000 sec  
SFO94 0.0000000 sec  
SFO95 0.0000000 sec  
SFO96 0.0000000 sec  
SFO97 0.0000000 sec  
SFO98 0.0000000 sec  
SFO99 0.0000000 sec  
SFO100 0.0000000 sec

===== CHANNEL F1 =====

NUC1 1H  
P1 14.25 usec  
F2 28.50 usec  
F3 0.10 usec  
SFO1 500.136300 MHz  
SFO2 500.2025010 MHz

===== CHANNEL F2 =====

NUC2 13C  
P2 9.50 usec  
F4 19.00 usec  
F5 70.00 usec  
F6 17.00 usec  
F7 17.00 usec  
SFO3 90.18825431 MHz  
SFO4 1.60779310 MHz  
SFO5 125.7675675 MHz

===== GRADIENT CHANNEL =====

GRANM[1] SINE.100  
GRANM[2] SINE.100  
GRANM[3] SINE.100  
GRANM[4] SINE.100  
GRANM[5] SINE.100  
GRANM[6] SINE.100  
GRANM[7] SINE.100  
GRANM[8] SINE.100  
GRANM[9] SINE.100  
GRANM[10] SINE.100  
GRANM[11] SINE.100  
GRANM[12] SINE.100  
GRANM[13] SINE.100  
GRANM[14] SINE.100  
GRANM[15] SINE.100  
GRANM[16] SINE.100  
GRANM[17] SINE.100  
GRANM[18] SINE.100  
GRANM[19] SINE.100  
GRANM[20] SINE.100  
GRANM[21] SINE.100  
GRANM[22] SINE.100  
GRANM[23] SINE.100  
GRANM[24] SINE.100  
GRANM[25] SINE.100  
GRANM[26] SINE.100  
GRANM[27] SINE.100  
GRANM[28] SINE.100  
GRANM[29] SINE.100  
GRANM[30] SINE.100  
GRANM[31] SINE.100  
GRANM[32] SINE.100  
GRANM[33] SINE.100  
GRANM[34] SINE.100  
GRANM[35] SINE.100  
GRANM[36] SINE.100  
GRANM[37] SINE.100  
GRANM[38] SINE.100  
GRANM[39] SINE.100  
GRANM[40] SINE.100  
GRANM[41] SINE.100  
GRANM[42] SINE.100  
GRANM[43] SINE.100  
GRANM[44] SINE.100  
GRANM[45] SINE.100  
GRANM[46] SINE.100  
GRANM[47] SINE.100  
GRANM[48] SINE.100  
GRANM[49] SINE.100  
GRANM[50] SINE.100  
GRANM[51] SINE.100  
GRANM[52] SINE.100  
GRANM[53] SINE.100  
GRANM[54] SINE.100  
GRANM[55] SINE.100  
GRANM[56] SINE.100  
GRANM[57] SINE.100  
GRANM[58] SINE.100  
GRANM[59] SINE.100  
GRANM[60] SINE.100  
GRANM[61] SINE.100  
GRANM[62] SINE.100  
GRANM[63] SINE.100  
GRANM[64] SINE.100  
GRANM[65] SINE.100  
GRANM[66] SINE.100  
GRANM[67] SINE.100  
GRANM[68] SINE.100  
GRANM[69] SINE.100  
GRANM[70] SINE.100  
GRANM[71] SINE.100  
GRANM[72] SINE.100  
GRANM[73] SINE.100  
GRANM[74] SINE.100  
GRANM[75] SINE.100  
GRANM[76] SINE.100  
GRANM[77] SINE.100  
GRANM[78] SINE.100  
GRANM[79] SINE.100  
GRANM[80] SINE.100  
GRANM[81] SINE.100  
GRANM[82] SINE.100  
GRANM[83] SINE.100  
GRANM[84] SINE.100  
GRANM[85] SINE.100  
GRANM[86] SINE.100  
GRANM[87] SINE.100  
GRANM[88] SINE.100  
GRANM[89] SINE.100  
GRANM[90] SINE.100  
GRANM[91] SINE.100  
GRANM[92] SINE.100  
GRANM[93] SINE.100  
GRANM[94] SINE.100  
GRANM[95] SINE.100  
GRANM[96] SINE.100  
GRANM[97] SINE.100  
GRANM[98] SINE.100  
GRANM[99] SINE.100  
GRANM[100] SINE.100

F1 - Acquisition Parameters

TD0 65536  
SFO1 125.7675675 MHz  
FIDRES 135.255975 Hz  
SW 200.000 ppm  
FREQ0 Echo-Antiecho  
F2 - Processing parameters  
SI 1024  
SF 500.2000000 MHz  
WDW EM  
SSB 0 Hz  
GB 0 Hz  
PC 1.40

F1 - Processing parameters

SI 1024  
SF 125.7675675 MHz  
WDW EM  
SSB 0 Hz  
GB 0 Hz  
PC 1.40

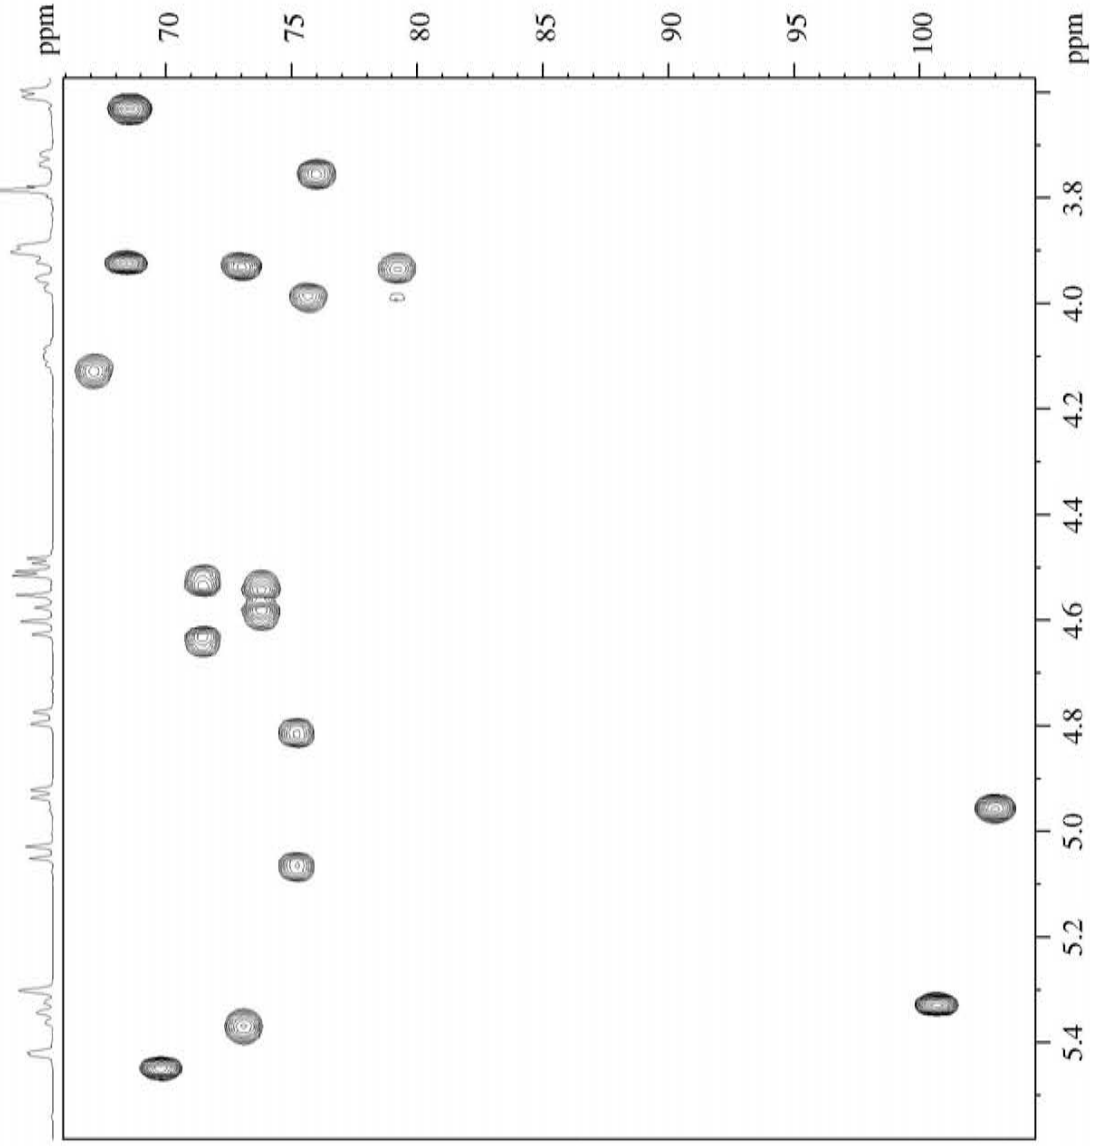

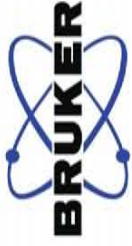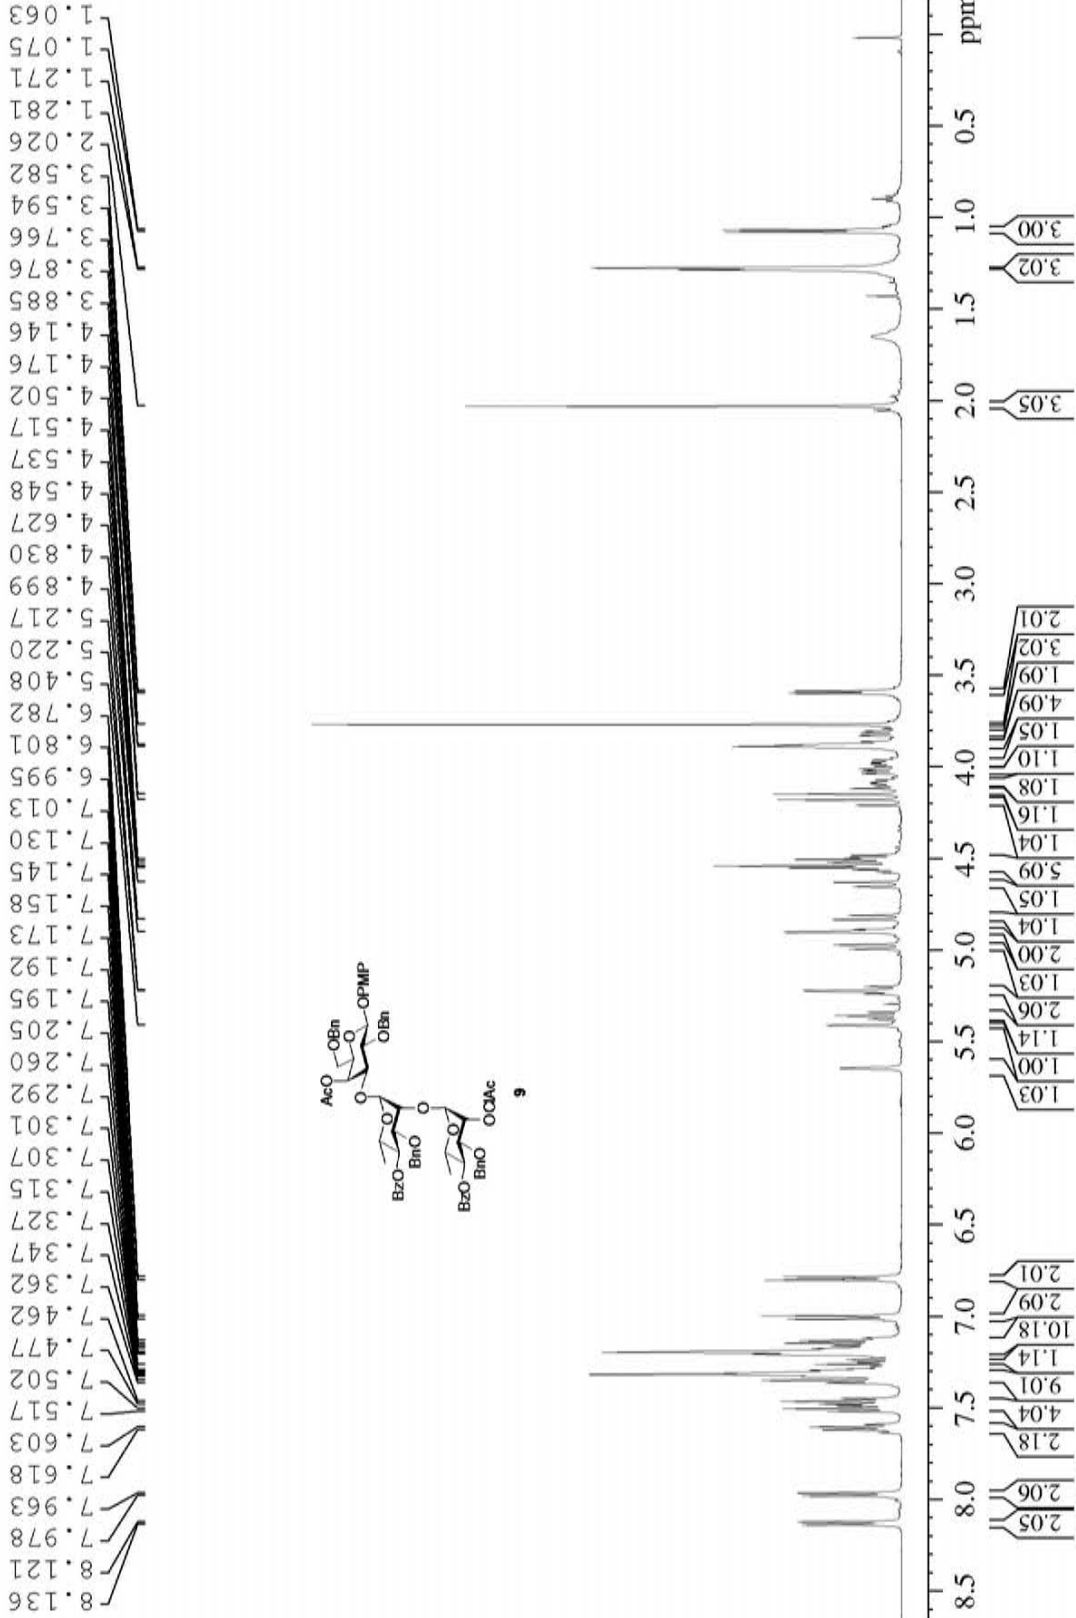

Current Data Parameters  
 Name: BM-VS-s16  
 ExpNO: 1  
 F2 - Acquisition Parameters  
 Date\_: 20180806  
 Time: 10:02  
 INSTRUM: spect  
 PROBHD: 5 mm PABBO BB-  
 PULPROG: zg30  
 TD: 65536  
 SOLVENT: CDCl3  
 NS: 2  
 DS: 4  
 SSB: 10350.578 Hz  
 FIDRES: 0.157630 Hz  
 AQ: 3.1719425 sec  
 ZG: 0.0000000 sec  
 ZM: 48.400 usec  
 DE: 6.150 usec  
 TE: 302.7 K  
 DL: 1.00000000 sec  
 TUG: 1

===== CHANNEL f1 =====  
 NUC1: 1H  
 P1: 14.25 usec  
 PL1: 0.00 dB  
 FWHM: 15.3045730 Hz  
 SFO1: 500.20130689 MHz

F2 - Processing parameters  
 SI: 32768  
 SF: 500.200156 MHz  
 SSB: 0  
 LB: 0.30 Hz  
 GB: 0  
 PC: 1.00

BM-VS-s16 in CDC13

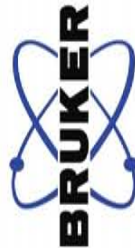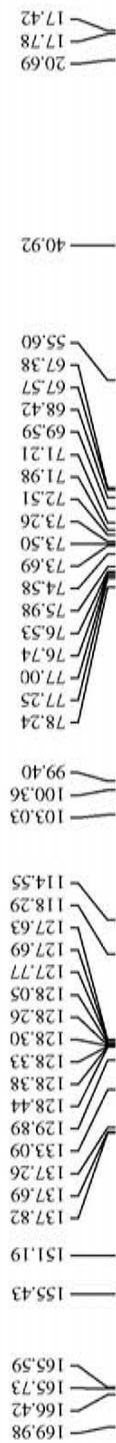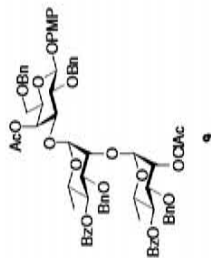

```

Current Data Parameters
NAME      BM-VS-s16
EXPNO    13
PROCNO   1

F2 - Acquisition Parameters
Date_    20140806
Time     11.05
INSTRUM  spect
PROBHD   5 mm PABBO BB-
PULPROG  zgpg30
ID       65536
SOLVENT  CDC13
NS       877
DS       4
SWH      23761.904 Hz
FIDRES   0.454131 Hz
AQ       1.1010048 sec
RG       203
DW       16.800 usec
DE       6.50 usec
TE       303.3 K
D1       2.00000000 sec
D11      0.05000000 sec
D10      1

***** CHANNEL f1 *****
NUC1     13C
P1       9.15 usec
PL1      -0.50 dB
PL12     96.18825531 W
PL13     125.7879576 MHz
SFO1     500.2620008 MHz

***** CHANNEL f2 *****
CPDPRG12 waltz16
NUC2     1H
P2       80.00 usec
PCPD2    1.30 dB
PL2      16.00 dB
PL12     15.30635643 W
PL13     0.51864696 W
PL12W    0.20647706 W
PL13W    500.2620008 MHz
SFO2

F2 - Processing parameters
SI       32768
SF       125.7753967 MHz
WDW      EM
SSB      0
LB       1.00 Hz
GB       0
PC       1.40
  
```

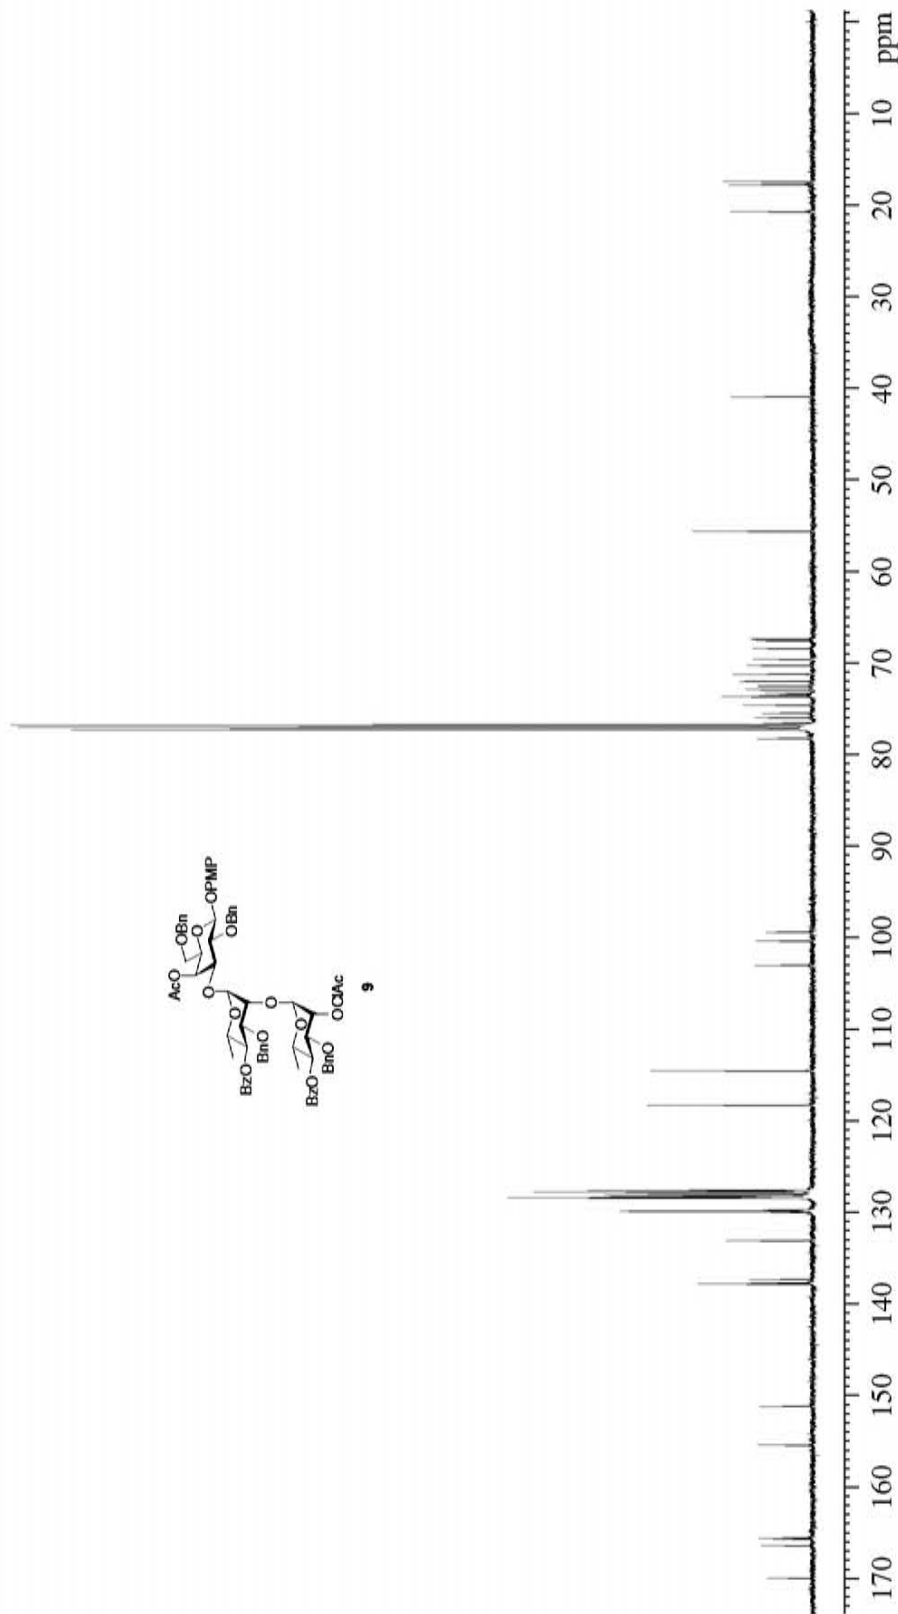

BM-VS-s16 in CDC13

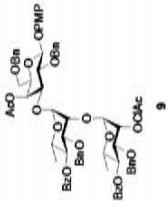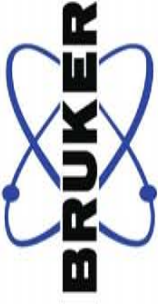

Current Data Parameters  
NAME BM-VS-s16  
EXPNO 11  
PROCNO 1

F2 - Acquisition Parameters  
Date\_ 20140806  
Time 10.43  
INSTRUM Spect  
PROBHD 5 mm PABBO BB  
PULPROG cosygqi  
ID 2048  
SOLVENT CDC13  
NS 1  
DS 8  
SWH 6684.492 Hz  
FIDRES 3.263912 Hz  
AQ 0.1531904 sec  
RG 50.8  
DM 74.800 usec  
DE 6.50 usec  
TE 302.6 K  
D0 0.00000300 sec  
D1 1.48683198 sec  
D13 0.00000400 sec  
D16 0.00020000 sec  
INO 0.00014975 sec

CHANNEL f1  
NUC1 1H  
P0 14.25 usec  
P1 14.25 usec  
PL1 1.30 dB  
PL1H 15.30635643 W  
SF01 500.2030073 MHz  
----- GRADIENT CHANNEL -----  
GPNAM[f1] SINE.100  
GPZ1 10.00 %  
P16 1000.00 usec

F1 - Acquisition parameters  
ID 128  
SF01 500.203 MHz  
FIDRES 52.170712 Hz  
SW 13.350 PPM  
FMODE QF

F2 - Processing parameters  
SI 1024  
SF 500.2000000 MHz  
WDW SINE  
SSB 0  
LB 0 Hz  
GB 0  
PC 1.00

F1 - Processing parameters  
SI 1024  
SF 500.2000000 MHz  
WDW SINE  
SSB 0  
LB 0 Hz  
GB 0

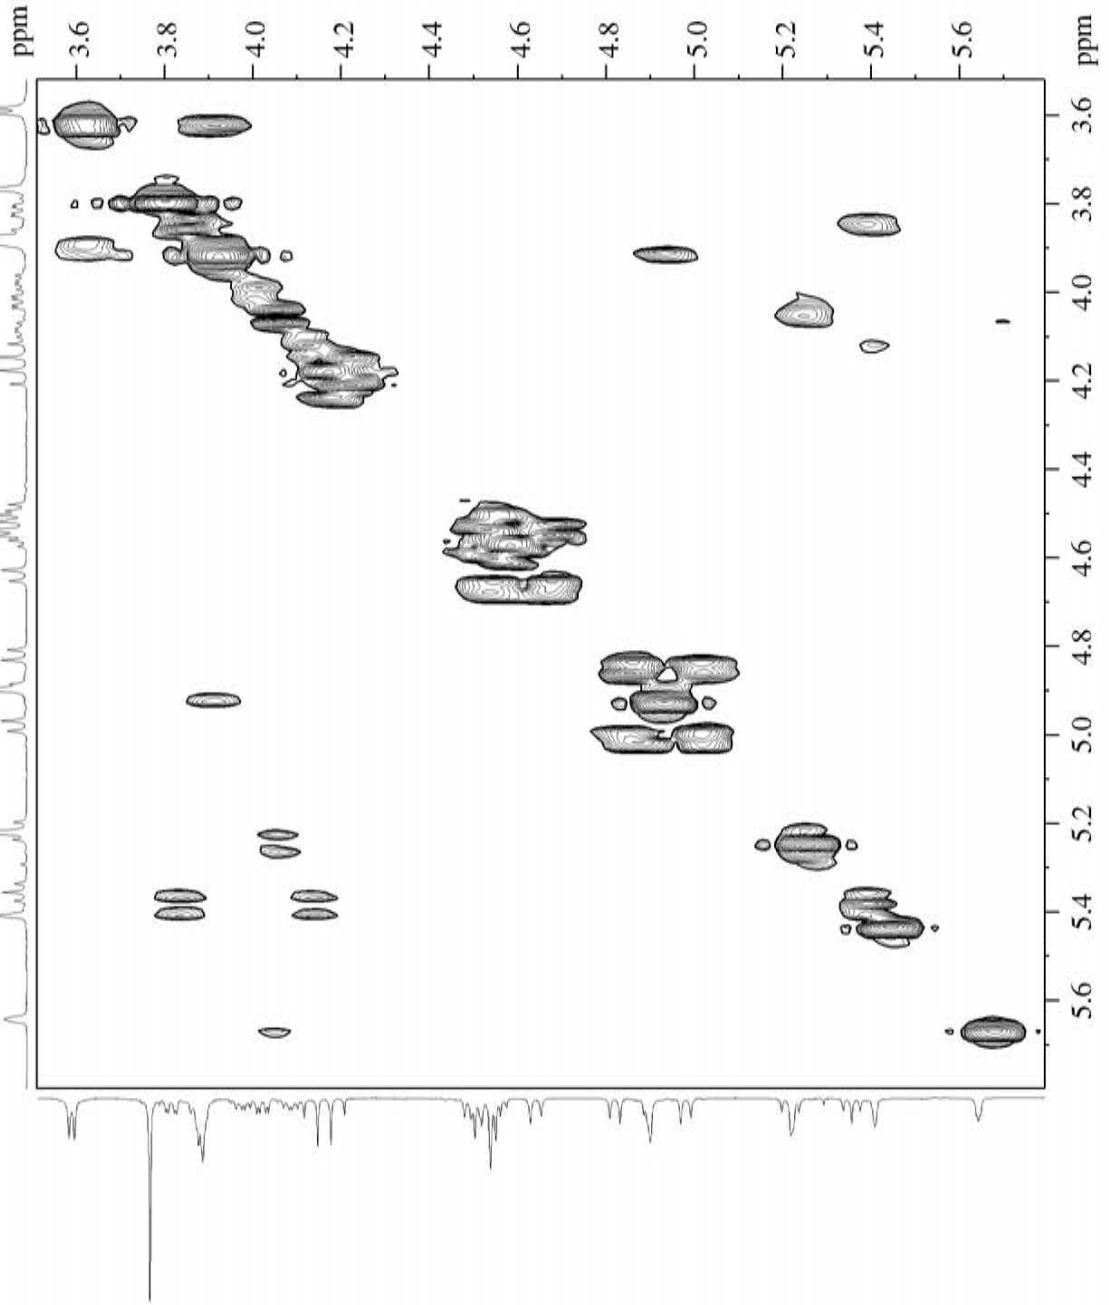



BM-VS-s16 in CDC13  
HSQC

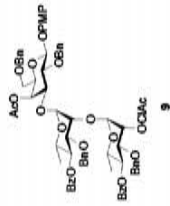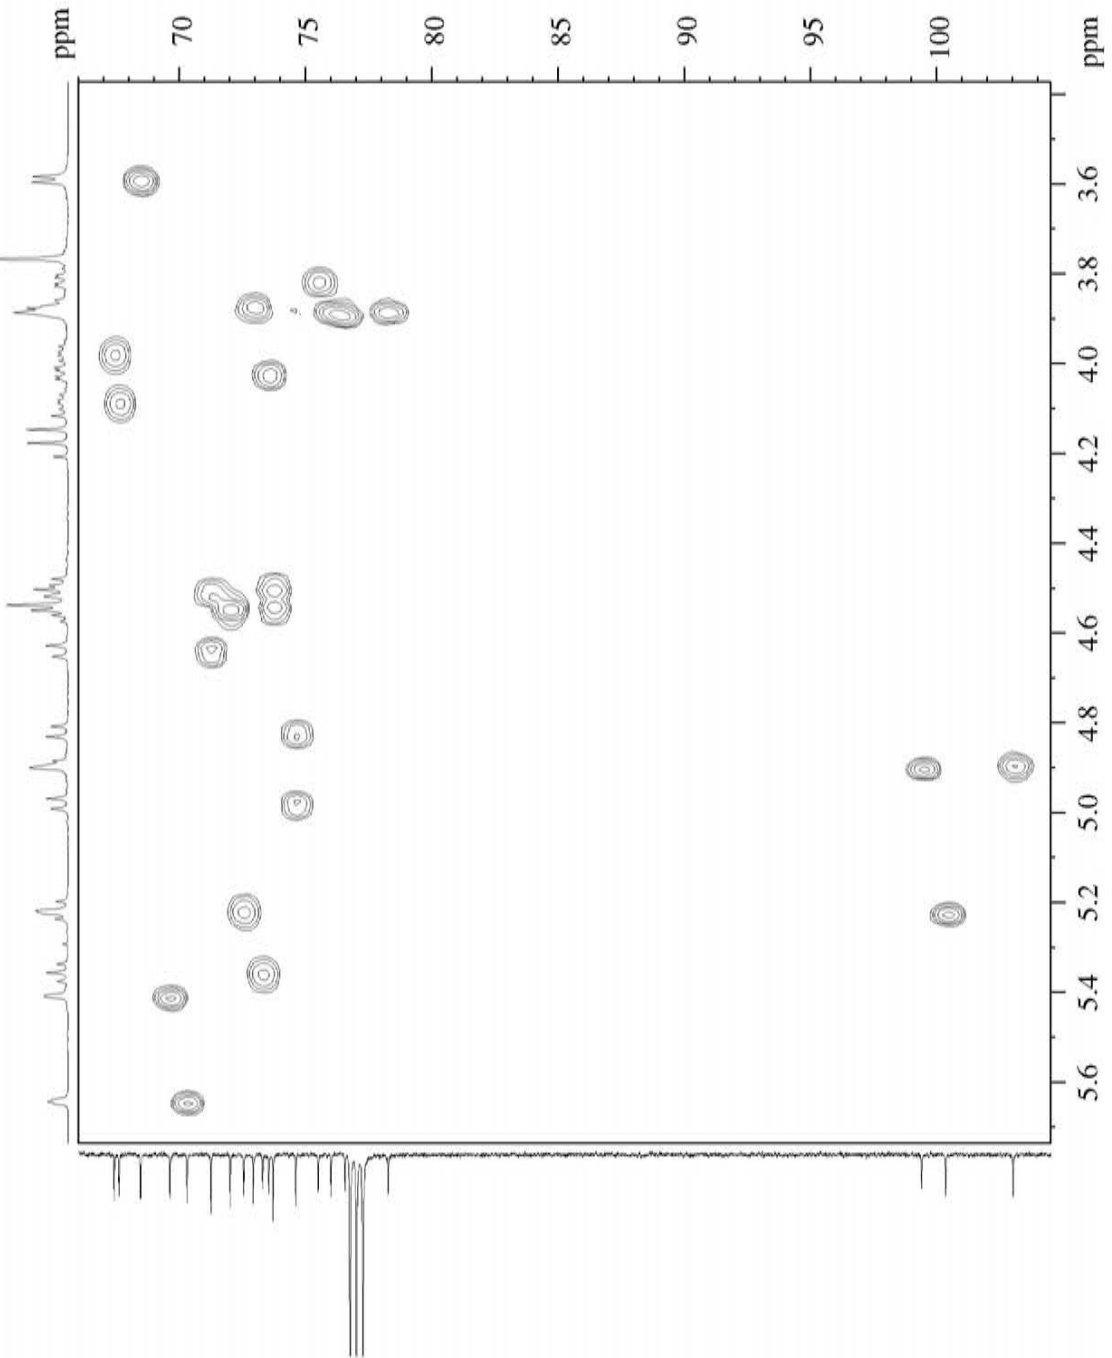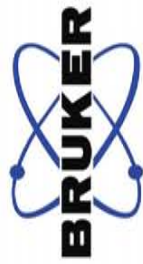

```

Current Data Parameters
EXPNO 12
PROCNO 1
F2 - Acquisition Parameters
=====
Date_ 2010.04.15
Time 10.45
INSTRUM spect
PROBHD 5 mm PABBO BB-
PULPROG zgpg30
SOLVENT CDCl3
NS 2
DS 16
SS 4000.136 Hz
AQ 0.1024000 sec
RG 512
AQ 0.1024000 sec
RG 512
TE 303.2 K
CNS12 145.0000000
DO 0.00000300 sec
D1 0.00000000 sec
D11 0.00000000 sec
D13 0.00000400 sec
D16 0.00000000 sec
DE 0.00000000 sec
TM 0.00001365 sec
ZSQC7B5
=====
CHANNEL F1
NUC1 13
P1 14.25 usec
P2 28.50 usec
P3 0.10 usec
P4 15.30 usec
P5 15.30 usec
P6 15.30 usec
SFO1 500.2525010 MHz
=====
CHANNEL F2
NUC2 1H
P7 9.50 usec
P8 19.00 usec
P9 19.00 usec
P10 70.00 usec
P11 17.00 usec
P12 17.00 usec
P13 17.00 usec
P14 17.00 usec
P15 17.00 usec
P16 17.00 usec
P17 17.00 usec
P18 17.00 usec
P19 17.00 usec
SFO2 125.767875 MHz
=====
GRADIENT CHANNEL
=====
GPRAM[1] SINE,100
GPRAM[2] SINE,100
GPRAM[3] SINE,100
GPRAM[4] SINE,100
GPRAM[5] SINE,100
GPRAM[6] SINE,100
GPRAM[7] SINE,100
GPRAM[8] SINE,100
GPRAM[9] SINE,100
GPRAM[10] SINE,100
GPRAM[11] SINE,100
GPRAM[12] SINE,100
GPRAM[13] SINE,100
GPRAM[14] SINE,100
GPRAM[15] SINE,100
GPRAM[16] SINE,100
GPRAM[17] SINE,100
GPRAM[18] SINE,100
GPRAM[19] SINE,100
GPRAM[20] SINE,100
=====
E1 - Acquisition parameters
SFO1 125.768 MHz
SFO2 125.767875 MHz
FIDRES 98.371853 Hz
SFO 200.000000 MHz
FNAME Echo-Antiecho
F2 - Processing parameters
SI 1024
SF 500.0000138 MHz
AQ 0.1024000 sec
RG 512
DE 0.00000000 sec
TE 303.2 K
GB 0
PC 1.00
=====
E1 - Processing parameters
SI 1024
SFO1 125.768 MHz
SFO2 125.767875 MHz
FIDRES 98.371853 Hz
SFO 200.000000 MHz
FNAME Echo-Antiecho
F2 - Processing parameters
SI 1024
SF 500.0000138 MHz
AQ 0.1024000 sec
RG 512
DE 0.00000000 sec
TE 303.2 K
GB 0
PC 1.00
=====
E1 - Processing parameters
SI 1024
SFO1 125.768 MHz
SFO2 125.767875 MHz
FIDRES 98.371853 Hz
SFO 200.000000 MHz
FNAME Echo-Antiecho
F2 - Processing parameters
SI 1024
SF 500.0000138 MHz
AQ 0.1024000 sec
RG 512
DE 0.00000000 sec
TE 303.2 K
GB 0
PC 1.00
=====

```

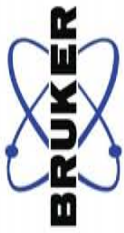

BM-VS-s17 CDCl3

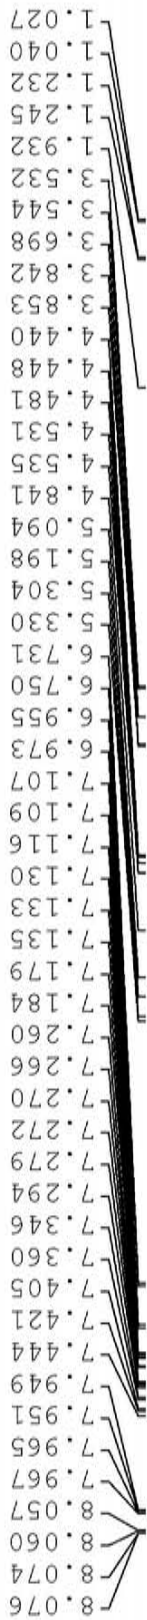

Chiront Data Parameters  
 NAME BM-VS-s17  
 EXPNO 30  
 PROCNO 1  
 F2 - Acquisition Parameters  
 Date\_ 20140821  
 Time 14:32  
 PROGM spect  
 PULPROG zgpg30  
 FIDRES 0.157632 Hz  
 AQ 3.1719425 sec  
 PC 20.5 usec  
 DR 48.44 usec  
 DE 6.90 usec  
 TE 302.6 K  
 D1 1.00000000 sec  
 TD0 1  
 ===== CHANNEL f1 =====  
 NUC1 1H  
 P1 14.25 usec  
 PL 0.00 dB  
 F1 500.136363 MHz  
 SFO1 500.136363 MHz  
 F2 - Processing parameters  
 SI 32768  
 SF 500.136363 MHz  
 SE 4  
 SSB 0  
 LB 0.30 Hz  
 GB 0  
 PC 1.00

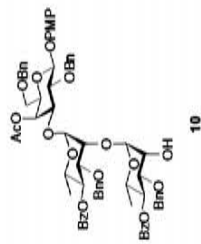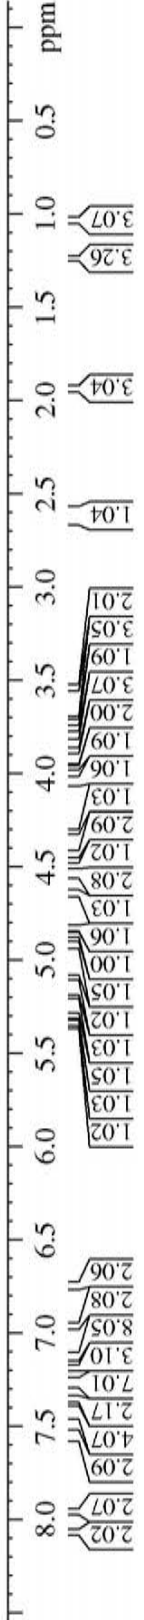

BM-VS-s17 CDC13

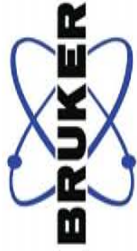

169.91  
165.74  
165.67  
155.34  
151.14  
137.72  
137.69  
137.66  
137.33  
133.04  
132.97  
129.98  
129.88  
129.80  
129.75  
128.41  
128.35  
128.30  
128.26  
128.23  
128.21  
128.07  
127.78  
127.69  
127.59  
127.52  
118.21  
114.48  
102.98  
101.03  
100.56  
77.80  
77.26  
77.00  
76.75  
75.89  
75.58  
75.17  
74.37  
73.60  
73.24  
72.81  
71.62  
71.34  
69.59  
68.41  
67.98  
67.53  
66.95  
55.51

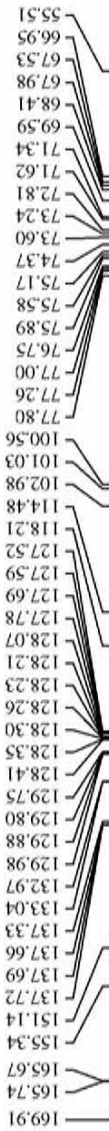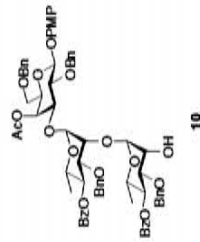

Current Data Parameters  
 NAME BM-VS-s17  
 EXPNO 31  
 PROCNO 1

F2 - Acquisition Parameters  
 Date\_ 20140821  
 Time 14.33  
 INSTRUM spect  
 PROBHD 5 mm PABBO BB-  
 PULPROG zgpg30  
 TD 65536  
 SOLVENT CDC13  
 NS 157  
 DS 4  
 SWH 29761.904 Hz  
 FIDRES 0.454131 Hz  
 AQ 1.1010048 sec  
 RG 203  
 DW 16.800 usec  
 DE 6.50 usec  
 TE 303.2 K  
 D1 2.00000000 sec  
 D11 0.03000000 sec  
 TDO 1

===== CHANNEL f1 =====  
 NUC1 13C  
 P1 9.50 usec  
 PL1 -0.50 dB  
 PL1W 90.1882531 W  
 SF01 125.7879676 MHz

===== CHANNEL f2 =====  
 CPDPRG[2] maltz16  
 NUC2 1H  
 PCPD2 80.00 usec  
 PL2 1.30 dB  
 PL12 16.00 dB  
 PL13 20.00 dB  
 PL2W 15.30635643 W  
 PL12W 0.51864696 W  
 PL13W 0.20647706 W  
 SF02 500.2020008 MHz

F2 - Processing parameters  
 SI 32768  
 SF 125.7754095 MHz  
 WDW EM  
 SSB 0  
 LB 1.00 Hz  
 GB 0  
 PC 1.40

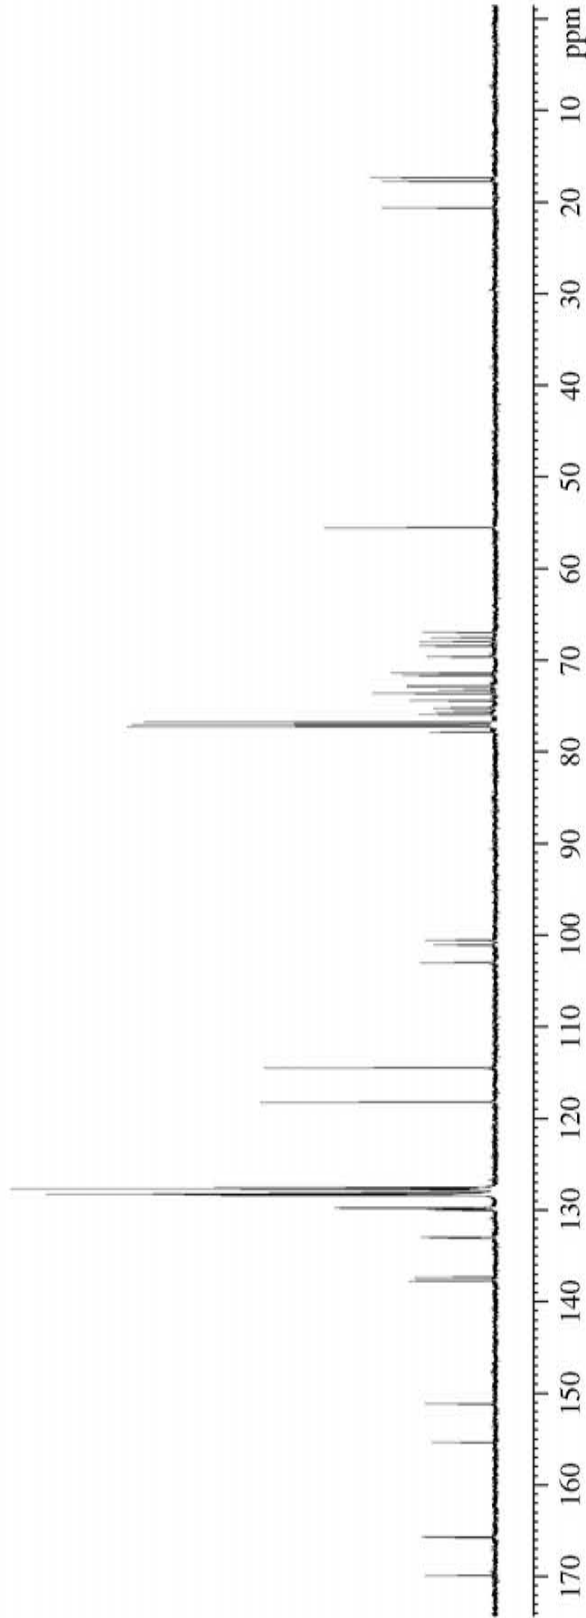

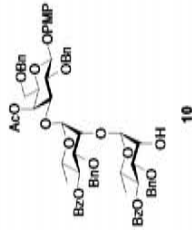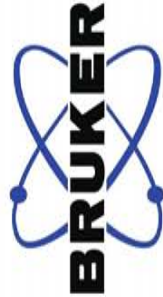

```

Current Data Parameters
NAME      BM-VS-s17
EXPNO    32
PROCNO   1

F2 - Acquisition Parameters
Date_    20140921
Time     14.42
INSTRUM  spect
PROBHD   5 mm PABBO BB-
PULPROG  cosygpgfi
ID       2048
SOLVENT  CDCl3
NS       1
DS       8
SWH      5000.000 Hz
FIDRES   2.441406 Hz
AQ       0.2048000 sec
RG       28.5
DW       100.000 usec
DE       6.50 usec
TE       303.5 K
D0       0.00000300 sec
D1       1.4889198 sec
D13      0.00000400 sec
D16      0.00020000 sec
INO      0.00019990 sec

===== CHANNEL f1 =====
NUC1     1H
P0       14.25 usec
P1       14.25 usec
PL1      1.30 dB
PL1W     15.30635643 W
SF01     500.2025010 MHz

===== GRADIENT CHANNEL =====
GENAM[1] SINE.100
GP21     10.00 %
P16      1000.00 usec

F1 - Acquisition Parameters
ID       128
SF01     500.2025 MHz
FIDRES   39.078320 Hz
SW       10.000 PPM
PRMODE   QF

F2 - Processing parameters
SI       1024
SF       500.2000505 MHz
WDW      SINE
SSB      0
LB       0 Hz
GB       0
PC       1.00

F1 - Processing parameters
SI       1024
MC2      QF
SF       500.2000540 MHz
WDW      SINE
SSB      0
LB       0 Hz
GB       0
  
```

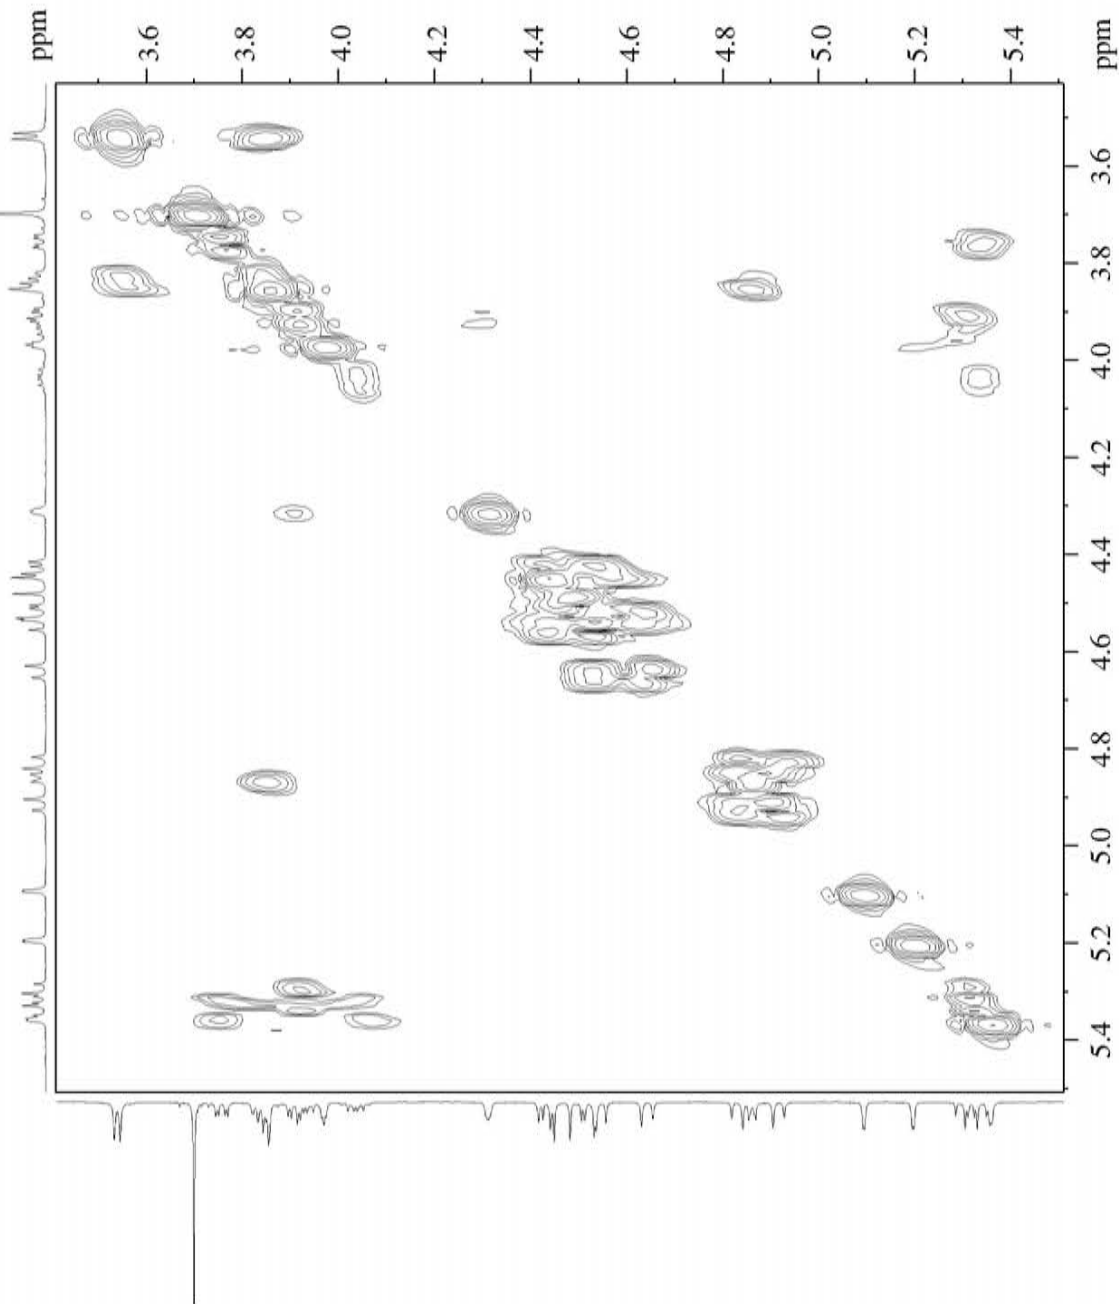

BM-VS-s17 CDCl3  
HSQC

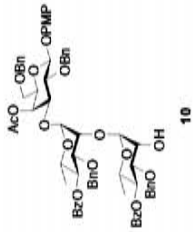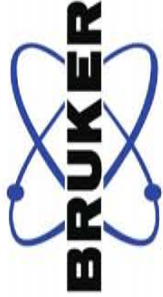

Current Data Parameters  
NAME: BM-VS-s17  
EXPNO: 33  
PROCNO: 1

F2 - Acquisition Parameters  
Date\_: 20140821  
Time: 14:48

AcqMeth: zgpg30  
PROCNO: 33  
PULPROG: zgpg30  
TD: 1024

SOLVENT: CDCl3  
DS: 4  
DE: 14

SWH: 5000.000 Hz  
FIDRES: 4.382813 Hz  
AQ: 0.1024000 sec

RG: 655  
DM: 100.000 umsc  
DE: 6.50 umsc  
TE: 303.0 K

CHGT2: 145.0000000 Hz  
D1: 0.0000000 sec  
D2: 1.5000000 sec

D4: 0.00172414 sec  
D11: 0.03000000 sec  
D13: 0.00000000 sec

D24: 0.00000000 sec  
D24: 0.0008207 sec  
IRB0: 0.00001955 sec

===== CHANNEL f1 =====  
NUC1: 1H  
P1: 14.25 umsc  
PC: 88.50 umsc

P2: 1.0 umsc  
P3: 1.0 umsc  
P4: 1.0 umsc  
P5: 1.0 umsc

PL1M: 15.30435643 M  
RF01: 560.2025010 MHz  
===== CHANNEL f2 =====

CPDPRG2: zgpg30  
NUC2: 13C  
P7: 9.50 umsc  
P8: 19.00 umsc

P9: 9.50 umsc  
P10: 19.00 umsc  
P11: -0.50 umsc  
P12: -0.50 umsc

P13: 17.00 umsc  
P14: 17.00 umsc  
P15: 90.18825531 M  
P16: 1.60379910 M

P17: 125.7679615 MHz  
===== GRADIENT CHANNEL =====  
GPRM[1]: SINE-100  
GPRM[2]: SINE-100  
GPRM[3]: SINE-100

GPRM[4]: SINE-100  
GPRM[5]: SINE-100  
GPRM[6]: SINE-100  
GPRM[7]: SINE-100

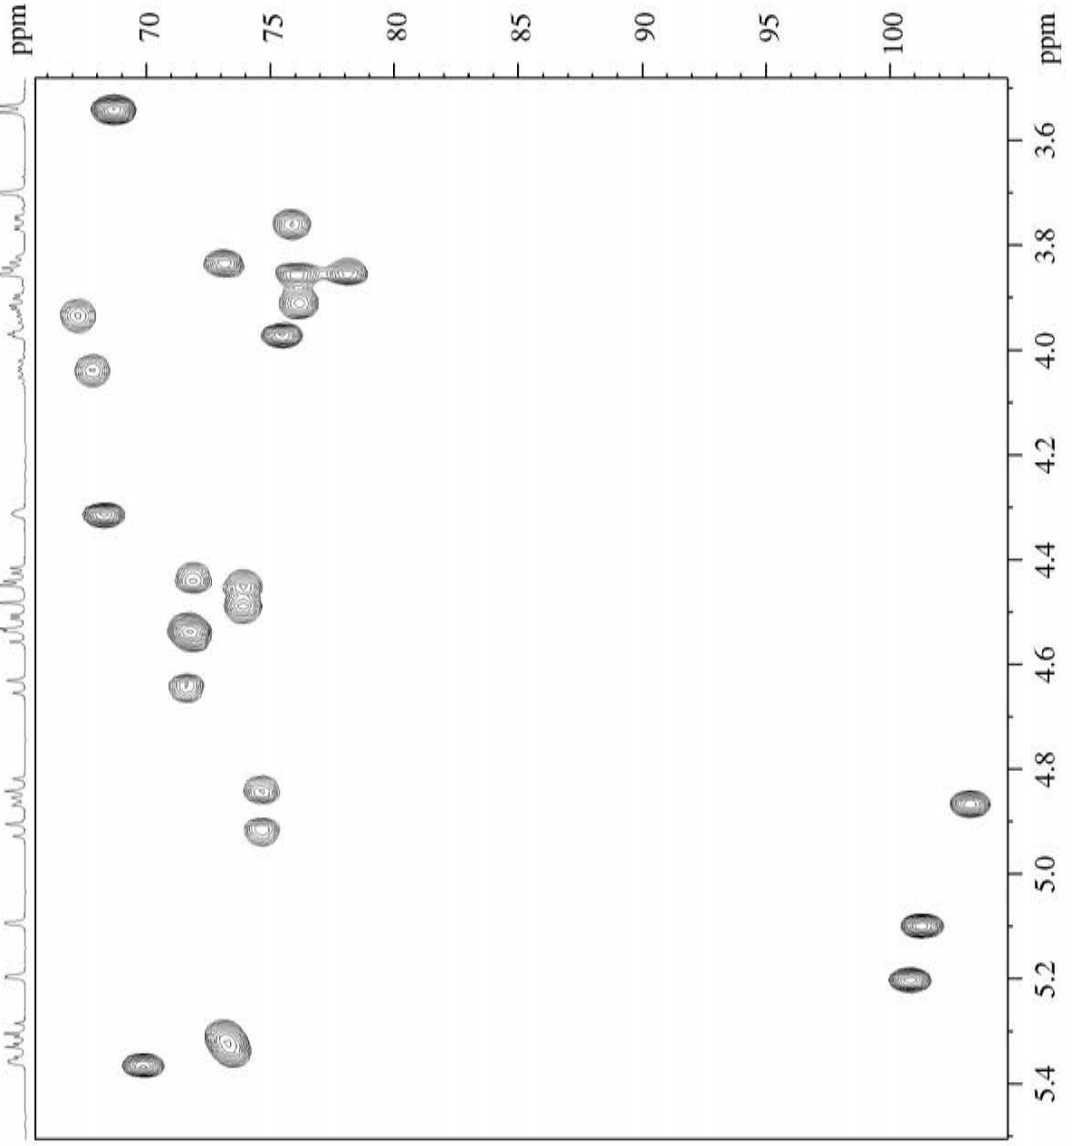

F2 - Processing parameters  
SI: 1024  
SF: 500.1360502 MHz  
WDW: EM  
SSB: 0 Hz  
GB: 0  
PC: 1.00

F1 - Processing parameters  
SI: 1024  
SF: 125.7679615 MHz  
WDW: EM  
SSB: 0 Hz  
GB: 0  
PC: 1.00

BM-VS-s18 in CDCl3

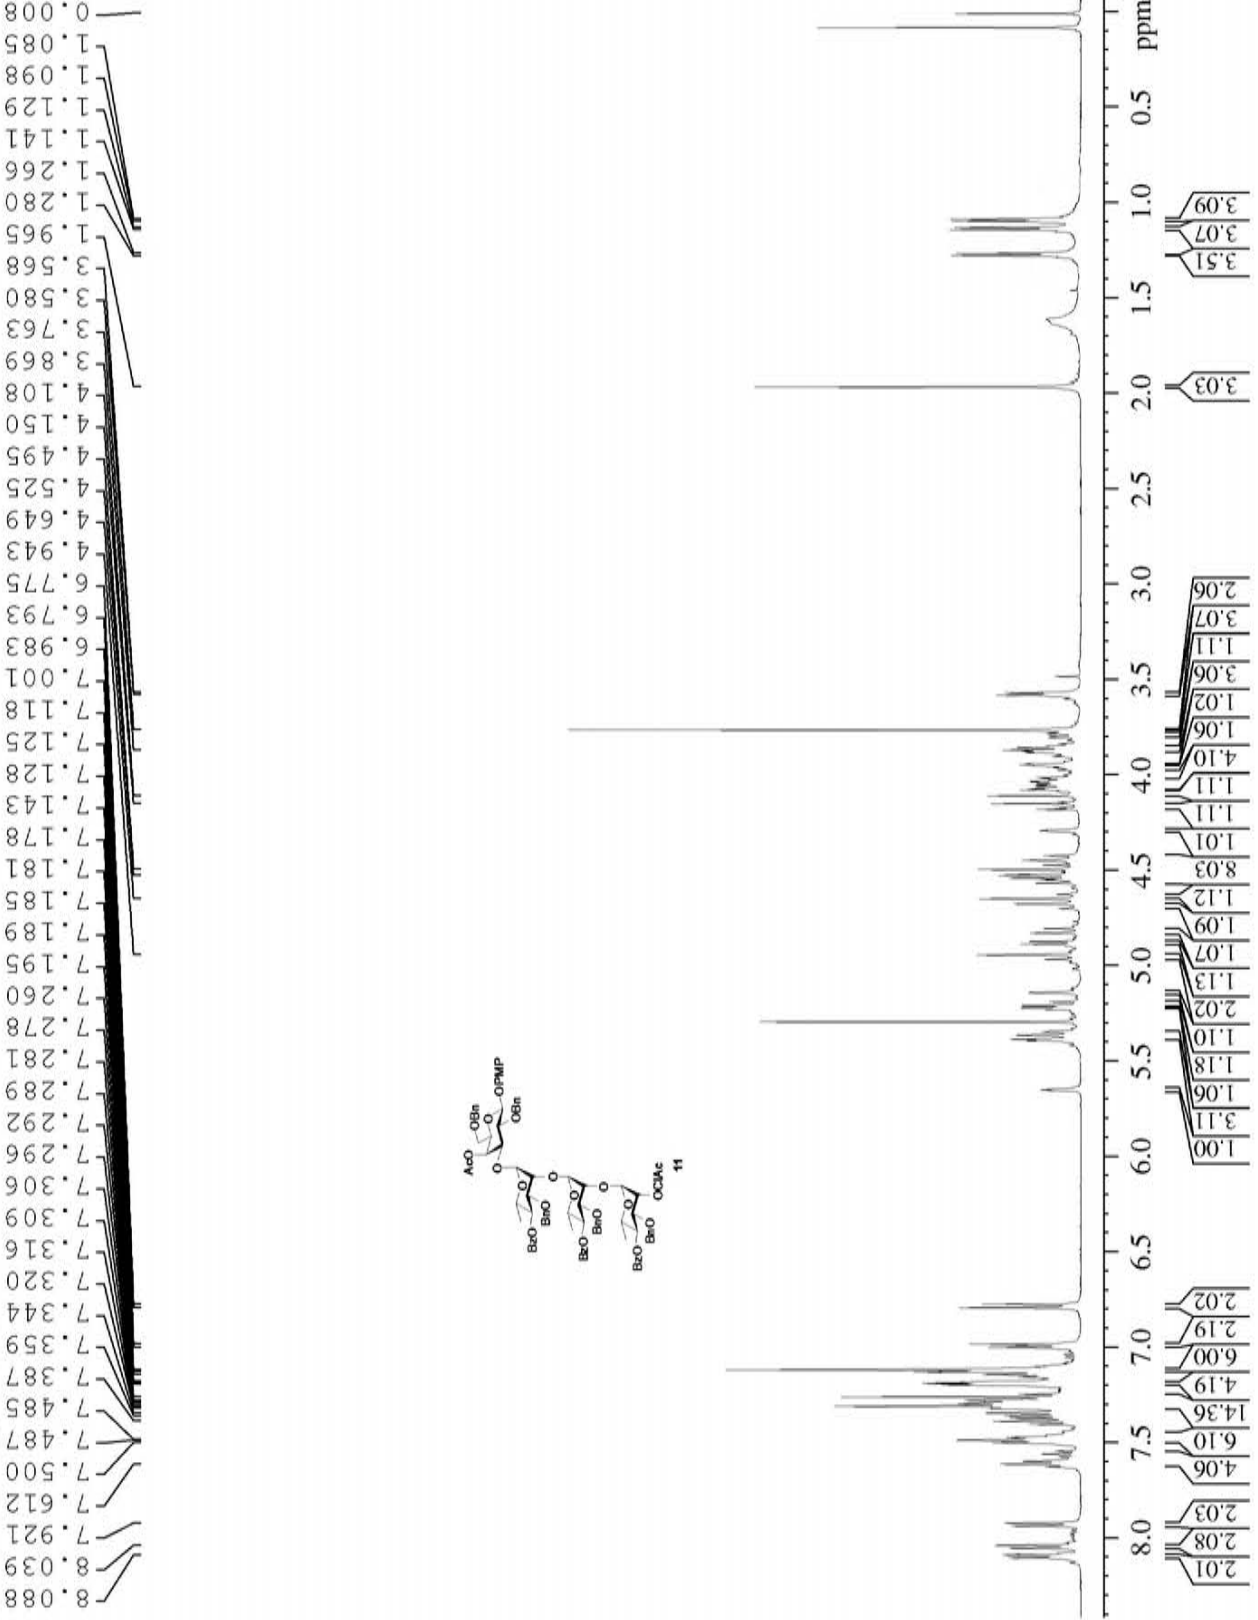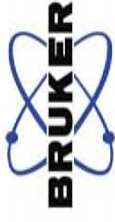

Current Data Parameters  
 NMR BM-VS-s18  
 PROCNO 50  
 F2 - Acquisition Parameters  
 Date 20140805  
 Time 11.15  
 INSTRUM spect  
 PROBHD 5 mm PABBO BB-  
 PULPROG zg30  
 ID 65536  
 SOLVENT CDCl3  
 NS 16  
 DS 4  
 SWH 10330.576 Hz  
 FIDRES 0.157632 Hz  
 AQ 3.1719425 sec  
 RG 101  
 DW 48.400 usec  
 DE 6.50 usec  
 TE 302.0 K  
 D1 1.00000000 sec  
 TD0 1

CHEMNAME: CHLOROFORM D  
 CHANNEL f1 1H  
 NUCL1 1H  
 P1 14.21 usec  
 PL1 1.30 dB  
 PL1N 15.306356443 N  
 SFO1 500.2030889 MHz

F2 - Processing Parameters  
 SI 32768  
 SF 500.2000165 MHz  
 WDW EM  
 SSB 0  
 LB 0.30 Hz  
 GB 0  
 PC 1.00

BM-VS-s18 in CDCl3

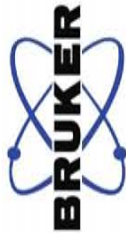

169.98  
166.35  
165.75  
165.73  
165.59  
158.97  
155.48  
151.25  
137.83  
137.71  
137.44  
133.25  
133.12  
133.05  
130.03  
130.00  
129.90  
129.87  
129.83  
129.79  
128.44  
128.39  
128.36  
128.30  
128.28  
128.26  
128.23  
128.12  
127.77  
127.69  
127.66  
127.54  
127.51  
118.31  
114.56  
103.09  
101.10  
100.65  
99.21  
88.17  
77.26  
77.00  
76.75  
76.08  
75.96  
75.70  
75.41  
74.59  
73.90  
73.71  
73.30  
73.11  
72.94  
72.66  
71.82  
71.33  
70.16  
69.62  
68.48  
67.72  
67.60  
67.33  
55.62  
53.38  
40.92  
20.64  
17.76  
17.48

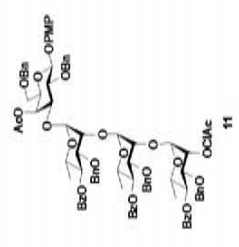

Current Data Parameters  
 NAME BM-VS-s18  
 EXPNO 33  
 PROCNO 1  
 F2 - Acquisition Parameters  
 Date\_ 20140805  
 Time 11:48  
 INSTRUM spect  
 PROBRD 5 mm PARBO BB-  
 PULPROG zgpg30  
 TD 65536  
 SOLVENT CDCl3  
 NS 295  
 DS 4  
 SFO1 29761.904 Hz  
 FIDRES 0.454133 Hz  
 AQ 1.1010046 sec  
 RG 203  
 DM 16.800 usec  
 DE 6.50 usec  
 TE 303.3 K  
 D1 2.0000000 sec  
 D11 0.0300000 sec  
 TDO 1  
 CHANNEL f1  
 NUCL1 13C  
 P1 9.50 usec  
 PL1 -0.50 dB  
 PL1W 90.18625531 W  
 SF01 125.7679676 MHz  
 CHANNEL f2  
 CPDPRG2 waltz16  
 NUCL2 1H  
 P2 80.00 usec  
 PL2 0.00 dB  
 PL2W 1.00 dB  
 PL3 20.00 dB  
 PL3W 15.306358643 W  
 PL12W 0.51864696 W  
 PL13W 0.20647706 W  
 SF02 500.2020008 MHz  
 F2 - Processing parameters  
 SI 32768  
 SF 125.7753941 MHz  
 WHW 0  
 SSB 0  
 GB 0  
 PC 1.40

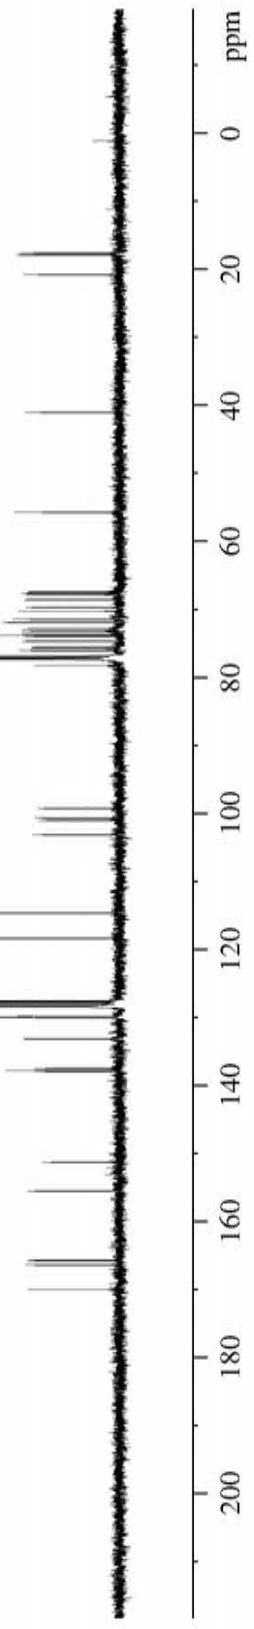

BM-VS-s18 in CDC13

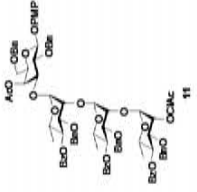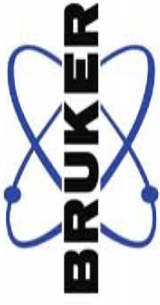

Current Data Parameters  
 NAME BM-VS-s18  
 EXPNO 31  
 PROCNO 1

F2 - Acquisition Parameters  
 Date\_ 20140805  
 Time 11.18  
 INSTRUM spect  
 PROBD 5 mm FAPBO BB-  
 PULPROG cosygpfH  
 TD 2048  
 SOLVENT CDC13  
 NS 1  
 DS 8  
 SWH 5000.000 Hz  
 FIDRES 2.441406 Hz  
 AQ 0.2048000 sec  
 RG 101  
 RC 1  
 DW 100.000 usec  
 DE 6.50 usec  
 TE 302.0 K  
 D0 0.00000300 sec  
 D1 1.48689198 sec  
 D13 0.00000400 sec  
 D16 0.00020000 sec  
 INO 0.00019990 sec

===== CHANNEL f1 =====  
 NUC1 1H  
 P0 14.25 usec  
 P1 14.25 usec  
 PL1 1.30 dB  
 PL1W 15.30635643 W  
 SF01 500.2025010 MHz

===== GRADIENT CHANNEL =====  
 GENAM[1] SINE.100  
 GP21 10.00 %  
 P16 1000.00 usec

F1 - Acquisition parameters  
 ID 128  
 SF01 500.2025 MHz  
 FIDRES 39.078320 Hz  
 SW 10.000 ppm  
 FMODE QF

F2 - Processing parameters  
 SI 1024  
 SF 500.2000143 MHz  
 WDM 0  
 SSB 0 Hz  
 LB 0 Hz  
 GB 0  
 PC 1.00

F1 - Processing parameters  
 SI 1024  
 MCT QF  
 SF 500.2000135 MHz  
 WDM 0  
 SSB 0 Hz  
 LB 0 Hz  
 CB 0

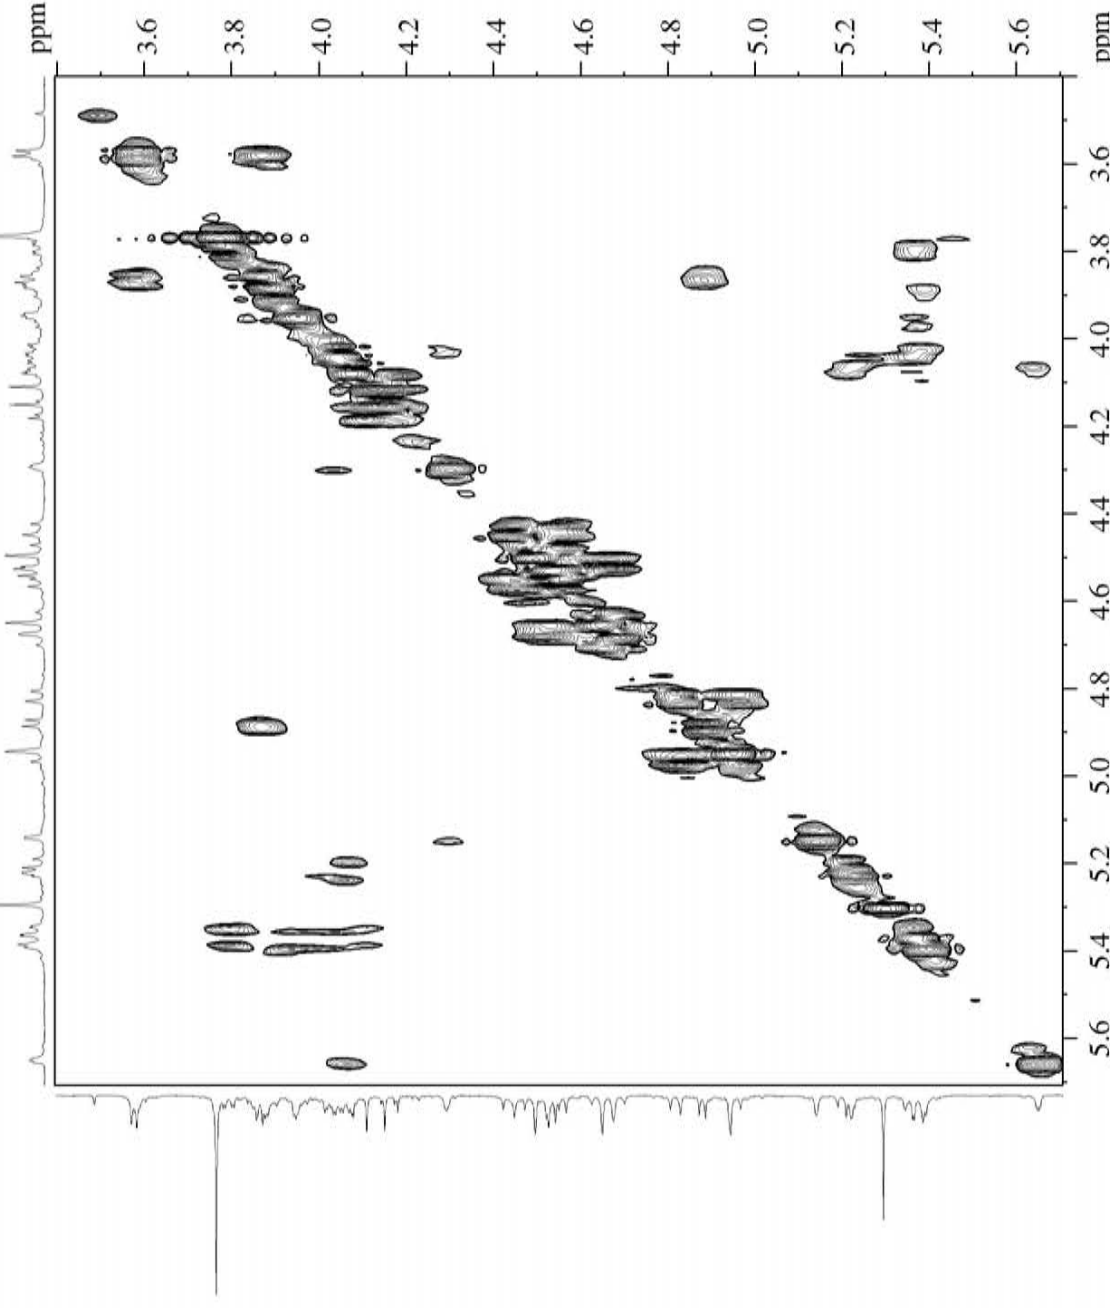



BM-VS-s18 in CDC13  
HSQCGP

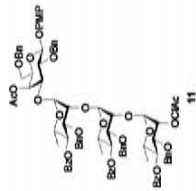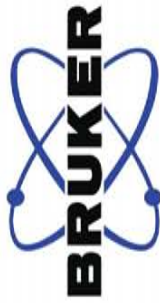

Current Data Parameters:  
NAME BM-VS-s18  
EXPNO 32  
PROCNO 1

F1 - Acquisition Parameters  
Date\_ 20140903  
Time 11:25  
INSTRUM spect  
PROBHD 5 mm PABBO ED  
PULPROG zgpg30  
TD 1024  
SOLVENT CDC13  
NS 2  
DS 8  
SWH 5000.000 Hz  
FIDRES 4.882013 Hz  
AQ 0.1024000 sec  
RG 320  
AQ 0.1024000 sec  
RG 320  
TE 302.1 K  
CNS12 145.0000000  
DO 0.0000000 sec  
D1 0.0000000 sec  
D2 0.0000000 sec  
D3 0.0017244 sec  
D4 0.003000000 sec  
D11 0.030000000 sec  
D13 0.000004000 sec  
D16 0.000200000 sec  
D18 0.000000000 sec  
L8 0.000000000 sec  
L9 0.000000000 sec  
SFOFTS 0.0000185 sec

===== CHANNEL f1 =====  
NUC1 14.25 usec  
P1 14.25 usec  
P2 28.50 usec  
P2R 0.10 usec  
P11 15.30 usec  
P11R 15.30 usec  
SFO1 500.20245010 MHz

===== CHANNEL f2 =====  
CPDPRG2 gpc  
NUC2 9.55 usec  
P3 9.55 usec  
P4 19.00 usec  
PCPD2 70.00 usec  
P1 17.00 usec  
P12 17.00 usec  
P12R 17.00 usec  
P12M 90.18825531 M  
P11M 1.86379410 M  
SFO2 125.7878473 MHz

===== GRADIENT CHANNEL =====  
GPMAG[1] SINE-100  
GPMAG[2] SINE-100  
GPMAG[3] SINE-100  
GPMAG[4] SINE-100  
GP21 50.00 %  
GP22 20.10 %  
GP23 13.00 %  
GP24 5.00 %  
P13 500.00 usec

F1 - Acquisition parameters  
ID 001 125.788 MHz  
FIDRES 98.271851 Hz  
SW 200.000 ppm  
FWDRES Echo-Antiecho  
F2 - Processing parameters  
SI 1024  
SF 500.2000130 MHz  
GB 0 Hz  
PC 1.00

F1 - Processing parameters  
SI 1024  
M22 echo-antiecho  
SF 125.7733827 MHz  
GB 0 Hz

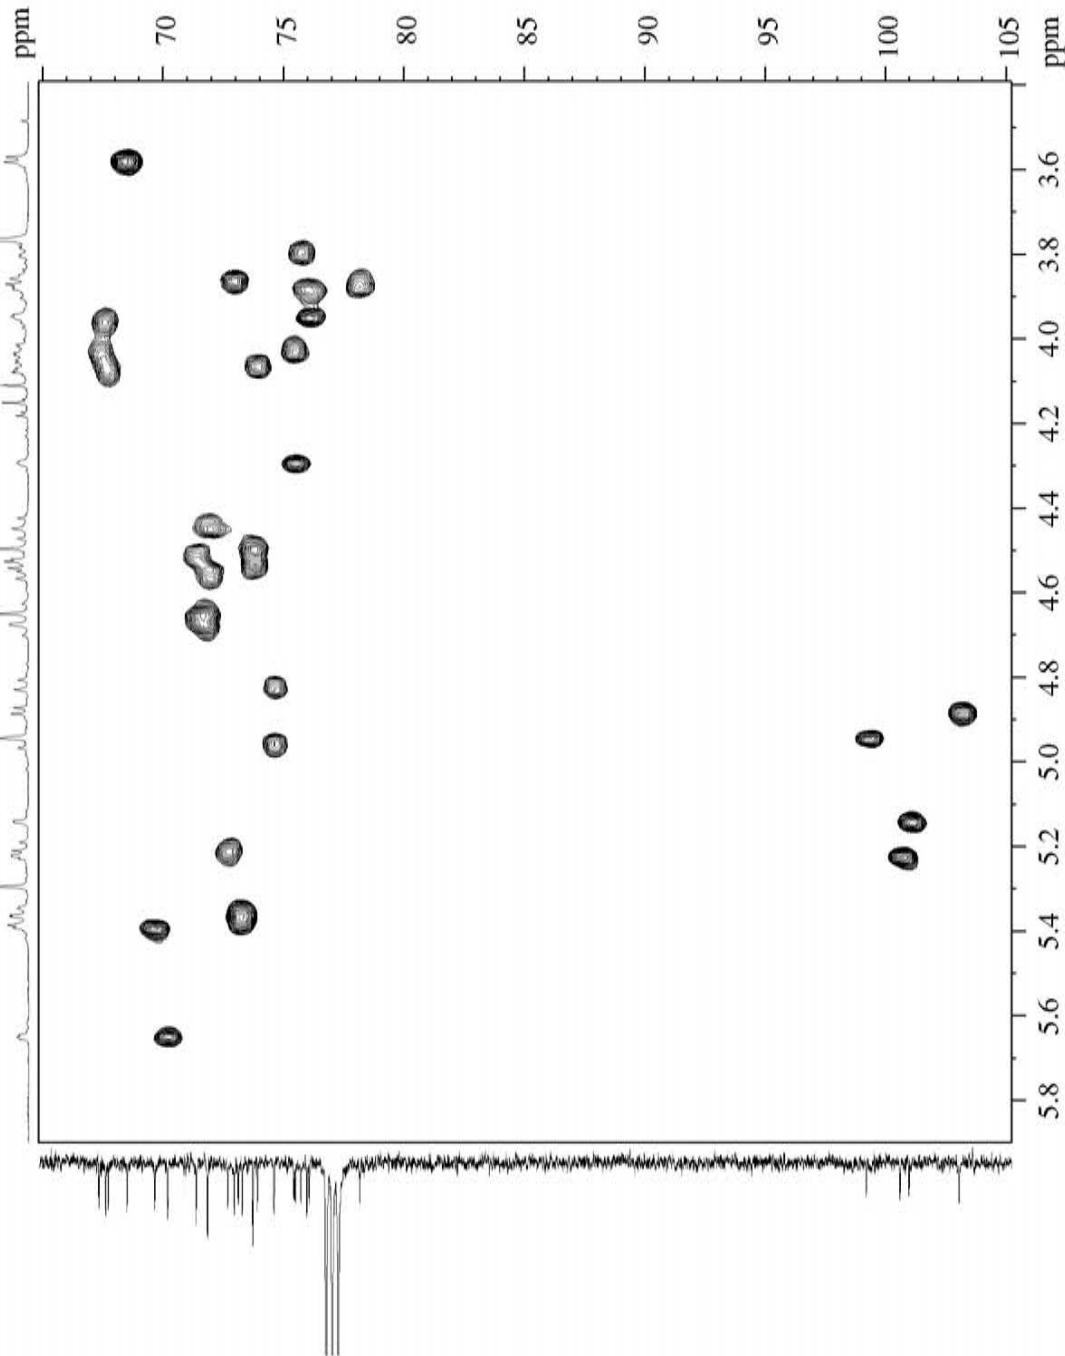

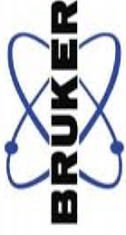

BM-VS-s22 in CDC13

8.112  
8.098  
8.043  
8.029  
7.990  
7.975  
7.496  
7.489  
7.402  
7.367  
7.314  
7.299  
7.295  
7.284  
7.275  
7.260  
7.228  
7.194  
7.189  
7.184  
7.181  
7.174  
7.170  
7.152  
7.137  
7.133  
7.011  
6.993  
6.800  
6.782  
5.389  
5.370  
5.352  
5.290  
4.720  
4.696  
4.531  
4.500  
3.876  
3.862  
3.766  
3.586  
3.574  
1.964  
1.281  
1.269  
1.168  
1.156  
1.113  
1.101

Current Data Parameters  
 NAME BM-VS-s22  
 EXPNO 40  
 PROCNO 1  
 F2 - Acquisition Parameters  
 Date\_ 20140805  
 Time 12.13  
 INSTRUM spect  
 PROBHD 5 mm PABBO BB-  
 PULPROG zg30  
 ID 65536  
 SOLVENT CDC13  
 NS 16  
 DS 2  
 SWH 10330.578 Hz  
 FIDRES 0.157632 Hz  
 AQ 3.1719425 sec  
 RG 45.2  
 DW 48.400 usec  
 DE 6.50 usec  
 TE 302.1 K  
 D1 1.00000000 sec  
 TD0 1  
 CHANNEL f1  
 NUC1 1H  
 P1 14.25 usec  
 PL1 1.30 dB  
 FLLW 15.30635643 W  
 SFO1 500.2030889 MHz  
 F2 - Processing parameters  
 SI 32768  
 SF 500.2000166 MHz  
 EM  
 WDW 0  
 SSB 0  
 LB 0.30 Hz  
 GB 0  
 PC 1.00

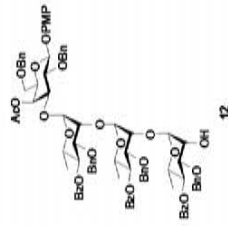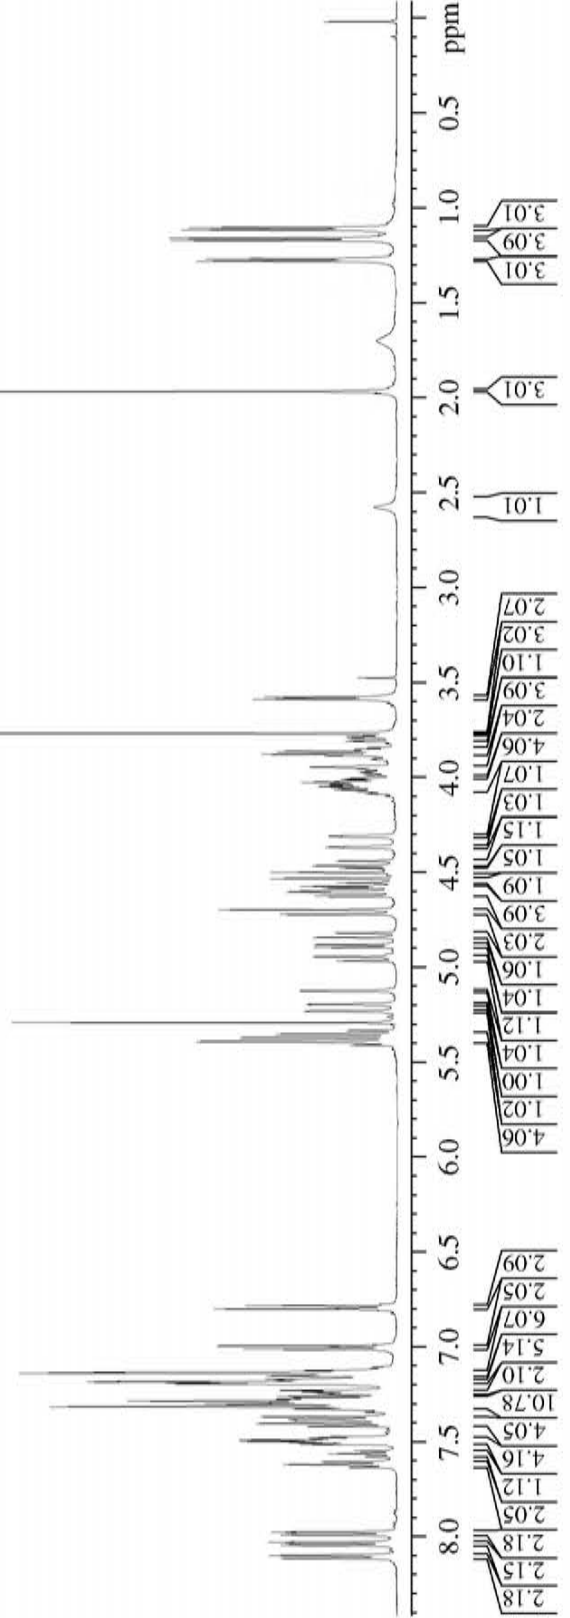

BM-VS-s22 in CDC13

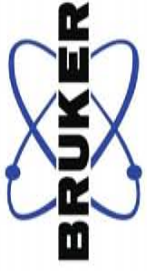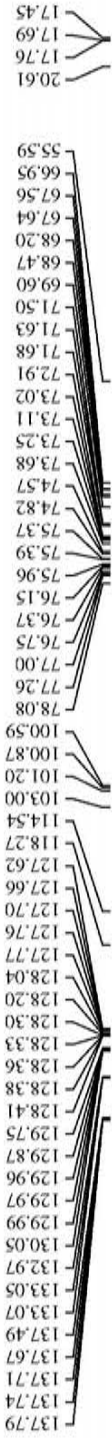

```

Current Data Parameters
NAME      BM-VS-s22
EXPNO     41
PROCNO    1

F2 - Acquisition Parameters
Date_     20140605
Time      12.15
INSTRUM   spect
PROBHD    5 mm FAPBO BB-
PULPROG   zgpg30
TD         65536
SOLVENT   CDC13
NS         359
DS         4
SWH        29761.904 Hz
FIDRES     0.454131 Hz
AQ          1.1010048 sec
RG          203
DW          16.800 usec
DE          6.50 usec
TE          302.7 K
D1          2.00000000 sec
D11         0.03000000 sec
TD0         1

===== CHANNEL f1 =====
NUC1       13C
P1         9.50 usec
PL1        0.150 dB
PL1W       90.18625531 W
SFO1       125.7879676 MHz

===== CHANNEL f2 =====
CDEPRG[2] waltz16
NUC2       1H
PCPD2      80.00 usec
PL2        1.30 dB
PL12       16.00 dB
PL13       20.00 dB
PL2W       15.30635643 W
PL12W      0.51864696 W
PL13W      0.20647706 W
SFO2       500.2020008 MHz

F2 - Processing parameters
SI         32768
SF         125.7753978 MHz
WDW        EM
SSB        0
LB         1.00 Hz
GB         0
PC         1.40
  
```

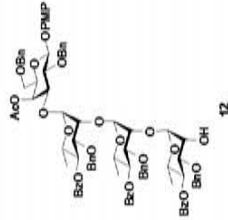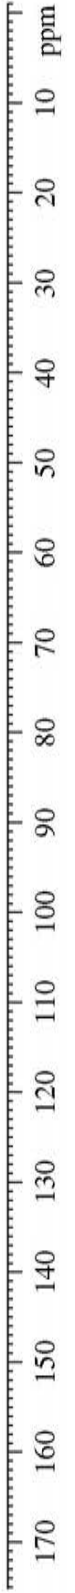

BM-VS-s22 in CDCl3

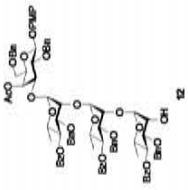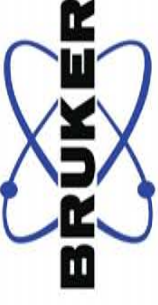

Current Data Parameters  
NAME BM-VS-s22  
EXPNO 42  
PROCNO 1

F2 - Acquisition Parameters  
Date\_ 20140805  
Time 12.34  
INSTRUM spect  
PROBHD 5 mm PABBO BB-  
PULPROG cosygpqr  
ID 2048  
SOLVENT CDCl3  
NS 1  
DS 8  
SMH 5000.000 Hz  
FIDRES 2.441406 Hz  
AQ 0.20498000 sec  
RG 45.2  
DM 100.000 usec  
DE 6.50 usec  
TE 302.15 K  
D0 0.00000000 sec  
D1 1.48683198 sec  
D12 0.00000000 sec  
D16 0.00000000 sec  
INV 0.00019990 sec

CHANNEL f1  
NUC1 1H  
P0 14.25 usec  
P1 14.25 usec  
PL1 1.30 dB  
PL1M 15.30635643 W  
SFO1 500.2023010 MHz

GRADIENT CHANNEL  
GPNAM(1) SINE.100  
GP21 10.00 \*  
p16 1000.00 usec

F1 - Acquisition Parameters  
TD 128  
SFO1 500.2025 MHz  
FIDRES 39.078320 Hz  
SH 10.000 ppm  
FmMODE CF

F2 - Processing Parameters  
SI 1024  
SF 500.2000134 MHz  
WDW SINE  
SSB 0  
LB 0 Hz  
GB 0  
PC 1.40

F1 - Processing parameters  
SI 1024  
MC2 CF  
SF 500.2000136 MHz  
WDW SINE  
SSB 0  
LB 0 Hz  
GB 0

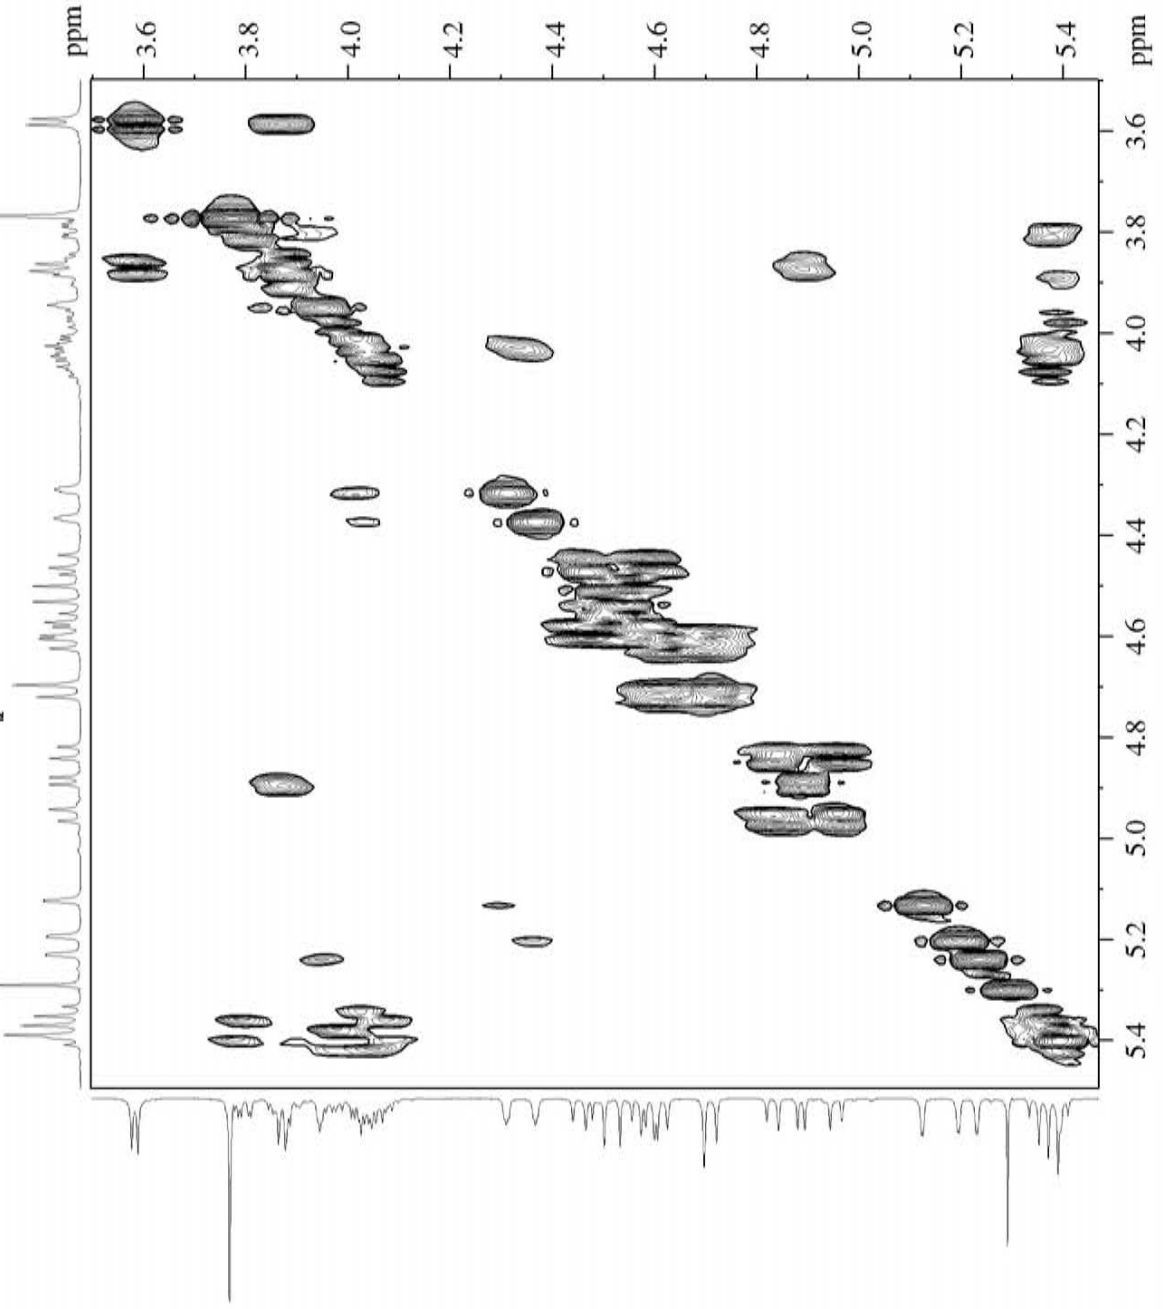

BM-VS-s22 in CDC13  
HSQC

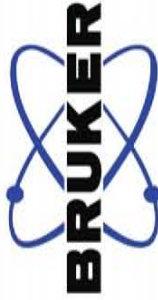

Current Data Parameters  
NAME: BM-VS-s22  
EXPNO: 43  
PROCNO: 1

F2 - Acquisition Parameters

Date\_ 20140805  
Time 12.39  
INSTRUM spect  
PROBHD 5 mm zgr301  
PULPROG zgpg30  
TD 1024  
SOLVENT CDCl3  
DS 4  
DE 16  
FIDRES 5000.000 Hz  
AQ 4.852813 Hz  
RG 0.1024000 sec  
WDW EM  
SSB 0  
LB 100.000 usec  
GB 6.50 usec  
TR 302.0 K  
CRST2 145.000000 sec  
D0 1.50000000 sec  
D1 1.50000000 sec  
D4 0.00172414 sec  
D11 0.03000000 sec  
D12 0.00004000 sec  
D13 0.03000000 sec  
D14 0.00066207 sec  
D15 0.00001985 sec  
ZDELTA 0

\*\*\*\*\* CHANNEL f1 \*\*\*\*\*

NUC1 1H  
P1 14.25 usec  
F2 28.50 usec  
P3 1.50 usec  
F4 1.50 usec  
P5 1.50 usec  
F5 15.30435643 W  
SF01 500.2025010 MHz  
\*\*\*\*\* CHANNEL f2 \*\*\*\*\*  
CPDPRG2 zgpg  
NUC2 13C  
P3 9.50 usec  
F4 19.00 usec  
P5 19.00 usec  
F5 -20.50 usec  
P6 17.00 usec  
F6 17.00 usec  
P7 90.18825531 W  
F8 11.60379910 W  
SF02 125.7679715 MHz  
\*\*\*\*\* GRADIENT CHANNEL \*\*\*\*\*  
GPM11 SINE.100  
GPM12 SINE.100  
GPM13 SINE.100  
GPM14 SINE.100  
GPM15 SINE.100  
GPR1 80.00 %  
GPR2 50.10 %  
GPR3 15.00 %  
GPR4 15.00 %  
P18 1000.00 usec  
P19 600.00 usec

F1 - Acquisition Parameters

TD 256  
SF01 125.768 MHz  
FIDRES 98.271851 Hz  
WDW EM  
SSB 0  
LB 0 Hz  
GB 0

F2 - Processing parameters

SI 1024  
WDW EM  
SSB 0  
LB 0 Hz  
GB 0  
PC 1.40

F1 - Processing parameters

SI 1024  
WDW EM  
SSB 0  
LB 0 Hz  
GB 0

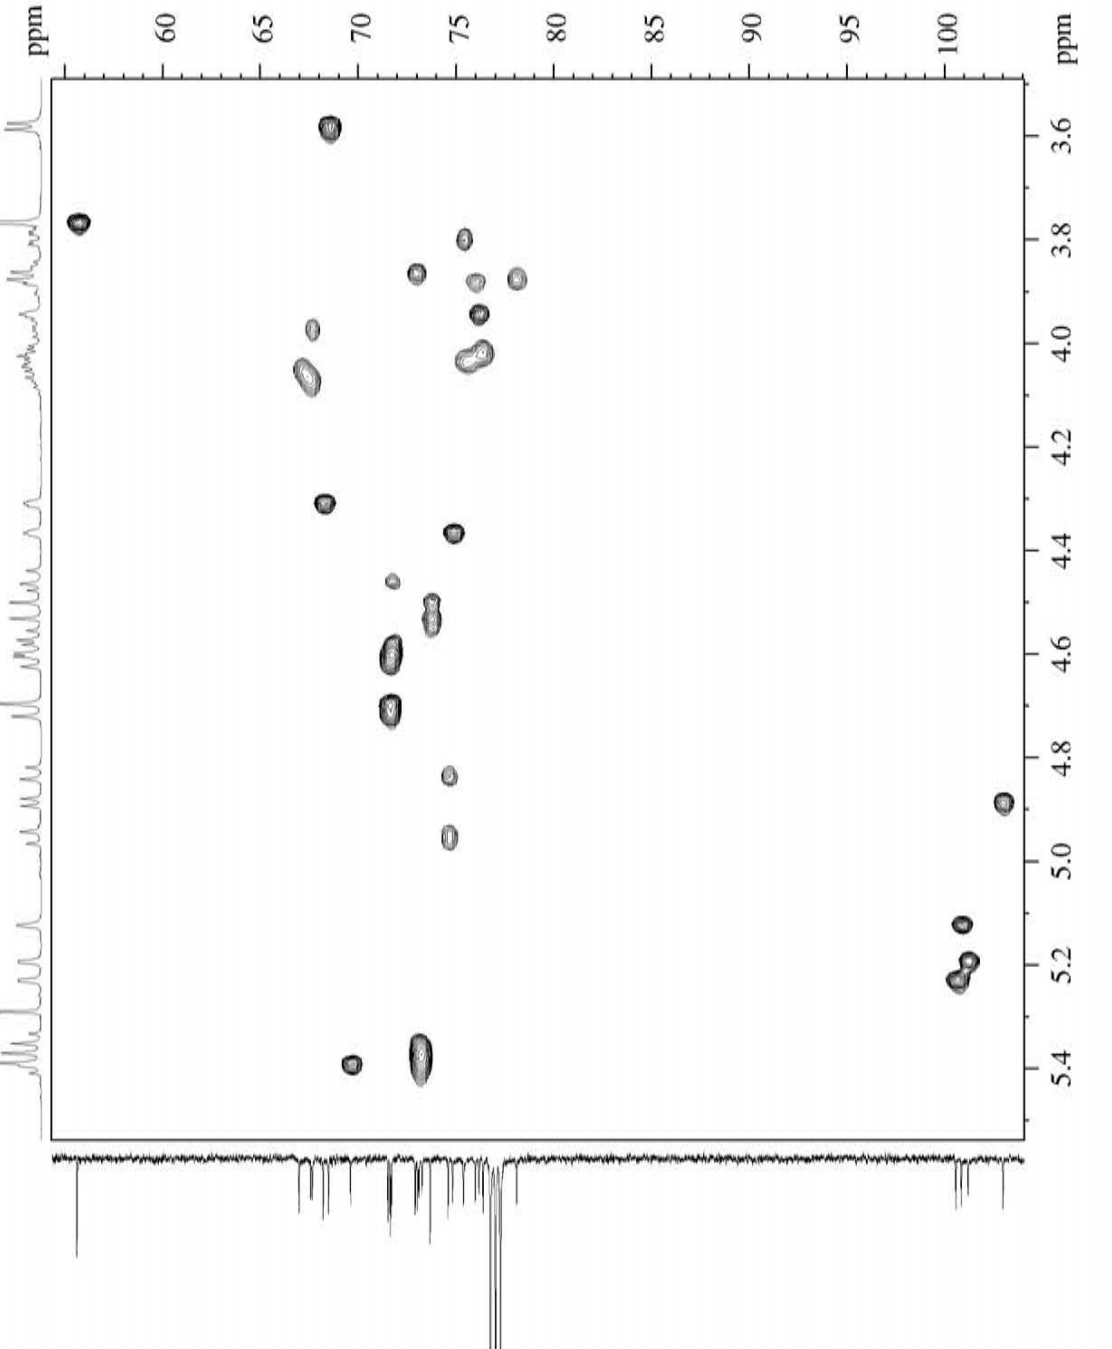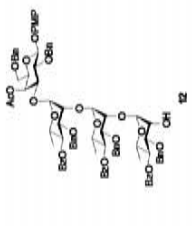

BM-VS-s24 in CDCl3

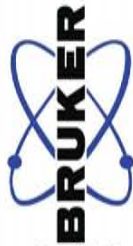

7.540  
7.524  
7.466  
7.464  
7.450  
7.416  
7.402  
7.399  
7.387  
7.380  
7.371  
7.368  
7.365  
7.360  
7.354  
7.348  
7.344  
7.338  
7.333  
7.329  
7.310  
7.293  
7.140  
7.124  
6.970  
6.953  
5.749  
5.743  
4.832  
4.810  
4.779  
4.683  
4.664  
4.561  
4.547  
4.538  
4.526  
4.437  
4.414  
4.120  
4.090  
4.045  
4.015  
3.849  
3.706  
3.700  
3.673  
3.654  
3.647  
3.636  
2.374

Current Data Parameters  
 NAME BM-VS-s24  
 ACQNO 40  
 PROCNO 1  
 F2 - Acquisition Parameters  
 Date\_ 20140902  
 Time 14.00  
 INSTRUM spect  
 PROBRD 5 mm PABBO BB-  
 PULPROG zg30  
 TD 65536  
 SOLVENT CDCl3  
 NS 12  
 DS 2  
 EQ 10330.572  
 FIDRES 0.137832 Hz  
 AQ 3.1719425 sec  
 RG 22.6  
 DW 48.400 usec  
 DE 6.50 usec  
 TE 301.3 K  
 D1 1.00000000 sec  
 TD0 1  
 ----- CHANNEL f1 -----  
 NUC1 1H  
 P1 14.25 usec  
 PL1 0.00  
 FLN 15.30635440 MHz  
 SFO1 500.2030689 MHz  
 F2 - Processing Parameters  
 SI 32768  
 SF 500.2000163 MHz  
 NLW EM  
 SSB 0  
 LB 0.30 Hz  
 GB 0  
 PC 1.00

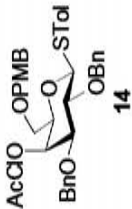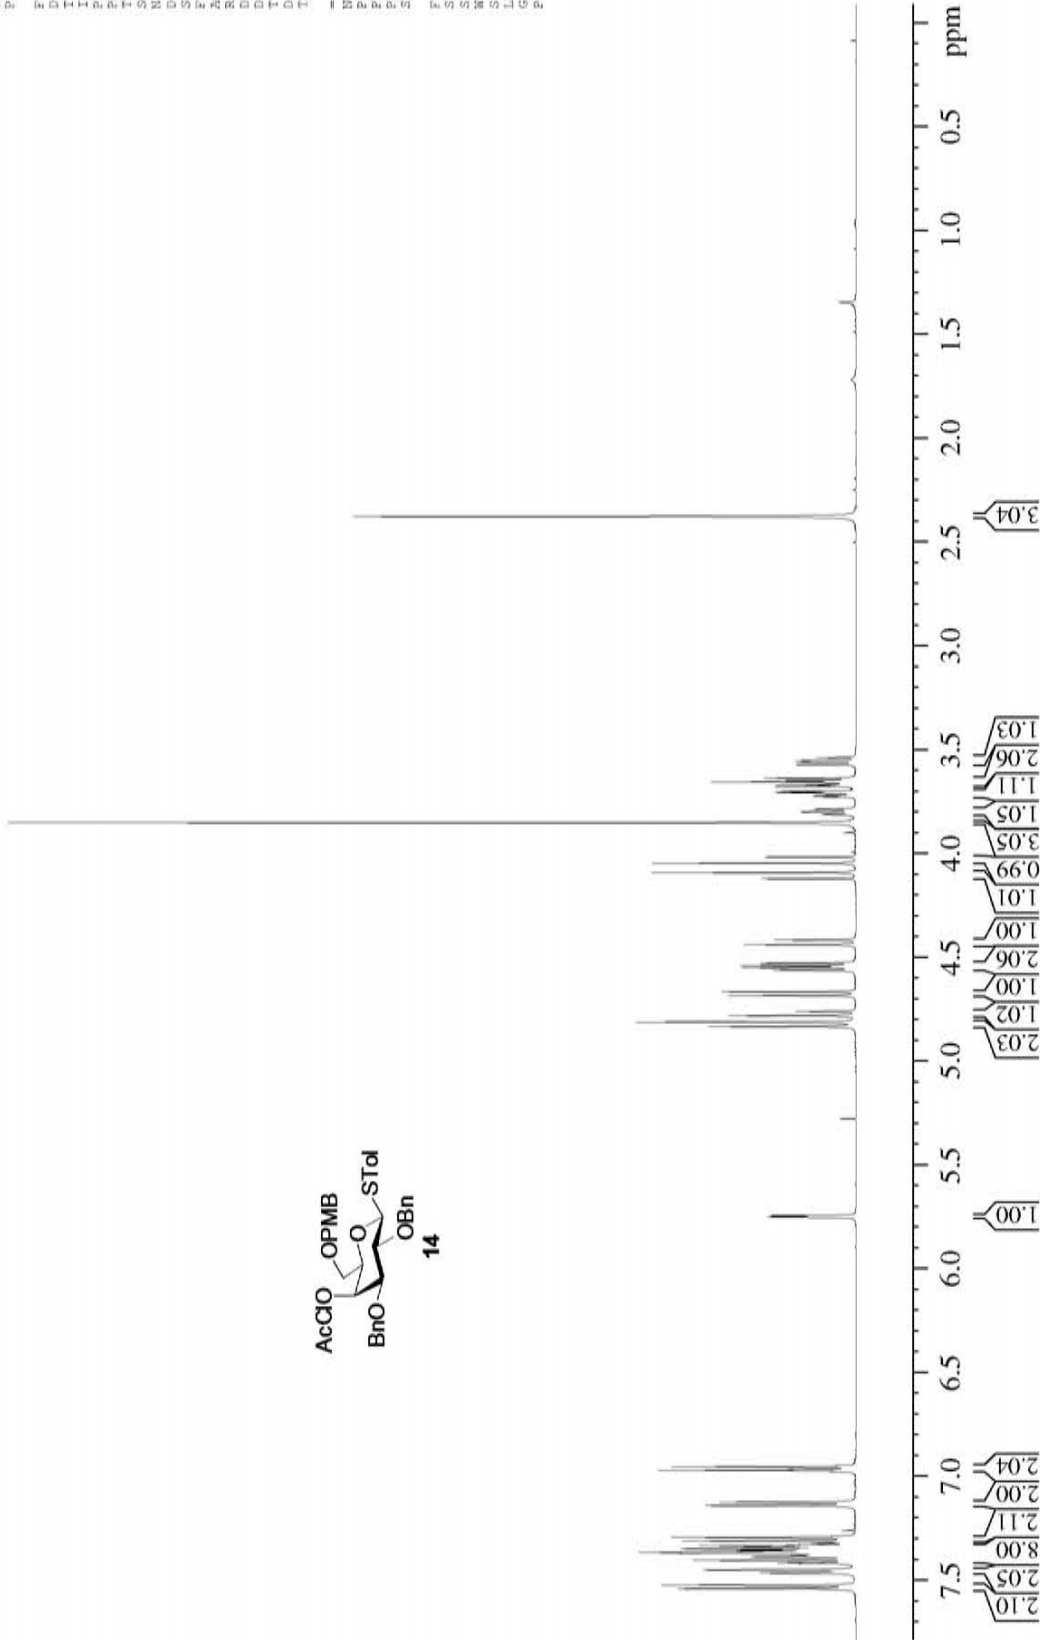

BM-VS-s24 in CDC13

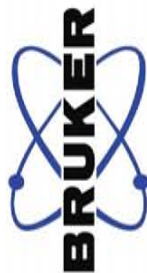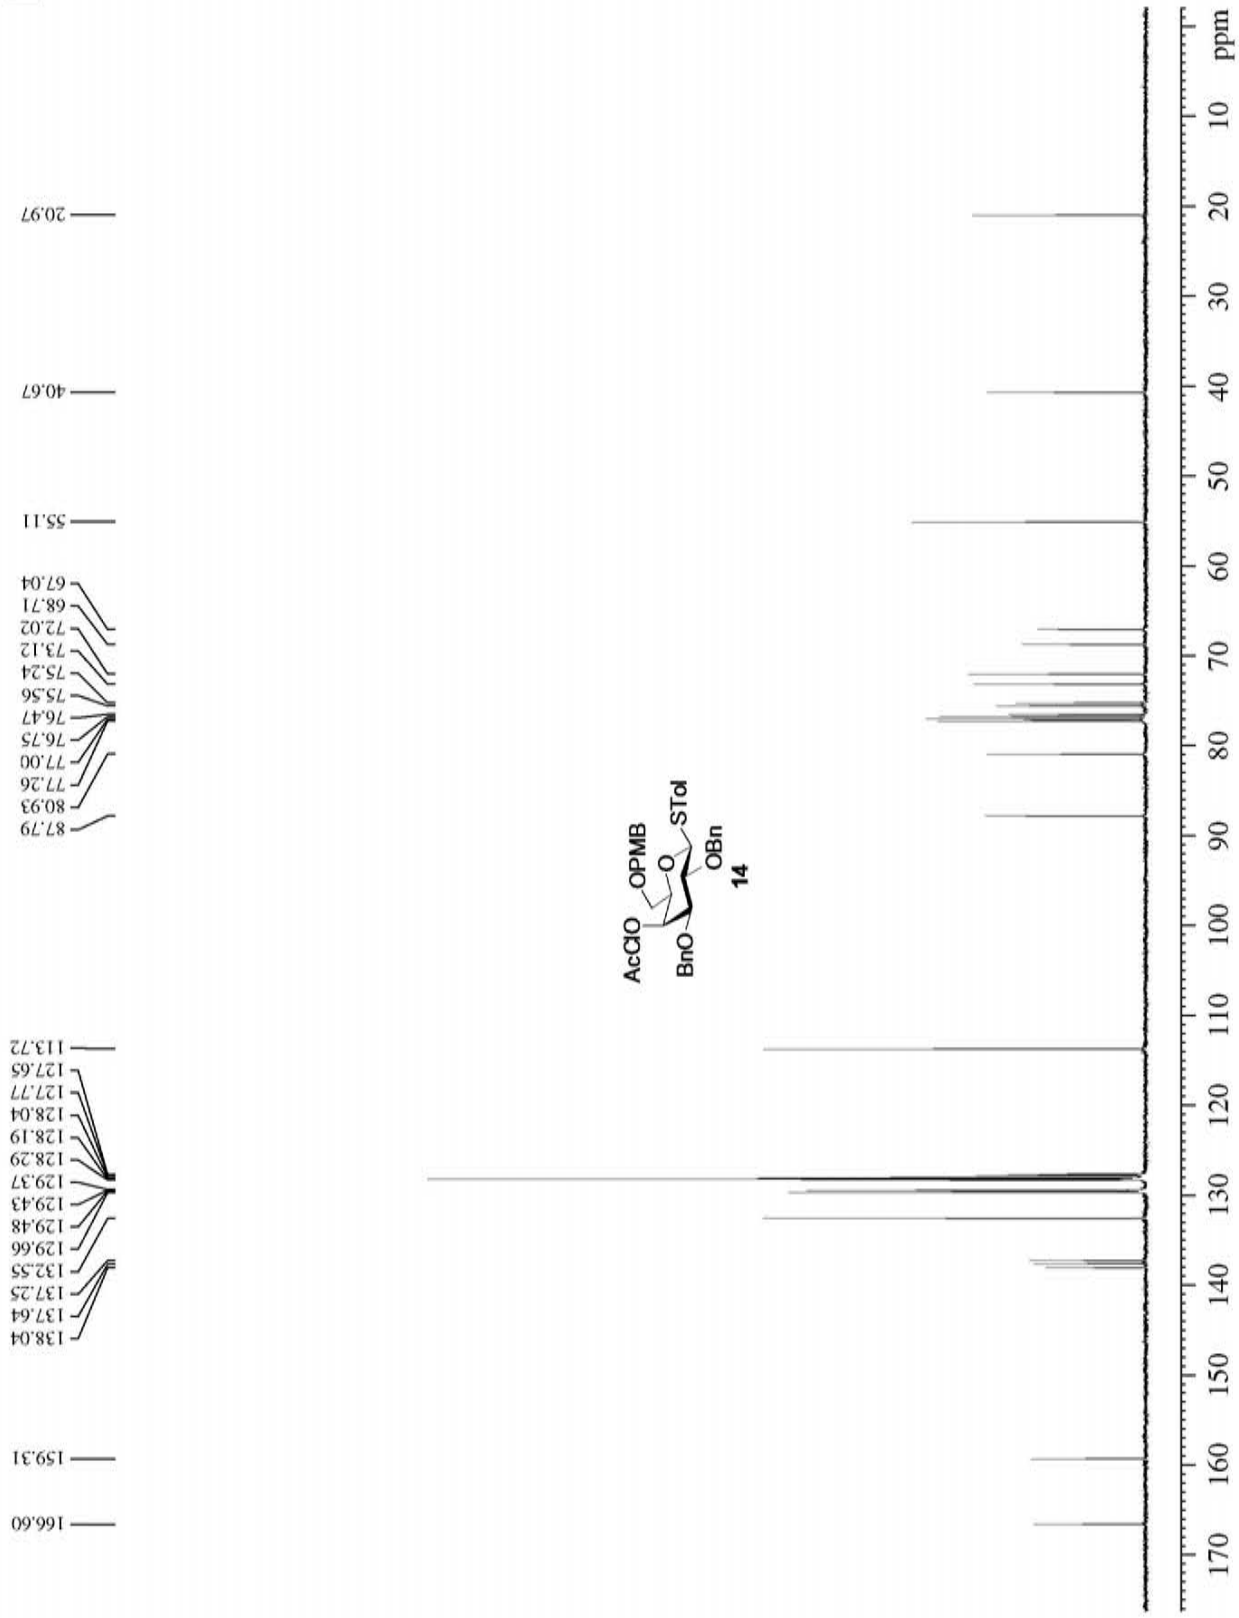

Current Data Parameters  
NAME BM-VS-s24  
EXPNO 41  
PROCNO 1  
F2 - Acquisition Parameters  
Date\_ 20160902  
Time 14:03  
INSTRUM spect  
PROBHD 5 mm PABBO BB-  
PULPROG zgpg30  
TD 65536  
SOLVENT CDC13  
NS 71  
DS 4  
SWE 25761.904 Hz  
FIDRES 0.454131 Hz  
AQ 1.1010048 sec  
RG 203  
DM 16.800 usec  
DE 6.50 usec  
TE 300.2 K  
D1 2.00000000 sec  
D11 0.03000000 sec  
TD0 1  
CHANNEL F1  
NUC1 13C  
P1 9.50 usec  
PL1 -0.50 dB  
PL1W 90.18625531 W  
SF01 125.7679676 MHz  
CHANNEL F2  
CPCPRG12 waltz16  
NUC2 1H  
P2 80.00 usec  
PL2 1.00 dB  
PL2W 0.00000000 W  
PL3 20.00 dB  
PL3W 15.30635643 W  
PL12N 0.51864696 M  
PL13N 0.20647706 M  
SF02 500.2620008 MHz  
F2 - Processing parameters  
SI 32768  
SF 125.7754214 MHz  
WDW EM  
SSS 0  
LB 0  
GB 0  
PC 1.40

BM-VS-s25r in CDCl3

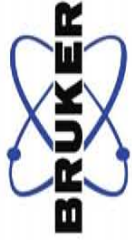

7.486  
7.478  
7.380  
7.365  
7.325  
7.315  
7.312  
7.301  
7.299  
7.295  
7.287  
7.284  
7.272  
7.268  
7.260  
7.253  
7.244  
7.229  
7.214  
7.211  
7.194  
7.172  
7.155  
7.141  
7.133  
7.129  
7.116  
7.108  
7.011  
6.783  
6.801  
6.808  
6.826  
6.826  
6.993  
6.993  
3.928  
3.873  
3.770  
3.731  
1.949  
1.285  
1.273  
1.180  
1.167  
1.093  
1.081

Current Data Parameters  
 NAME BM-VS-s25  
 EXPNO 20  
 PROCNO 1  
 F2 - Acquisition Parameters  
 Date\_ 20140904  
 Time 10:36  
 INSTRUM Spect  
 PROBED 5 mm PABBO BB  
 PULPROG zg30  
 TD 65536  
 SOLVENT CDCl3  
 NS 12  
 DS 2  
 SWH 10330.578 Hz  
 SFO 0.157632 Hz  
 FIDRES 3.1719425 sec  
 AQ 45.2  
 DW 48.400 usec  
 DE 6.50 usec  
 TE 298.3 K  
 D1 1.00000000 sec  
 D10  
 ===== CHANNEL f1 =====  
 NUC1 1H  
 P1 14.25 usec  
 PL1 1.30 dB  
 PL1W 15.30635643 W  
 SF01 500.2030889 MHz  
 F2 - Processing parameters  
 SI 32768  
 SF 500.200159 MHz  
 WGM 5M  
 SSB 0  
 LB 0.30 Hz  
 GB 0  
 PC 1.00

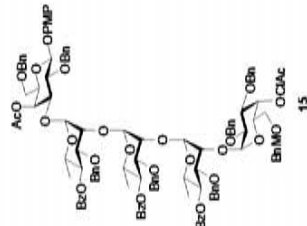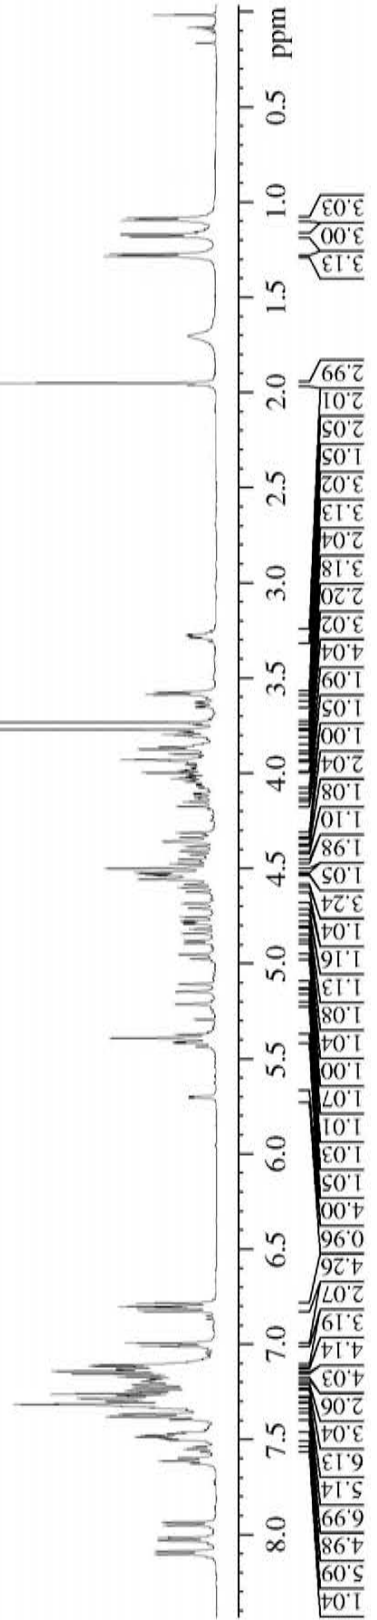



BM-VS-s25r in CDCl3

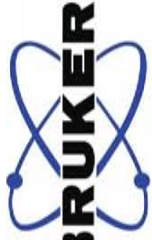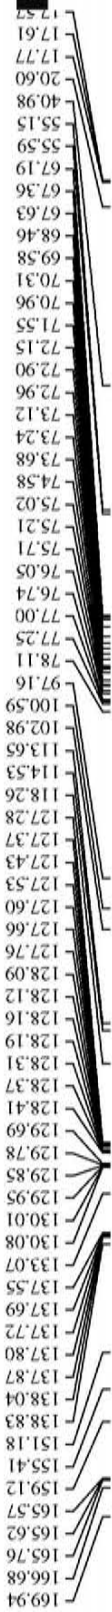

```

Current Data Parameters
NAME      BM-VS-s25
EXPNO    23
PROCNO   1

F2 - Acquisition Parameters
Date_    20140904
Time     10.58
INSTRUM spect
PROBHD   5 mm PABBO BB-
PULPROG zgpg30
TD       65536
SOLVENT CDCl3
NS       1024
DS       4
SWH      29761.904 Hz
FIDRES   0.454131 Hz
AQ       1.1010048 sec
RG       203
DM       16.000 usec
DE       6.50 usec
HE       300.42 K
H1       2.00000000 sec
D11      0.03000000 sec
TD0      1

===== CHANNEL f1 =====
NUC1      13C
P1        9.50 usec
PL1      -0.50 dB
PL12     90.18825531 W
PL13     125.7879676 MHz
SF01

===== CHANNEL f2 =====
CPDPRG2  wait16
NUC2      1H
PCPD2    80.00 usec
PL2      1.30 dB
PL12     16.00 dB
PL13     20.00 dB
PL14     15.30635643 W
PL15     0.51864696 W
PL16     0.20647706 W
SF02     500.2020008 MHz

F2 - Processing parameters
SI        32768
SF        125.7753975 MHz
MORF      EM
SSB       0
LB        1.00 Hz
GB        0
PC        1.40
    
```

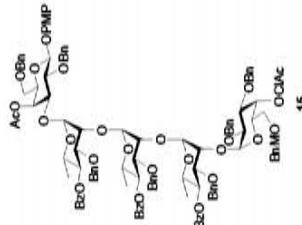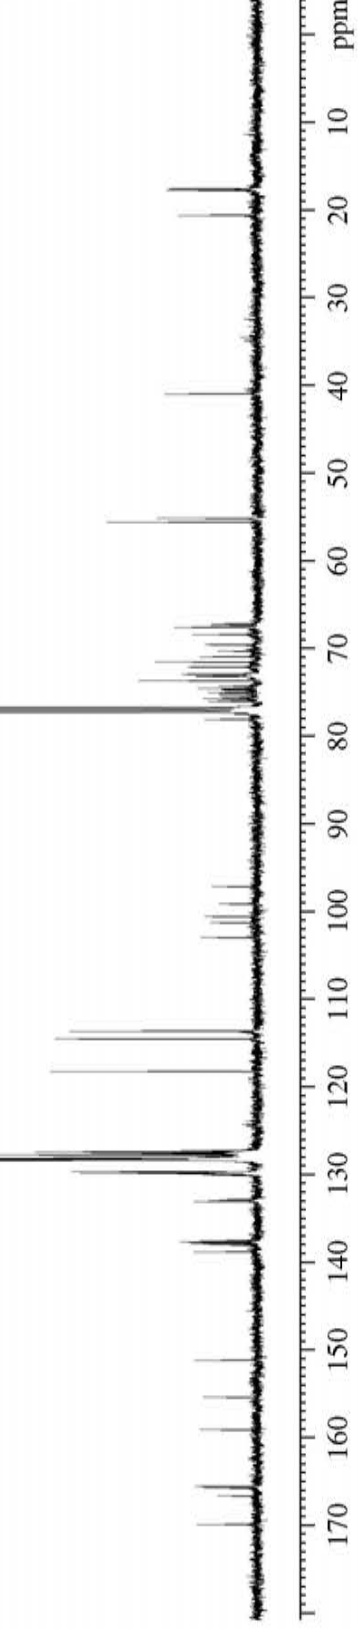

BM-VS-s25r in CDCl3

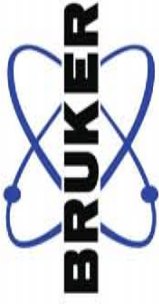

Current Data Parameters  
 NAME BM-VS-s25  
 EXPNO 21  
 PROCNO 1

F2 - Acquisition Parameters  
 Date\_ 20140904  
 Time\_ 10.37  
 INSTRUM spect  
 PROBD 5 mm PABBO BB-  
 PULPROG cosygpgf  
 TD 2048  
 SOLVENT CDCl3  
 NS 1  
 DS 8  
 SWH 5000.000 Hz  
 FIDRES 2.441406 Hz  
 AQ 0.2048000 sec  
 RG 45.2  
 DW 100.000 usec  
 DE 6.50 usec  
 TE 298.3 K  
 D0 0.00000300 sec  
 D1 1.4868198 sec  
 D13 0.00000400 sec  
 D16 0.0002000 sec  
 INO 0.00019990 sec

CHANNEL f1  
 NUC1 1H  
 P0 14.25 usec  
 P1 14.25 usec  
 P11 14.25 usec  
 P12 1.30 dB  
 P13 15.30635643 W  
 SFO1 500.2025010 MHz

GRADIENT CHANNEL  
 GPNAM[1] SINE.100  
 GPZ1 10.00 %  
 P16 1000.00 usec

F1 - Acquisition parameters  
 TD 128  
 SF01 500.2025 MHz  
 FIDRES 39.078320 Hz  
 SW 10.000 ppm  
 ENMODE QF

F2 - Processing parameters  
 SI 1024  
 SF 500.2000150 MHz  
 WDW SINE  
 SSB 0  
 LB 0 Hz  
 GB 0  
 PC 1.00

F1 - Processing parameters  
 SI 1024  
 MC2 QF  
 SF 500.2000144 MHz  
 WDW SINE  
 SSB 0  
 LB 0 Hz  
 GB 0

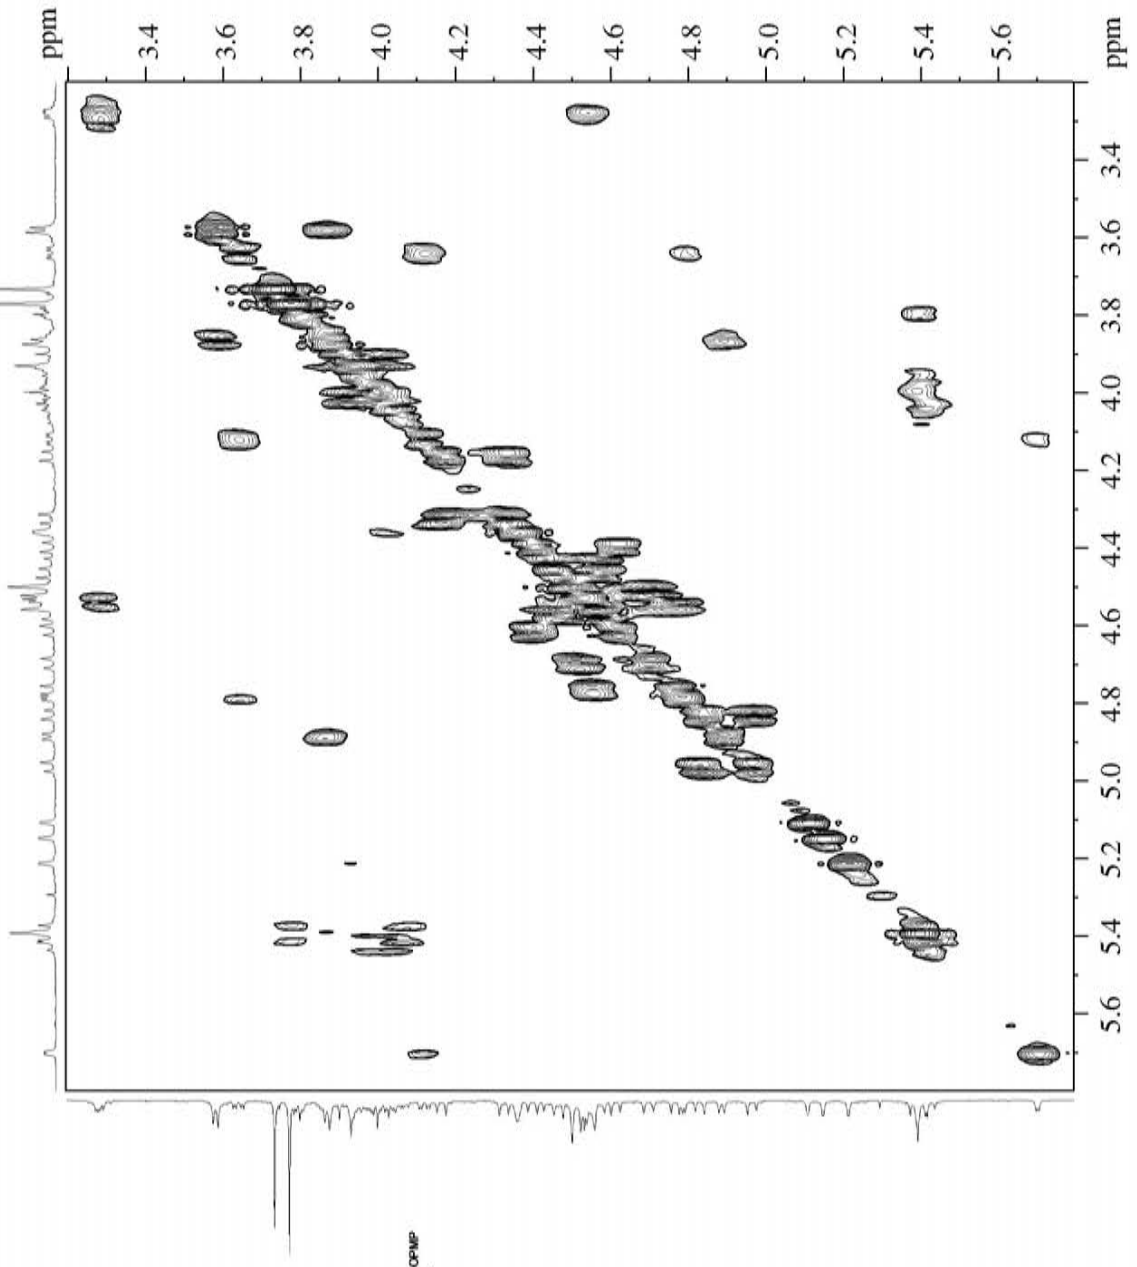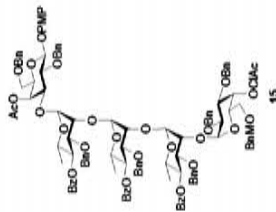

BM-VS-s25r in CDCl3  
HSQCGP

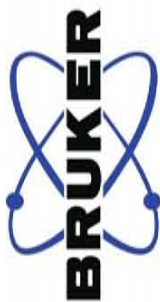

Current Data Parameters  
 NAME BM-VS-s25  
 EXPRNO 22  
 PROCNO 1

F1 - Acquisition Parameters  
 Date\_ 20140904  
 Time 10:43  
 INSTRUM spect  
 PROBHD 5 mm F4001 BBO  
 PULPROG zgpg30  
 TD 1024  
 SOLVENT CDCl3  
 NS 2  
 DS 2  
 SWH 5000.000 Hz  
 FIDRES 4.862813 Hz  
 AQ 0.1024000 sec  
 RG 451.2  
 DW 100.000 usec  
 DE 1.500 usec  
 TE 293.2 K  
 CHST2 145.0000000  
 D0 0.0000300 sec  
 D1 1.0000000 sec  
 D4 0.0017244 sec  
 D11 0.0300000 sec  
 D13 0.0000400 sec  
 D16 0.0002000 sec  
 D18 0.0000000 sec  
 D19 0.0001585 sec  
 D20 0.0001585 sec  
 SCANS 1

===== CHANNEL f1 =====  
 NUC1 1H  
 P1 14.25 usec  
 P2 28.50 usec  
 P3 0.10 usec  
 PL1 0.00 dB  
 PL2 15.7063530 dB  
 PL3 0.00 dB  
 SFO1 500.2625010 MHz

===== CHANNEL f2 =====  
 NUC2 13C  
 P3 9.50 usec  
 P4 19.00 usec  
 PCPD2 70.00 usec  
 PL1 0.00 dB  
 PL2 17.00 dB  
 PL3 0.00 dB  
 PL4 90.1824531 W  
 PL12W 1.6037310 W  
 SFO2 125.7673475 MHz

===== GRADIENT CHANNEL =====  
 GPRAM(1) SINE.100  
 GPRAM(2) SINE.100  
 GPRAM(3) SINE.100  
 GPRAM(4) SINE.100  
 GRD1 80.00 %  
 GRD2 20.10 %  
 GRD3 11.00 %  
 GRD4 5.00 %  
 GRD5 100.00 usec  
 GRD6 500.00 usec

F1 - Acquisition parameters  
 SI 1024  
 SF 500.1362795 MHz  
 FIDRES 222.633575 Hz  
 SFO 500.1362795 MHz  
 PULPROG zgpg30  
 ECHO antiecho

F2 - Processing parameters  
 SI 1024  
 SF 125.7673475 MHz  
 WDW EM  
 SSB 0 Hz  
 GB 0  
 PC 1.00

F1 - Processing parameters  
 SI 1024  
 MC2 echo-antiecho  
 SF 125.7673475 MHz  
 WDW EM  
 SSB 0 Hz  
 GB 0

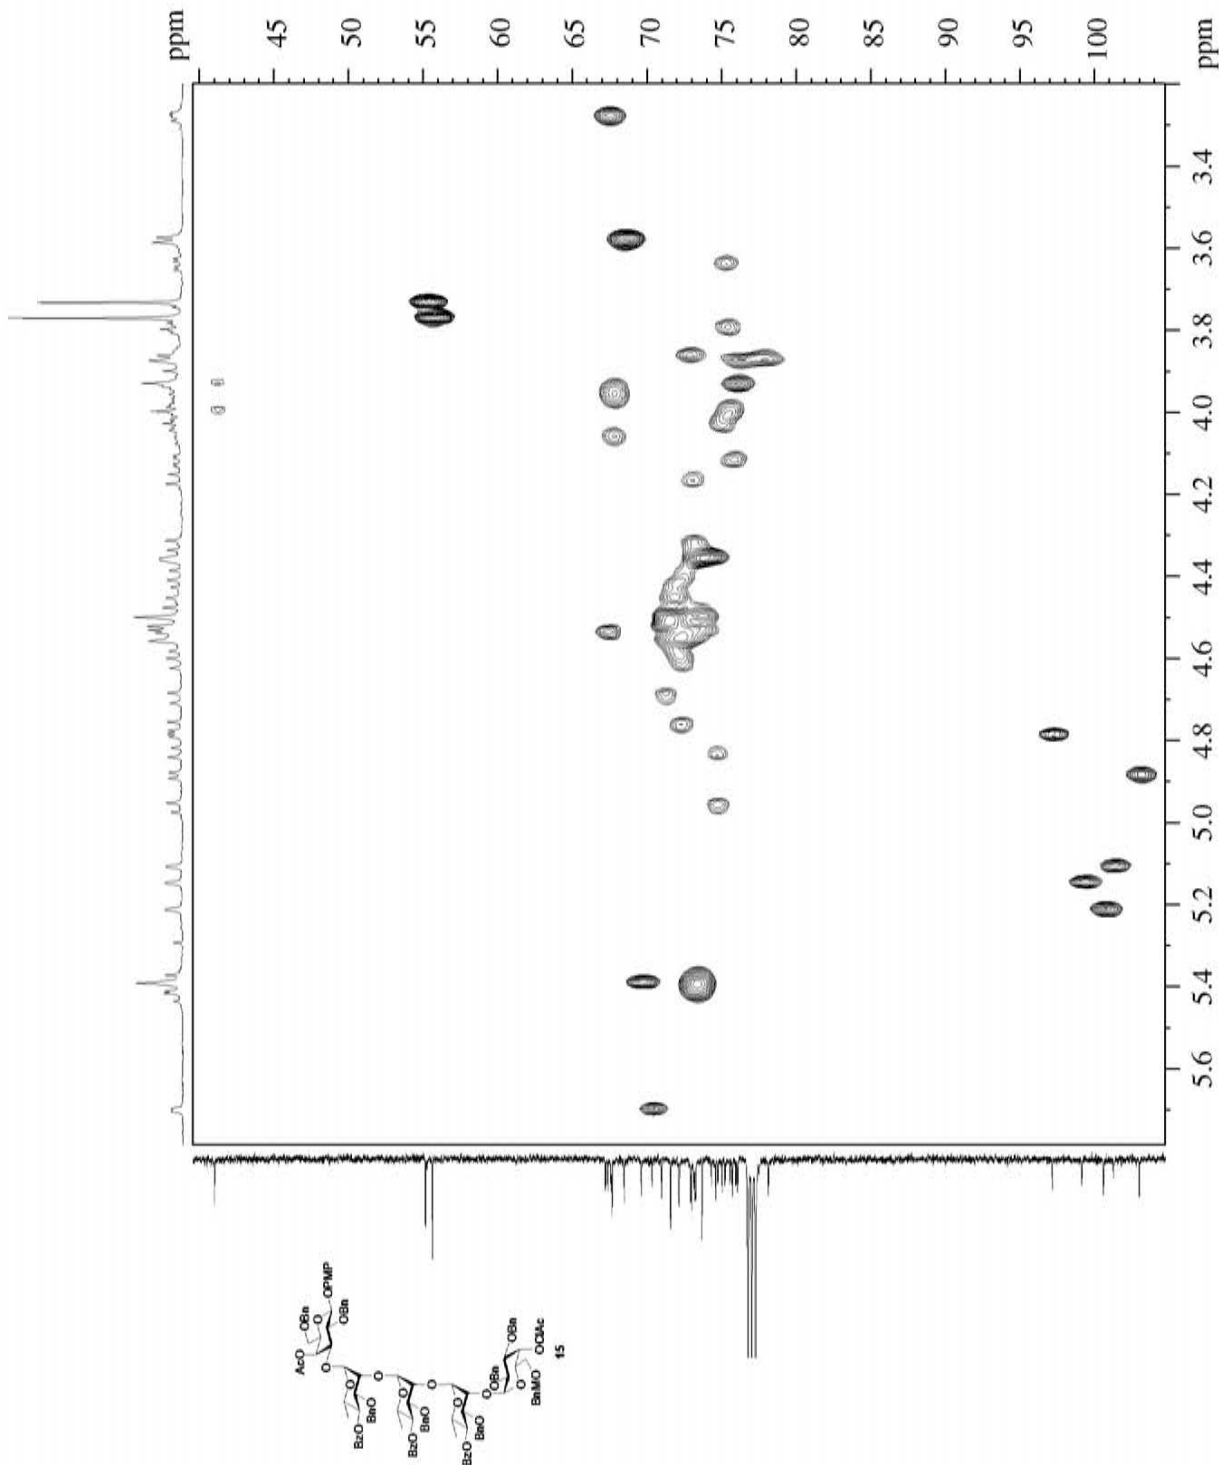

BM-VS-s26 in CDCl3

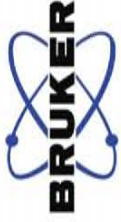

Current Data Parameters  
 NAME BM-VS-s26  
 EXPNO 60  
 PROCNO 1  
 F2 - Acquisition Parameters  
 Date\_ 20140908  
 Time 16:34  
 INSTRUM spect  
 PROBED 5 mm PABBO BB-  
 PULPROG zg30  
 ID 65536  
 SOLVENT CDCl3  
 NS 16  
 DS 2  
 SMH 10330.578 Hz  
 FIDRES 0.157632 Hz  
 AQ 3.171945 sec  
 RQ 0.0444  
 DN 48.400 usec  
 DE 6.50 usec  
 TE 303.1 K  
 D1 1.0000000 sec  
 IDU 1  
 CHANNEL f1  
 NUC1 1H  
 P1 14.25 usec  
 PL1 1.30 dB  
 PLL 15.30635643 W  
 SFO1 500.2030689 MHz  
 F2 - Processing parameters  
 SI 32768  
 SF 506.2000169 MHz  
 NCMF EM  
 SSB 0  
 LB 0  
 GB 0  
 PC 1.00

7.474  
7.461  
7.364  
7.351  
7.317  
7.304  
7.301  
7.291  
7.288  
7.266  
7.260  
7.251  
7.244  
7.191  
7.182  
7.164  
7.140  
7.135  
7.126  
7.121  
7.107  
7.104  
7.100  
7.094  
7.091  
6.999  
6.981  
6.790  
6.777  
6.772  
6.760  
5.379  
5.295  
4.543  
4.519  
4.490  
4.374  
3.857  
3.763  
3.700  
3.573  
3.561  
1.935  
1.274  
1.266  
1.265  
1.173  
1.160  
1.081  
1.069

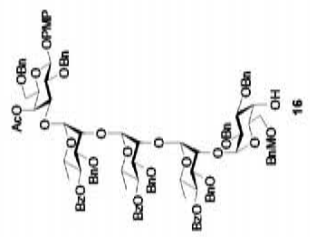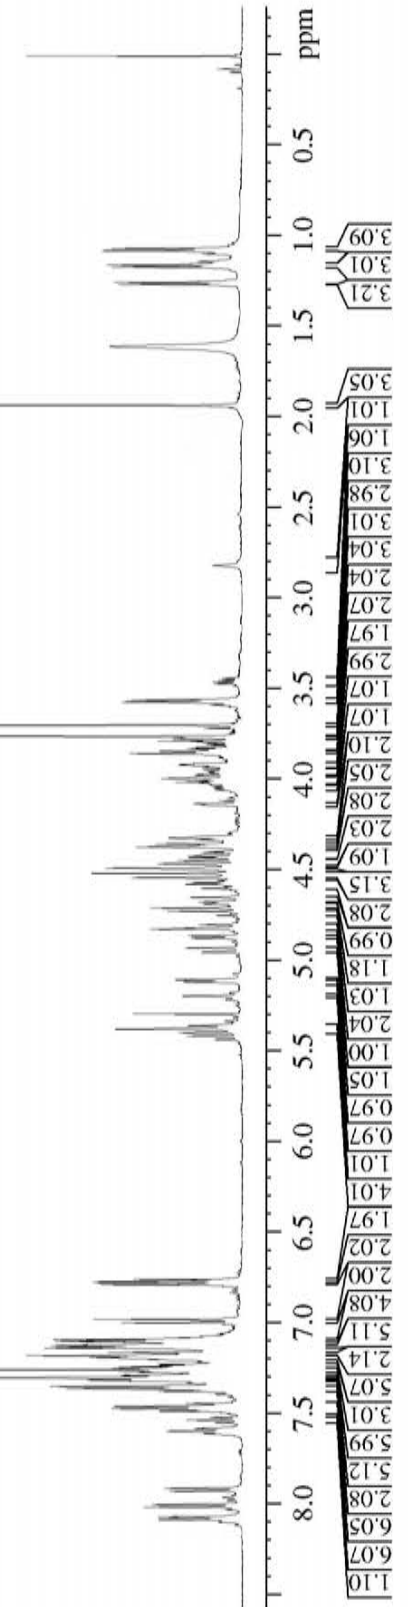

BM-VS-s26 in CDCl3

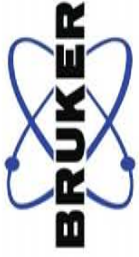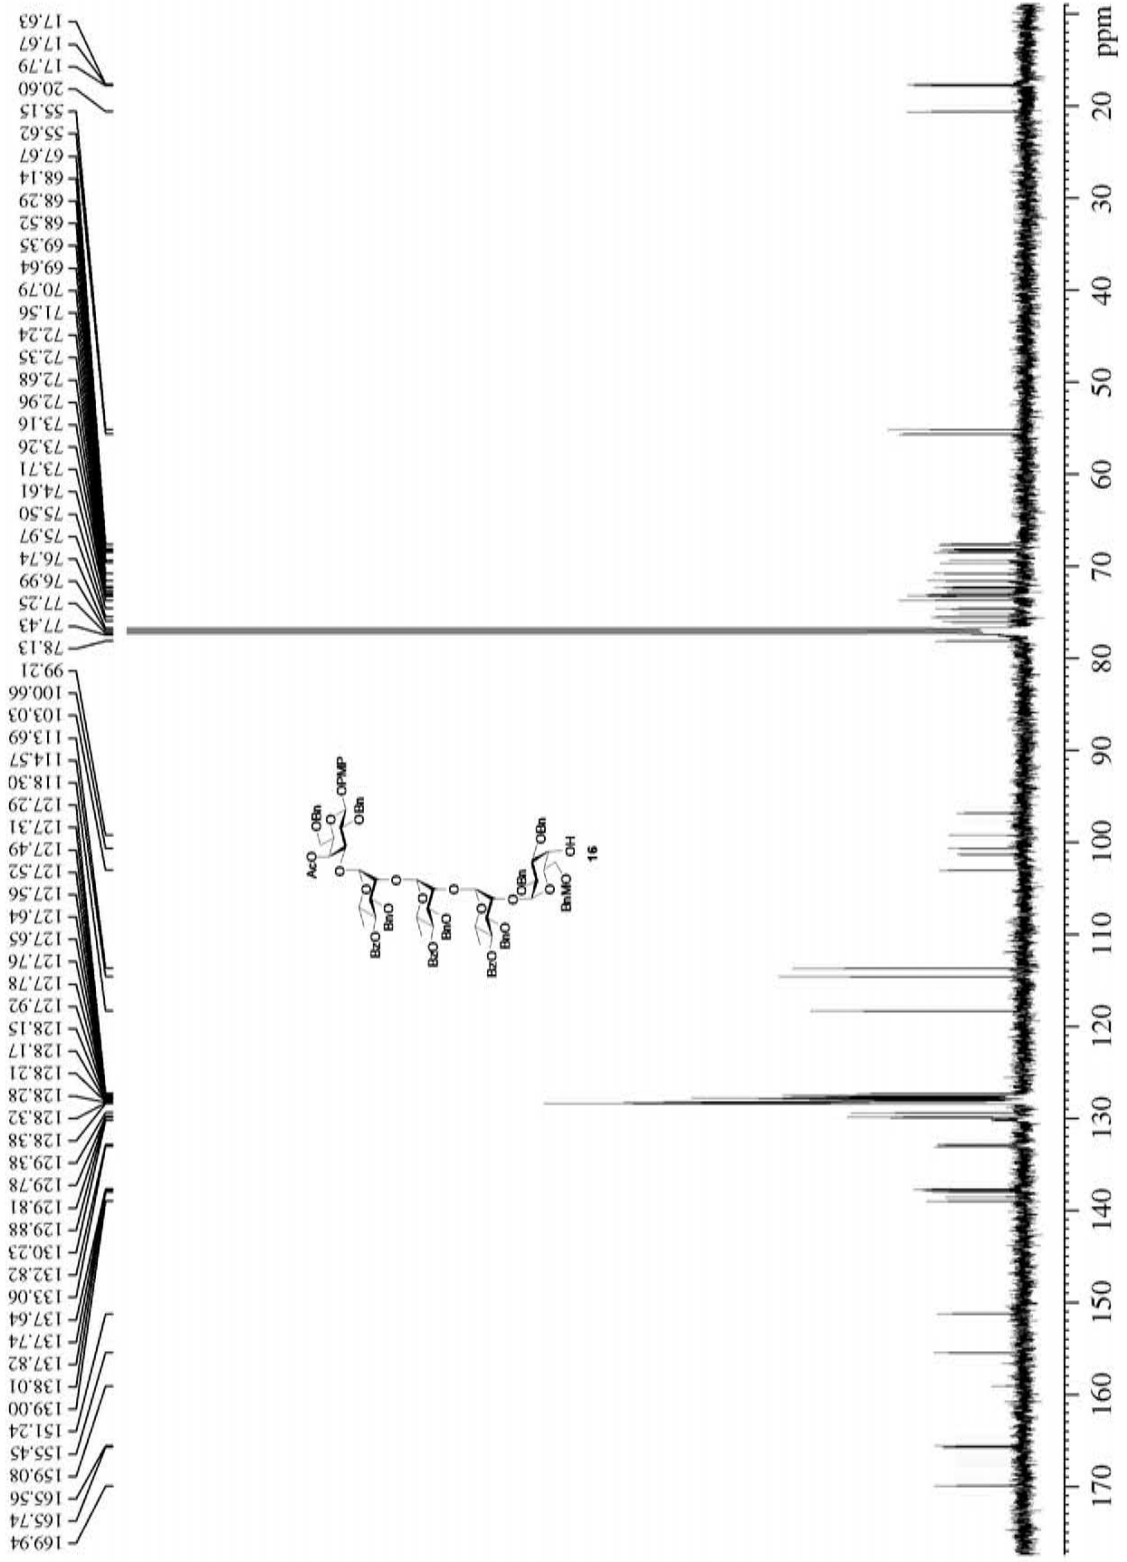

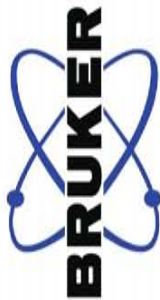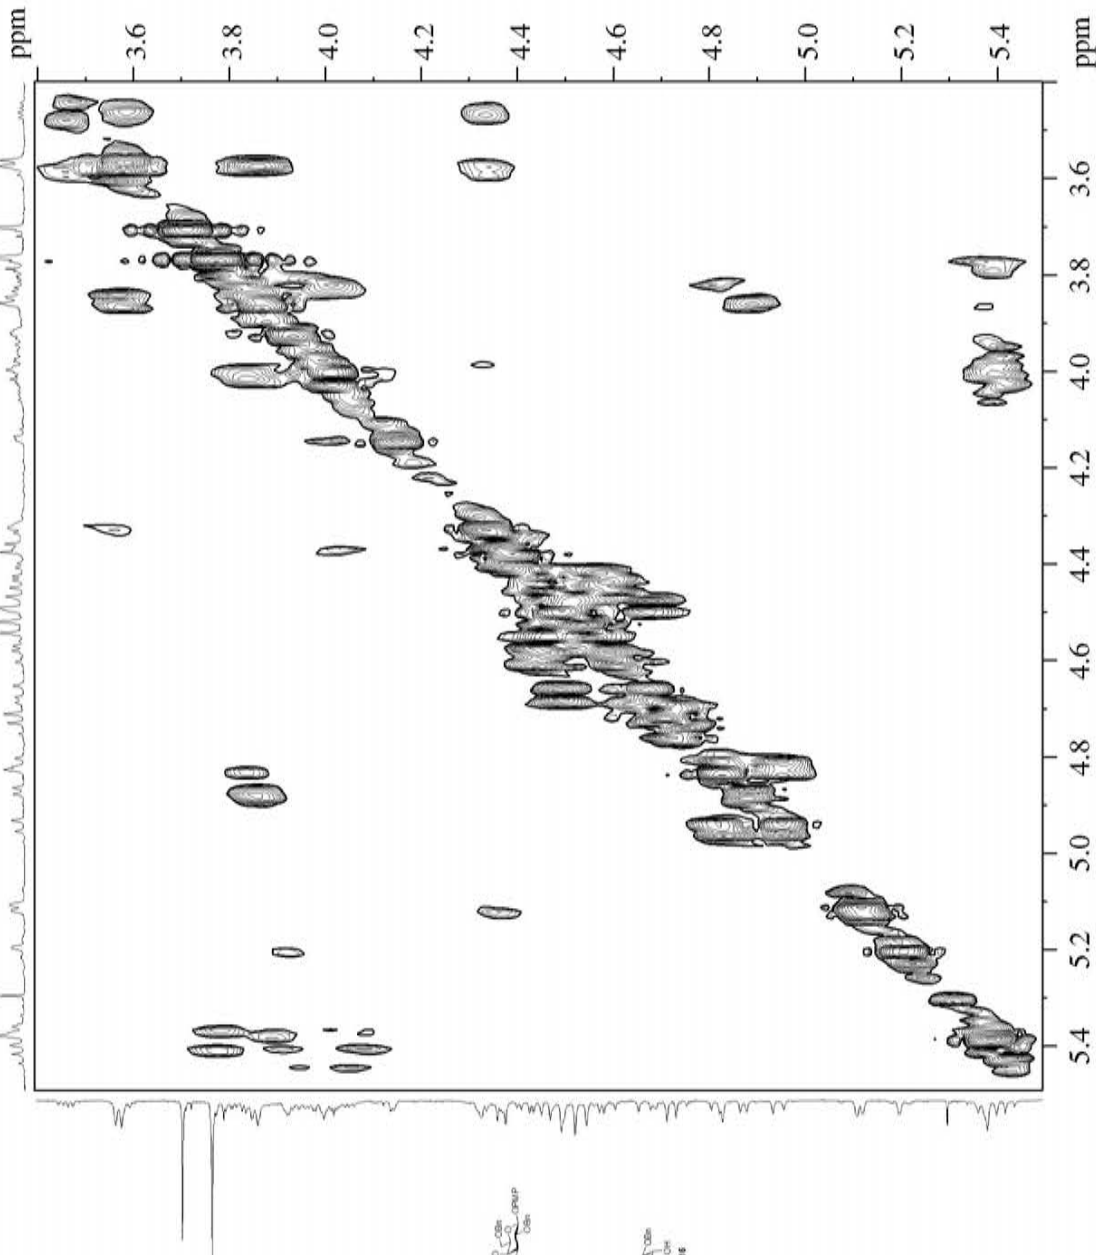

```

Current Data Parameters
NAME      BM-VS-s26
EXPNO    61
PROCNO   1

F2 - Acquisition Parameters
Date_    20140908
Time     15.35
INSTRUM  spect
PROBHD   5 mm PABBO BB-
PULPROG  cosygpgr
TD        2048
SOLVENT  CDC13
NS        1
DS        8
SMH       5000.000 Hz
FIDRES   2.441406 Hz
AQ        0.2048000 sec
RG        144
FW        100.000 usec
DE        6.50 usec
TE        303.1 K
D0        0.00000300 sec
D1        1.48689199 sec
D13       0.00000400 sec
D16       0.00020000 sec
INO       0.00019990 sec

===== CHANNEL f1 =====
NUC1      1H
P0        14.25 usec
P1        14.25 usec
P2        14.25 usec
PL1       1.30 dB
PL2       1.30 dB
PL12      15.30635643 W
SF01      500.2025010 MHz

===== GRADIENT CHANNEL =====
GPNAM[1]  SINE.100
GPZ1      10.00 %
P16       1000.00 usec

F1 - Acquisition parameters
TD        128
SF01      500.2025 MHz
FIDRES   39.076320 Hz
SW        10.000 ppm
ENHMODE   QF

F2 - Processing parameters
SI        1024
SF        500.2000126 MHz
WDW       SINE
SSB       0
LB        0 Hz
GB        0
PC        1.00

F1 - Processing parameters
SI        1024
MC2       QF
SF        500.2000131 MHz
WDW       SINE
SSB       0
LB        0 Hz
GB        0
    
```

BM-VS-s26 in CDC13  
HSQCGP

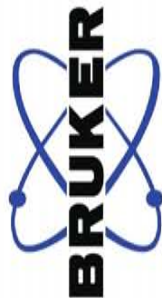

Current Data Parameters  
NAME BM-VS-s26  
EXPNO 62  
PROCNO 1

F2 - Acquisition Parameters  
Date\_ 20140906  
Time 16:40  
INSTRUM spect  
PULPROG zgpg30  
PROCNO 1  
TD 1024  
SOLVENT CDC13  
DS 4  
DS2 1  
DS3 1  
SFO1 500.0000 MHz  
F1RES 4.882813 Hz  
AQ 0.1024000 sec  
RG 327.5  
WM 100.000 usec  
WB 6.50 usec  
TE 303.2 K  
CRST2 145.000000 sec  
DE 1.00000000  
D1 1.50000000 sec  
D4 0.00172414 sec  
D11 0.03000000 sec  
D13 0.00000000 sec  
D15 0.00000000 sec  
D24 0.0006207 sec  
INVO 0.00001583 sec  
EXORF2S

===== CHANNEL f1 =====  
NUC1 1H  
P1 14.23 usec  
P2 28.50 usec  
P3 1.0 usec  
P4 1.0 usec  
P11M 15.365543 M  
SFO1 500.0025010 MHz  
===== CHANNEL f2 =====  
CPDPRG2 gpcp  
NUC2 13C  
P3 9.50 usec  
P4 19.00 usec  
P5 9.50 usec  
P6 20.50 usec  
P11 1.00 usec  
P112 17.00 usec  
P12W 90.18825531 M  
P13W 1.0319910 M  
SFO2 125.7697675 MHz

===== GRADIENT CHANNEL =====  
GPMN[1] SINE-100  
GPMN[2] SINE-100  
GPMN[3] SINE-100  
GPMN[4] SINE-100  
GR21 80.00 %  
GR22 20.10 %  
GR23 14.90 %  
GR24 4.00 %  
P15 1000.00 usec  
P16 600.00 usec  
P17 600.00 usec  
F1 - Acquisition parameters  
TD 256  
SFO1 125.768 MHz  
F1RES 98.271853 Hz  
AQ 200.000 ppm  
PULPROG Echo-AnticHo  
F2 - Processing parameters  
SI 1024  
SF 500.0000112 MHz  
WDW EM  
SSB 0 Hz  
L8 0 Hz  
L9 1.00  
F1 - Processing parameters  
SI 1024  
SF 125.7700000 MHz  
WDW EM  
SSB 0 Hz  
L8 0 Hz  
L9 0

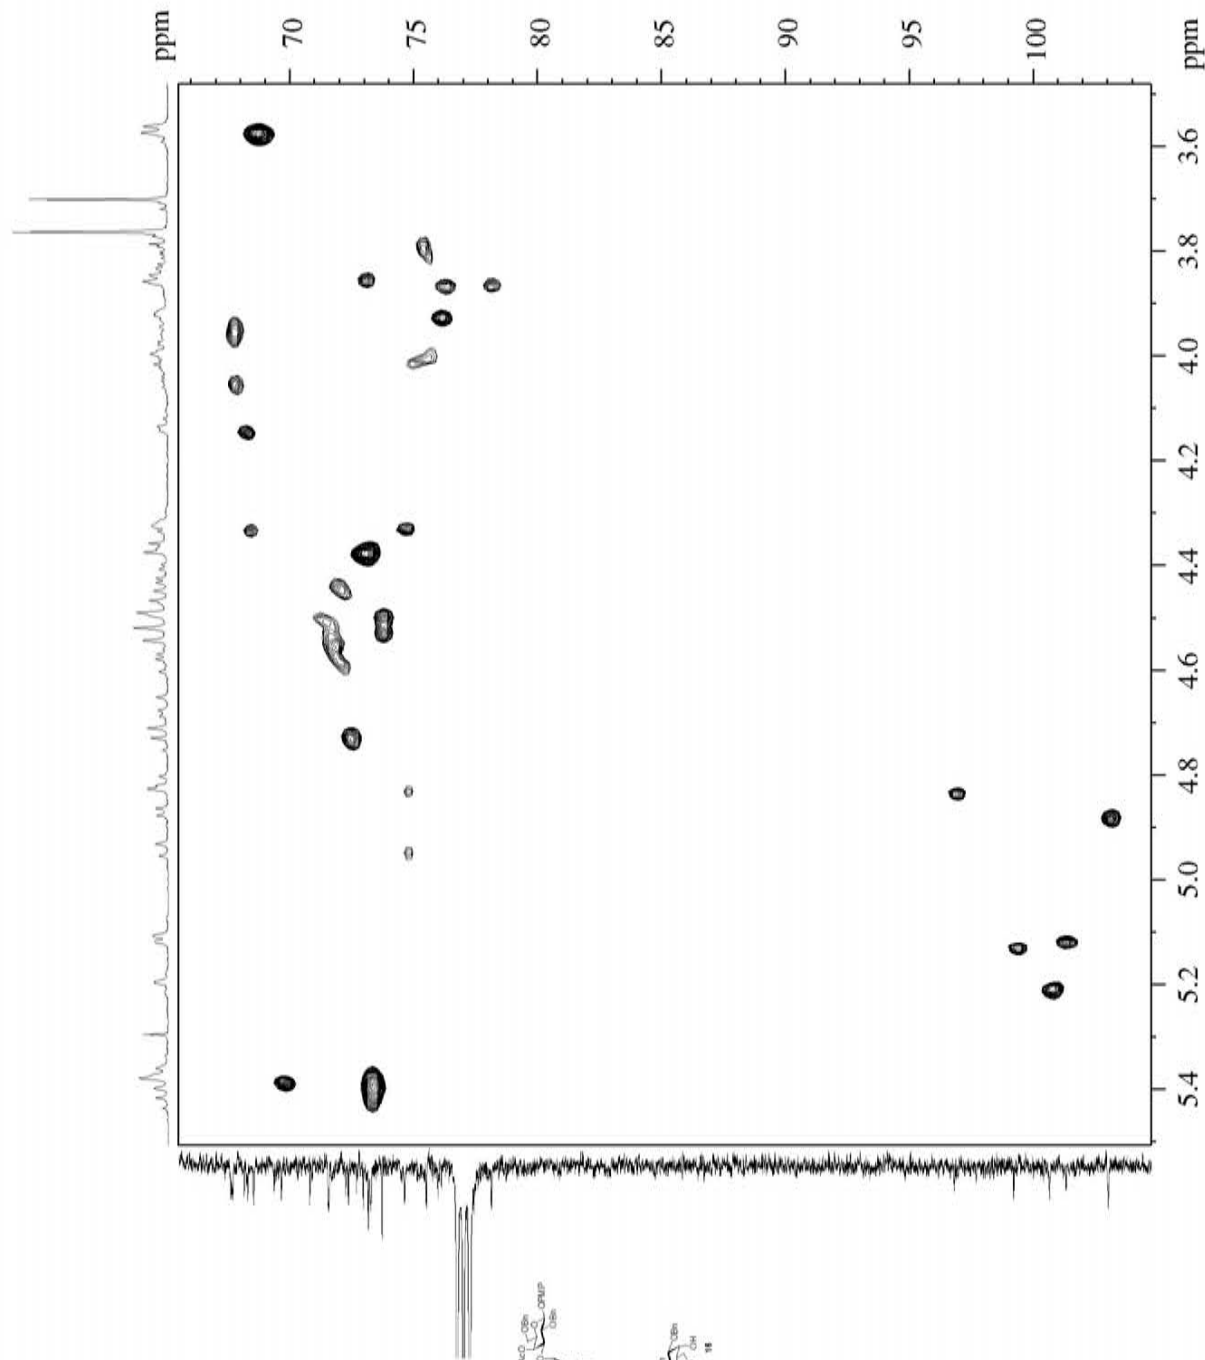

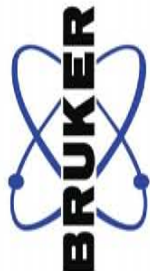

BM-VS-s28 in CDCl3

8.097  
8.041  
7.616  
7.493  
7.487  
7.385  
7.371  
7.333  
7.322  
7.308  
7.296  
7.277  
7.267  
7.260  
7.249  
7.237  
7.222  
7.209  
7.195  
7.179  
7.136  
7.126  
7.115  
7.023  
7.005  
6.809  
6.791  
6.763  
5.396  
4.538  
4.506  
3.882  
3.870  
3.773  
3.667  
3.594  
3.582  
2.060  
2.011  
1.997  
1.959  
1.302  
1.290  
1.174  
1.162  
1.135  
1.123  
1.097  
1.085

Current Data Parameters  
 NAME BM-VS-s28  
 EXPNO 10  
 PROCNO 1

F2 - Acquisition Parameters  
 Date\_ 20180915  
 Time 10:38  
 INSTRUM spect  
 PROBRD 5 mm PABBO-SE  
 PULPROG zgpg30  
 TD 65536  
 SOLVENT CDCl3  
 NS 16  
 DS 2  
 SWH 10330.578 Hz  
 FIDRES 0.157632 Hz  
 AQ 3.1719425 sec  
 RG 36  
 DW 48.400 usec  
 DE 6.50 usec  
 TE 296.9 K  
 D1 1.00000000 sec  
 TD0 1

===== CHANNEL f1 =====  
 NUC1 1H  
 P1 14.25 usec  
 PL1 1.30 dB  
 PL1W 15.30635643 W  
 SF01 500.2330891 MHz

F2 - Processing parameters  
 SI 32768  
 SF 500.2300153 MHz  
 SW 0  
 SE 0  
 LB 0.30 Hz  
 GB 0  
 PC 1.00

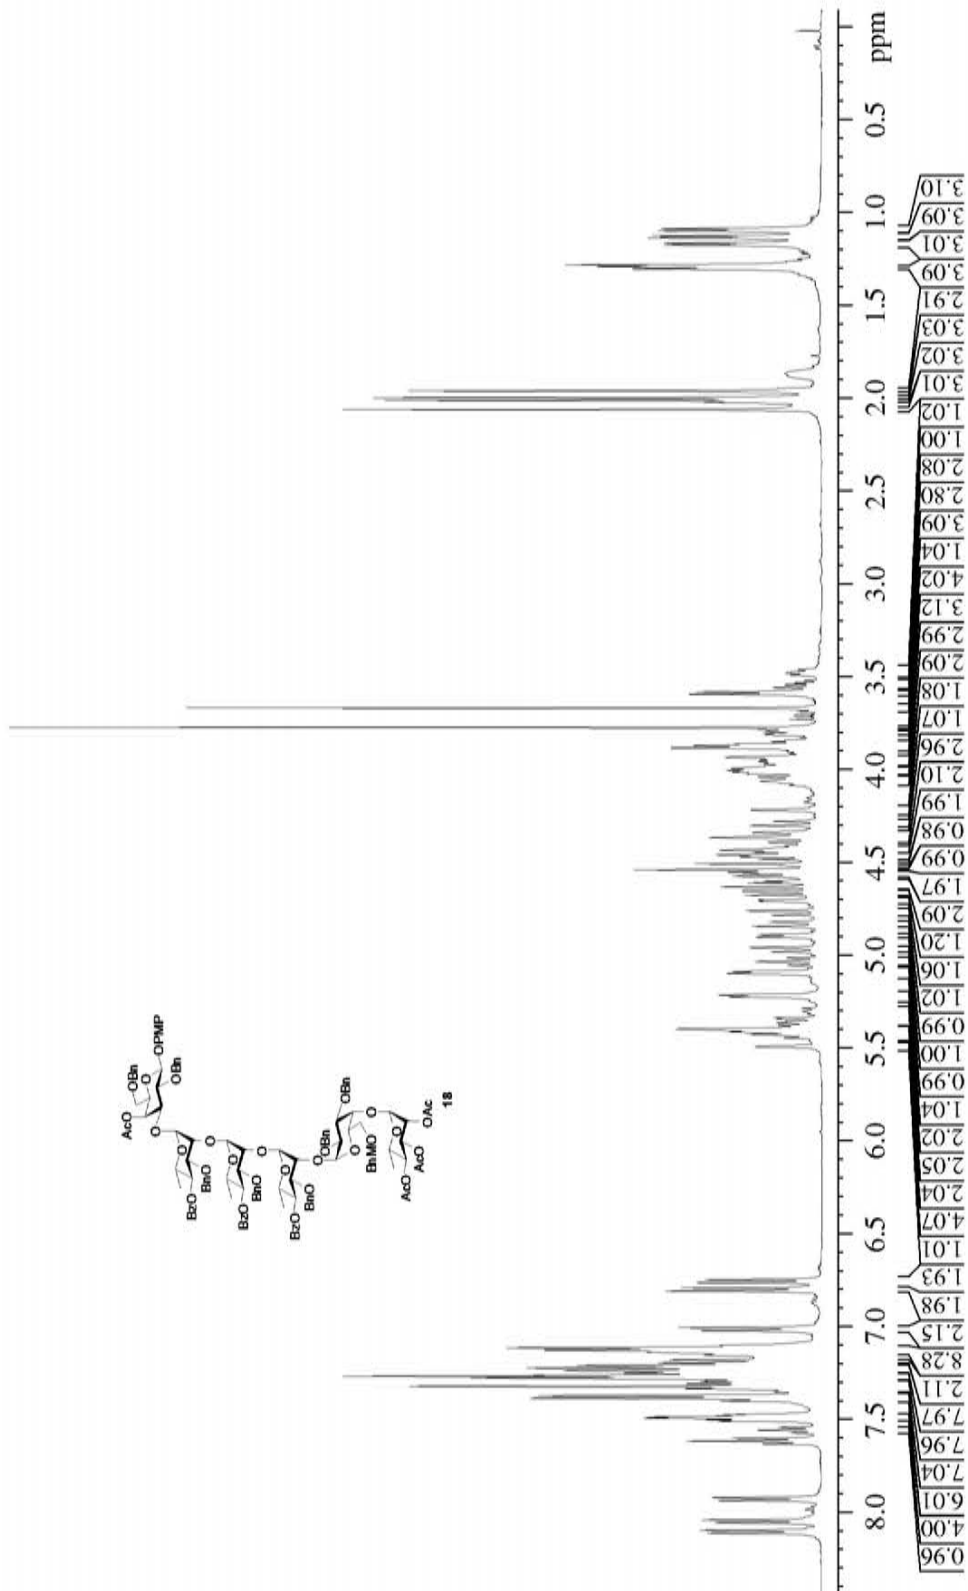

|      |
|------|
| 0.96 |
| 4.00 |
| 6.01 |
| 7.04 |
| 7.96 |
| 7.97 |
| 8.28 |
| 2.15 |
| 1.98 |
| 1.93 |
| 1.01 |
| 4.07 |
| 2.04 |
| 2.05 |
| 2.02 |
| 1.04 |
| 0.99 |
| 1.00 |
| 0.99 |
| 1.02 |
| 1.06 |
| 1.20 |
| 2.09 |
| 1.97 |
| 0.99 |
| 0.98 |
| 1.99 |
| 2.10 |
| 2.96 |
| 1.07 |
| 1.08 |
| 2.09 |
| 2.99 |
| 3.12 |
| 4.02 |
| 1.04 |
| 3.09 |
| 2.80 |
| 2.08 |
| 1.00 |
| 1.02 |
| 3.01 |
| 3.02 |
| 3.03 |
| 2.91 |
| 3.09 |
| 3.01 |
| 3.01 |
| 3.09 |
| 3.10 |



BM-VS-s28 in CDCl3

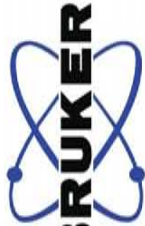

170.00  
169.91  
169.72  
169.54  
165.53  
158.91  
155.35  
151.15  
138.96  
138.47  
137.94  
137.74  
137.65  
137.47  
133.04  
129.97  
129.83  
129.79  
129.21  
128.44  
128.37  
128.34  
128.27  
128.19  
128.15  
128.12  
128.10  
128.06  
127.78  
127.74  
127.72  
127.70  
127.62  
127.51  
127.23  
127.09  
118.21  
114.48  
113.54  
102.93  
98.61  
87.08  
78.08  
77.25  
76.99  
76.74  
76.04  
74.58  
73.64  
73.06  
72.87  
72.74  
72.55  
71.64  
71.47  
70.36  
69.72  
69.55  
69.38  
68.43  
67.53  
55.55  
55.02  
20.81  
20.78  
20.73  
20.57  
17.75  
17.61  
17.57  
17.40

```

Current Data Parameters
Name      BM-VS-s28
EXPNO    1
PROCNO   1

F2 - Acquisition Parameters
Date_    20140915
Time     10.41
INSTRUM  spect
PROBHD   5 mm PABBO BB-
PULPROG  zgpg30
TD        65536
SOLVENT  CDCl3
NS        651
DS        4
SWH       25761.904 Hz
FIDRES    0.454131 Hz
AQ         1.1010048 sec
RG         203
DW         16.800 usec
DE         6.50 usec
TE        300.2 K
D1         2.0000000 sec
d11        0.0300000 sec
TD0        1

===== CHANNEL f1 =====
NUC1      13C
P1        9.50 usec
PL1       -0.50 dB
PL12      90.1825531 W
SFO1      125.7625000 MHz

===== CHANNEL f2 =====
CPDPRG2   waltz16
NUC2      1H
P2        80.00 usec
PL2       1.30 dB
PL12      16.00 dB
PL13      20.00 dB
PL14      15.30635643 W
PL15      0.51064596 W
PL16      0.27570000 W
SFO2      500.2320009 MHz

F2 - Processing parameters
SI        32768
SF        125.7625000 MHz
WDW       EM
SSB       0
LB        1.00 Hz
GB        0
PC        1.40
  
```

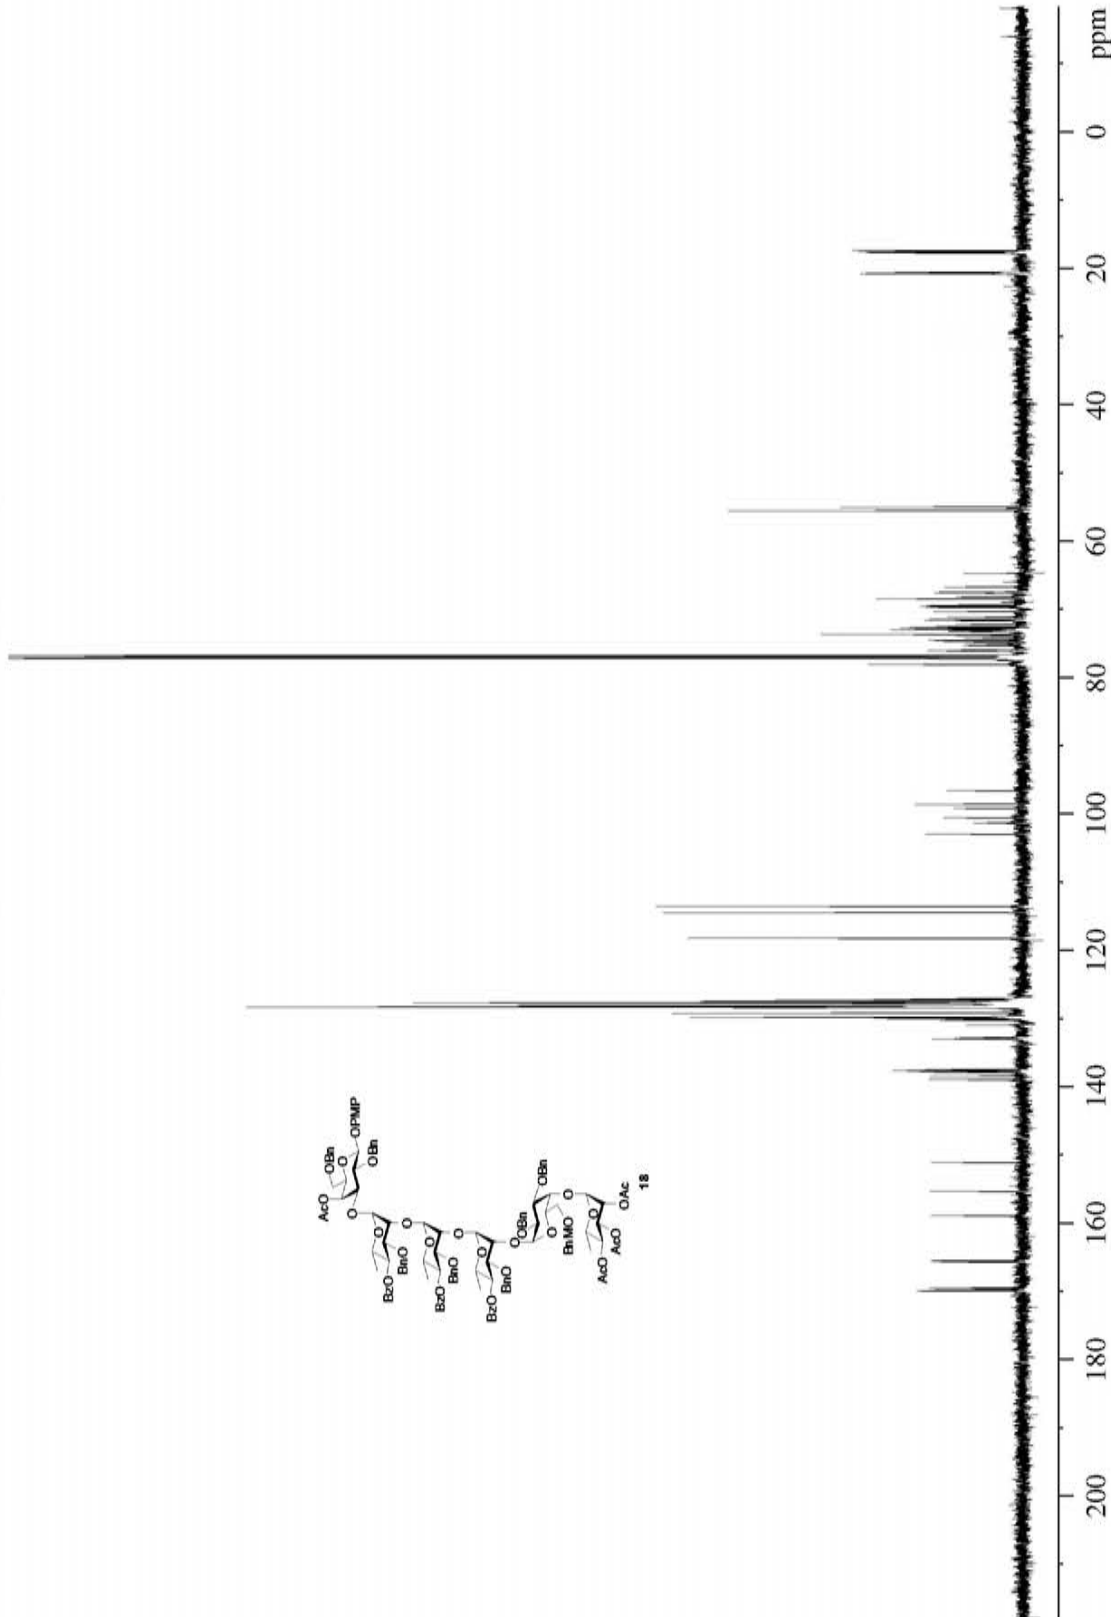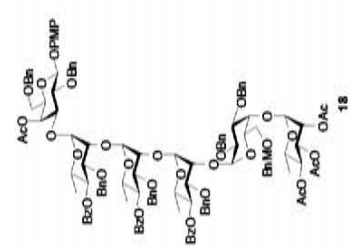

18

BM-VS-s28 in CDC13

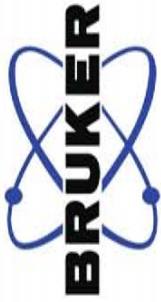

Current Data Parameters  
 NAME BM-VS-s28  
 EXPNO 12  
 PROCNO 1

F2 - Acquisition Parameters  
 Date\_ 20140315  
 Time 11.16  
 INSTRUM spect  
 PROBHD 5 mm FAPBO BB-  
 PULPROG cosygpozf  
 TD 2048  
 SOLVENT CDC13  
 NS 1  
 DS 8  
 SWH 5000.000 Hz  
 FIDRES 2.441406 Hz  
 AQ 0.2048000 sec  
 RG 36  
 LW 100.000 usec  
 DE 6.50 usec  
 TE 298.2 K  
 DO 0.00000300 sec  
 D1 1.48889198 sec  
 D13 0.00000400 sec  
 D16 0.00020000 sec  
 INU 0.00019990 sec

===== CHANNEL f1 =====  
 NUC1 1H  
 P0 14.25 usec  
 PL 14.25 usec  
 PL1 1.30 dB  
 PL1W 15.30635643 W  
 SF01 500.2325012 MHz

===== GRADIENT CHANNEL =====  
 GENAM[L] SINE.100  
 GPZ1 10.00 %  
 PL6 1000.00 usec

F1 - Acquisition parameters  
 TD 128  
 SF01 500.2325 MHz  
 FIDRES 39.080666 Hz  
 SW 10.000 ppm  
 FWHODE QF

F2 - Processing parameters  
 SI 1024  
 SF 500.2300098 MHz  
 SSB 0  
 LB 0 Hz  
 GB 0  
 PC 1.40

F1 - Processing parameters  
 SI 1024  
 MC2 OF  
 SF 500.2300144 MHz  
 SSB 0  
 LB 0 Hz  
 GB 0

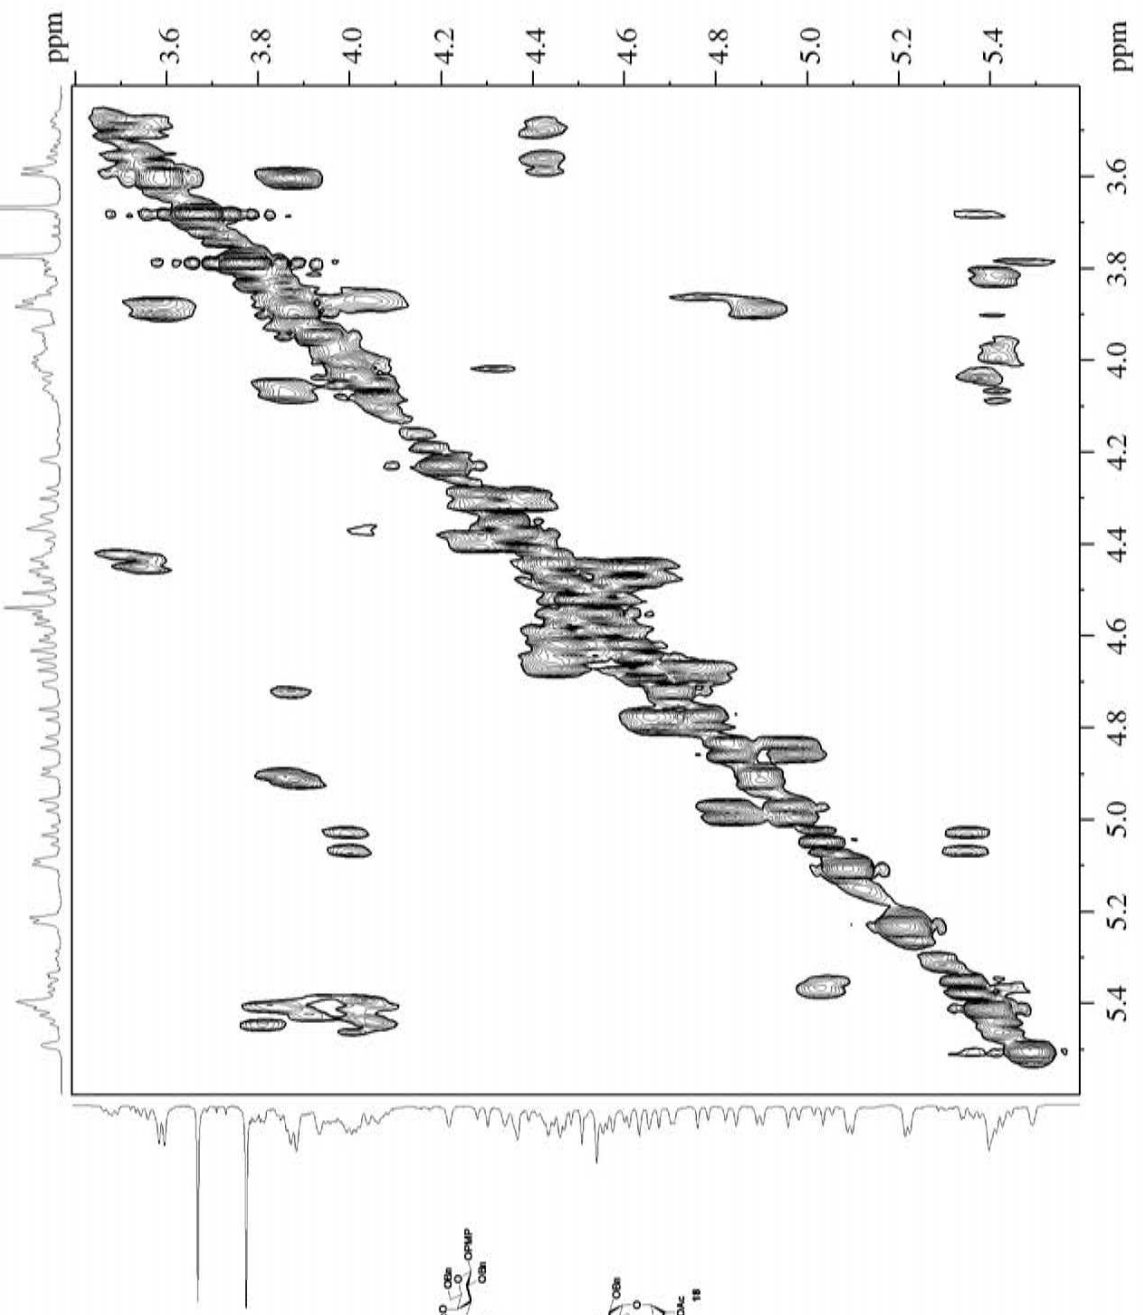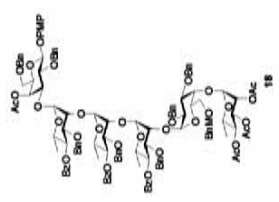

BM-VS-s28 in CDC13  
HSQC

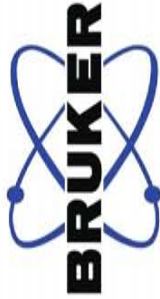

Current Data Parameters  
NAME: BM-VS-s28  
EXPNO: 13  
PROCNO: 1

F2 - Acquisition Parameters  
Date\_ 20140915  
Time: 11.21

PROBHD 5 mm pspc-1  
PULPROG waqzgpg12  
TD 1024  
SOLVENT CDC13  
DS 16  
SWH 5000.0000 Hz  
FIDRES 4.882813 Hz  
AQ 0.1024000 sec  
RG 655  
IN 180.000 usec  
DE 6.50 usec  
TE 297.8 K  
CHST2 145.000000 sec  
D3 1.50000000 sec  
D4 0.0017244 sec  
D11 0.03000000 sec  
D13 0.00000000 sec  
D14 0.00000000 sec  
D24 0.00084207 sec  
IND 0.00001395 sec  
SCOPYING

===== CHANNEL f1 =====  
NUC1 1H  
P1 14.25 usec  
PC 28.20 usec  
PL1 0.00 dB  
PL2 0.00 dB  
PL3 1.10 dB  
PL4 1.10 dB  
PL1W 15.30435443 W  
SFO1 500.2325012 MHz

===== CHANNEL f2 =====  
CPDPRG2 gcp  
NUC2 13C  
P2 5.50 usec  
PC 19.00 usec  
PL2 0.00 dB  
PL3 -0.20 dB  
PL4 -0.20 dB  
PL12 17.00 dB  
PL2W 90.1882531 W  
PL3W 1.60379910 W  
SFO2 125.7625012 MHz

===== GRADIENT CHANNEL =====  
GPRM[1] SINE.100  
GPRM[2] SINE.100  
GPRM[3] SINE.100  
GPRM[4] SINE.100  
GPRM[5] SINE.100  
GPRM[6] SINE.100  
GPRM[7] SINE.100  
GPRM[8] SINE.100  
GPRM[9] SINE.100  
GPRM[10] SINE.100  
GPRM[11] SINE.100  
GPRM[12] SINE.100  
GPRM[13] SINE.100  
GPRM[14] SINE.100  
GPRM[15] SINE.100  
GPRM[16] SINE.100  
GPRM[17] SINE.100  
GPRM[18] SINE.100  
GPRM[19] SINE.100  
GPRM[20] SINE.100

F1 - Acquisition parameters  
TD 256  
SFO1 125.7355 MHz  
SFO2 500.2325012 MHz  
FIDRES 98.277740 Hz  
SW 200.0000 PPM  
F2 - Processing parameters  
SI 1024  
SF 500.2500118 MHz  
WDW 60112  
SSB 0 Hz  
LB 0 Hz  
GB 0  
PC 1.40

F1 - Processing parameters  
SI 1024  
SF 125.7625012 MHz  
WDW 60112  
SSB 0 Hz  
LB 0 Hz  
GB 0  
PC 1.40

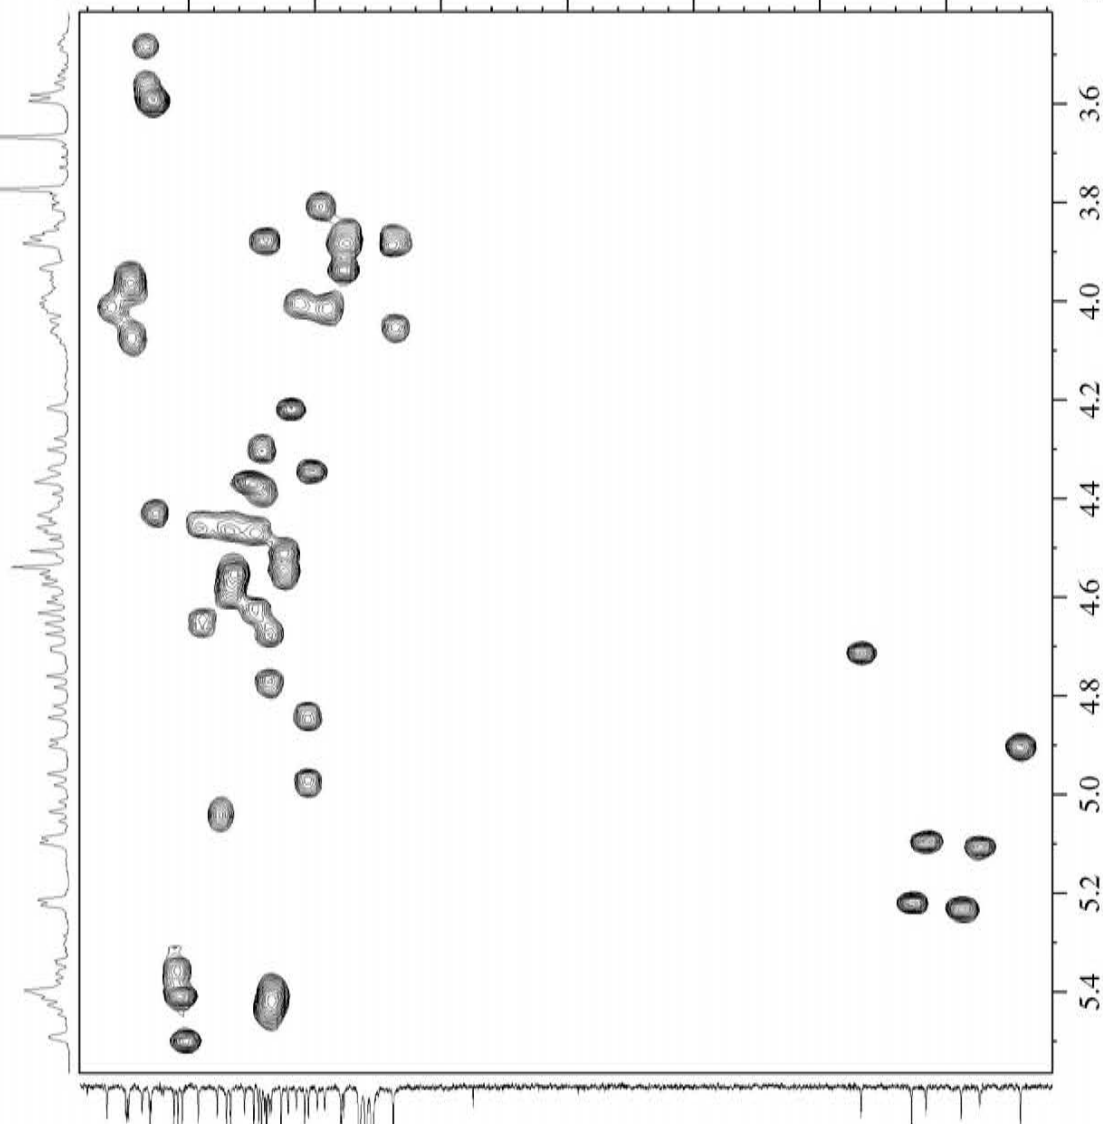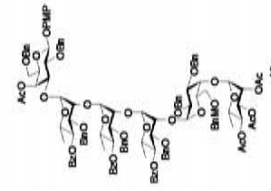

BM-VS-s29 in CDC13

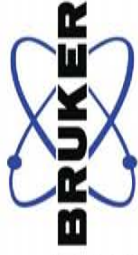

```

Current Data Parameters
NAME: BM-VS-s29
EXPNO: 70
PROCNO: 1

F2 - Acquisition Parameters
Date_: 20140917
Time: 11.13
INSTRUM: spect
PROBHD: 5 mm PABBO BR-
PULPROG: zg30
TD: 65536
SOLVENT: CDC13
NS: 16
DS: 2
SWH: 10330.578 Hz
FIDRES: 0.157622 Hz
AQ: 3.1719425 sec
RG: 45.2
LW: 48.400 usec
DE: 8.50 usec
TE: 297.6 K
D1: 1.00000000 sec
TD0: 1

===== CHANNEL f1 =====
NUC1: 1H
P1: 14.25 usec
PL1: 1.30 dB
PL12: 15.30635643 M
SFO1: 500.2330891 MHz

F2 - Processing parameters
SI: 32768
SF: 500.2300152 MHz
WDW: EM
SSB: 0
LB: 0.30 Hz
GB: 0
PC: 1.00
    
```

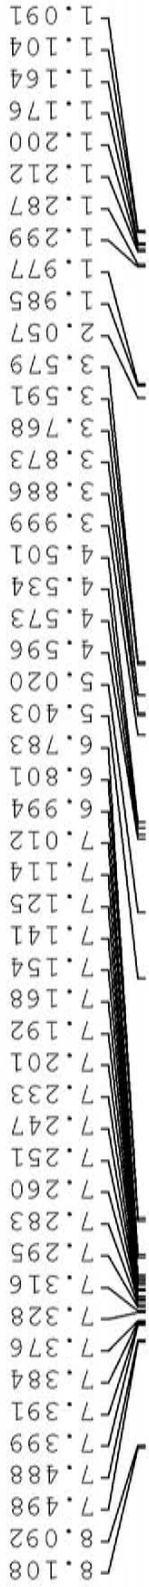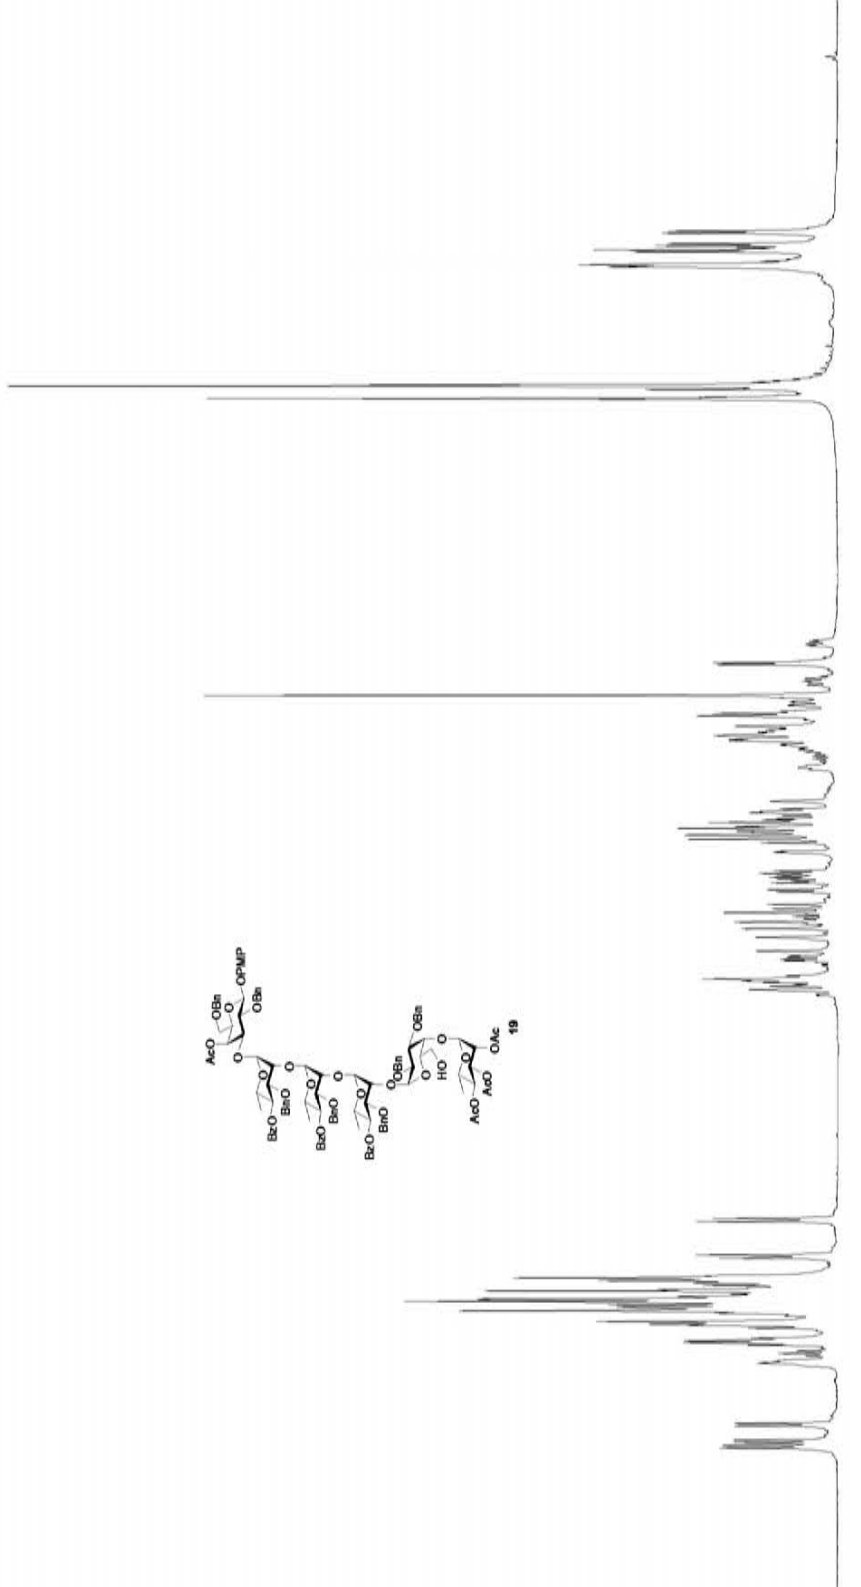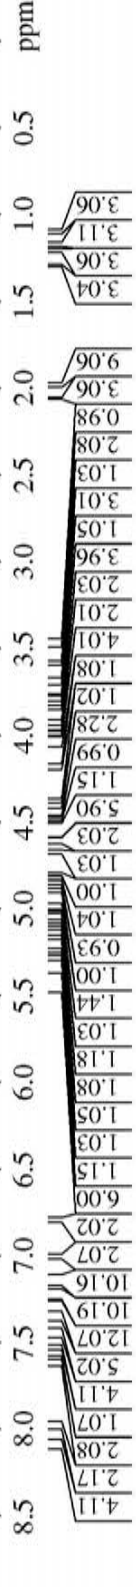

BM-VS-s29 in CDC13

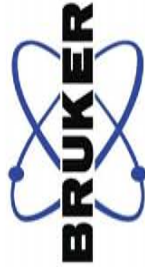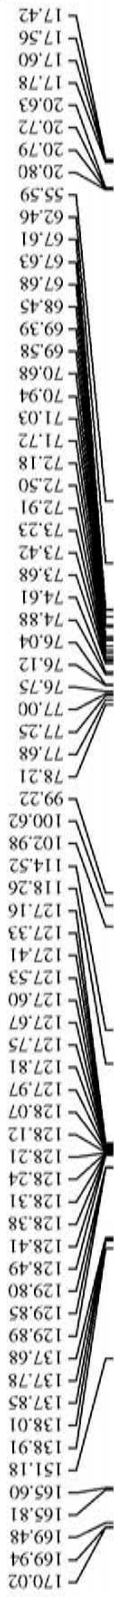

Current Data Parameters  
 NAME BM-VS-s29  
 EXENO 90  
 PROCNO 1

F2 - Acquisition Parameters  
 Date\_ 20140917  
 Time 12.26  
 INSTRUM spect  
 PROBH 5 mm PARBO BB-  
 PULPROG zgpg  
 ID 65536  
 SOLVENT CDC13  
 NS 1147  
 DS 4  
 SWH 29761.904 Hz  
 FIDRES 0.454131 Hz  
 AQ 1.1010048 sec  
 RG 203  
 DW 16.800 usec  
 DE 6.50 usec  
 TE 300.1 K  
 D1 2.00000000 sec  
 D11 0.03000000 sec  
 TD0 1

===== CHANNEL f1 =====  
 NUC1 13C  
 P1 9.50 usec  
 PL1 -0.50 dB  
 PL1W 90.18825531 W  
 SF01 125.7955118 MHz

===== CHANNEL f2 =====  
 CPDPRG2 waitz16  
 NUC2 1H  
 PCED2 80.00 usec  
 PL2 1.30 dB  
 PL2W 15.30635643 W  
 PL2W 0.51866696 W  
 SF02 500.2320009 MHz

F2 - Processing Parameters  
 SI 32768  
 SF 125.7829417 MHz  
 WDW EM  
 SSB 0  
 LB 1.00 Hz  
 GB 0  
 PC 1.40

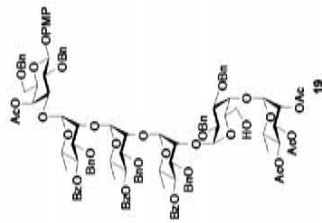

170 160 150 140 130 120 110 100 90 80 70 60 50 40 30 20 10 ppm

BM-VS-s29 in CDC13

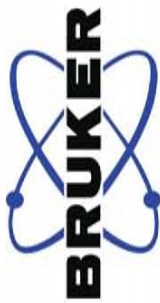

Current Data Parameters  
 NAME BM-VS-s29  
 EXENO 71  
 PROCNO 1

F2 - Acquisition Parameters  
 Date 20140917  
 Time 11.15  
 INSTRUM spect  
 PROBRD 5 mm PABBO BB-  
 PULPROG cosy3Df  
 ID 2048  
 SOLVENT CDC13  
 NS 1  
 DS 8  
 SWH 5000.000 Hz  
 FIDRES 2.441406 Hz  
 AQ 0.2048000 sec  
 RG 45.2  
 DW 100.000 usec  
 DE 6.50 usec  
 TE 297.6 K  
 D0 0.00000300 sec  
 D1 1.48683198 sec  
 D13 0.00000400 sec  
 D16 0.00020000 sec  
 INO 0.00019990 sec

===== CHANNEL f1 =====  
 NUC1 1H  
 P0 14.25 usec  
 P1 14.25 usec  
 PL1 1.30 dB  
 PL1W 15.30635643 W  
 SF01 500.2325012 MHz

===== GRADIENT CHANNEL =====  
 GPRAM[1] SINE.100  
 GPZ1 10.00 %  
 P16 1000.00 usec

F1 - Acquisition parameters  
 TD 128  
 SF01 500.2325 MHz  
 FIDRES 39.080666 Hz  
 SW 10.000 PPM  
 FTMODE QF

F2 - Processing parameters  
 SI 1024  
 SF 500.2300108 MHz  
 SINE  
 WDW 0  
 SSB 0 Hz  
 LB 0  
 GB 0  
 PC 1.00

F1 - Processing parameters  
 SI 1024  
 MC2 QF  
 SF 500.2300104 MHz  
 WDW SINE  
 SSB 0 Hz  
 LB 0  
 GB 0

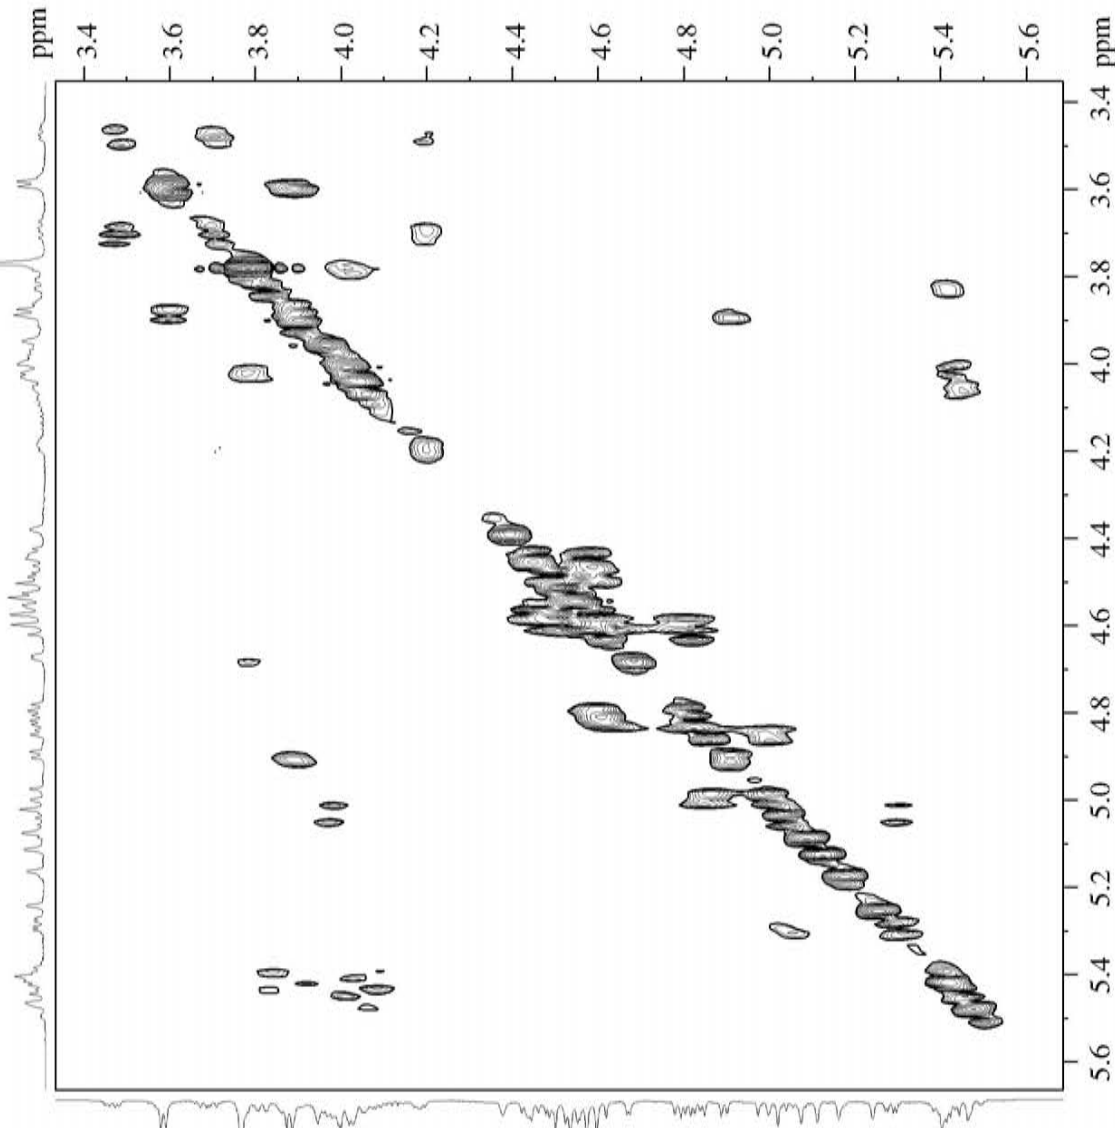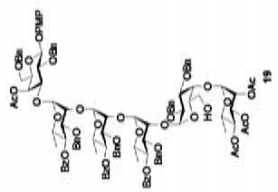

BM-VS-s29 in CDC13  
 HSQCGP

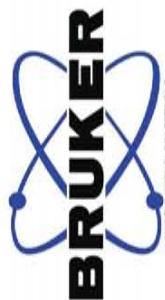

NAME BM-VS-s29  
 EXPNO 110  
 PROCNO 1

F2 - Acquisition Parameters

Date\_ 20140917  
 Time 14.24  
 INSTRUM spect  
 PULPROG zgpg30  
 F2PROG zgpg30  
 TO 1024  
 SOLVENT CDC13  
 NS 2  
 DS 2  
 SWH 5000.000 Hz  
 FIDRES 4.882813 Hz  
 AQ 0.1024000 sec  
 RG 45.2  
 DE 100.000 umsec  
 TE 300.1 K  
 CNST2 145.0000000  
 DD 0.0000300 sec  
 D1 0.0017284 sec  
 D4 0.0300000 sec  
 D11 0.0300000 sec  
 D13 0.0000400 sec  
 D18 0.0002000 sec  
 D19 0.0002000 sec  
 INO 0.0001985 sec

===== CHANNEL f1 =====

NUC1 13  
 P1 14.25 umsec  
 P2 28.50 umsec  
 P3 0.10 umsec  
 PL1 0.00 dB  
 PL2 15.3043542 dB  
 PL3 500.2325012 MHz

===== CHANNEL f2 =====

CPDPRG2 zgpg30  
 NUC2 13C  
 P1 9.50 umsec  
 P2 17.00 umsec  
 P3 70.00 umsec  
 PL1 0.00 dB  
 PL2 17.00 dB  
 PL3 90.18825531 dB  
 PL4 1.69373910 dB  
 PL5 125.7955123 MHz

===== GRADIENT CHANNEL =====

GPMAX[1] 5.00  
 GPMAX[2] 5.00  
 GPMAX[3] 5.00  
 GPMAX[4] 5.00  
 GRP1 80.00 %  
 GR2 20.10 %  
 GR3 11.00 %  
 GR4 5.00 %  
 P13 1000.00 umsec  
 P14 600.00 umsec

F1 - Acquisition Parameters

PROBHD 5mm QNP1H  
 X301 125.7845 MHz  
 F1FRES 98.277740 Hz  
 SW 200.0000000 ppm  
 FWD08 Echo-Anticcho

F2 - Processing parameters

SI 1024  
 SF 500.2300173 MHz  
 GB 0 Hz  
 AS 0 Hz  
 Z 1  
 PC 1.00

F1 - Processing parameters

SI 1024  
 MK2 echo-antico  
 SF 125.7829403 MHz  
 GB 0 Hz  
 AS 0 Hz  
 Z 0

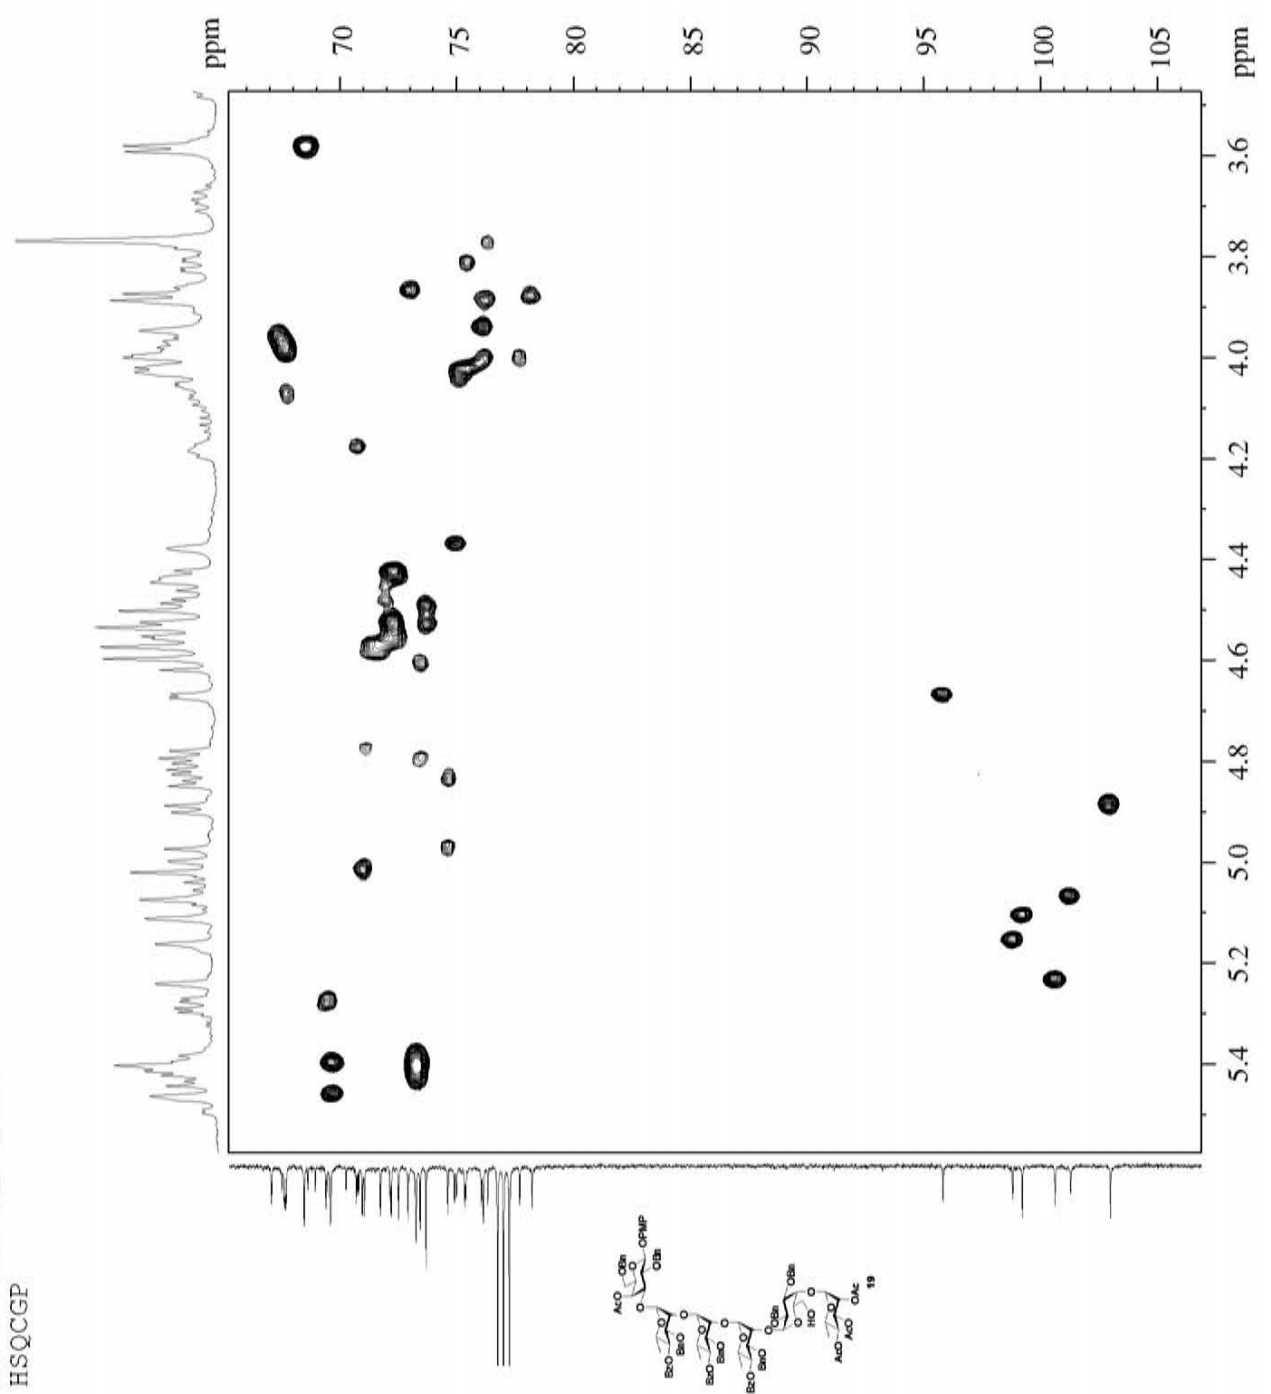

BM-VS-hf in MeOD

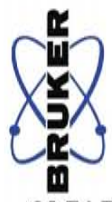

6.751  
6.732  
6.704  
6.686  
5.260  
5.208  
5.159  
5.114  
5.085  
4.029  
4.016  
4.011  
3.913  
3.801  
3.795  
3.786  
3.782  
3.776  
3.768  
3.763  
3.750  
3.738  
3.731  
3.720  
3.706  
3.697  
3.686  
3.673  
3.668  
3.662  
3.657  
3.647  
3.644  
3.638  
3.638  
3.613  
3.310  
3.307  
1.280  
1.270  
1.268  
1.257  
1.256  
1.247  
1.243

Current Data Parameters  
 NAME BM-VS-Hf  
 EXPNO 1  
 PROCNO 1  
 F2 - Acquisition Parameters  
 Date\_ 20141117  
 Time 13:05:13  
 INSTRUM spect  
 PROBRD 5 mm PABBO ZB-  
 PULPROG zgpg30  
 TD 65536  
 SOLVENT MeOD  
 NS 49  
 DS 4  
 SWH 10330.578 Hz  
 FIDRES 0.1576332 Hz  
 AQ 3.1719425 sec  
 SFO1 500.1360610 MHz  
 DW 49.400 usec  
 DE 6.50 usec  
 TE 300.2 K  
 D1 1.00000000 sec  
 TDO 1

\*\*\*\*\* CHANNEL f1 \*\*\*\*\*  
 NUC1 1H  
 P1 14.25 usec  
 PL1 0 dB  
 FWH 15.3661150 dB  
 SFO1 500.1360610 MHz

F2 - Processing Parameters  
 SI 32768  
 SF 500.1360610 MHz  
 WDW EM  
 SSF 0  
 LB 0.30 Hz  
 GB 0  
 PC 1.00

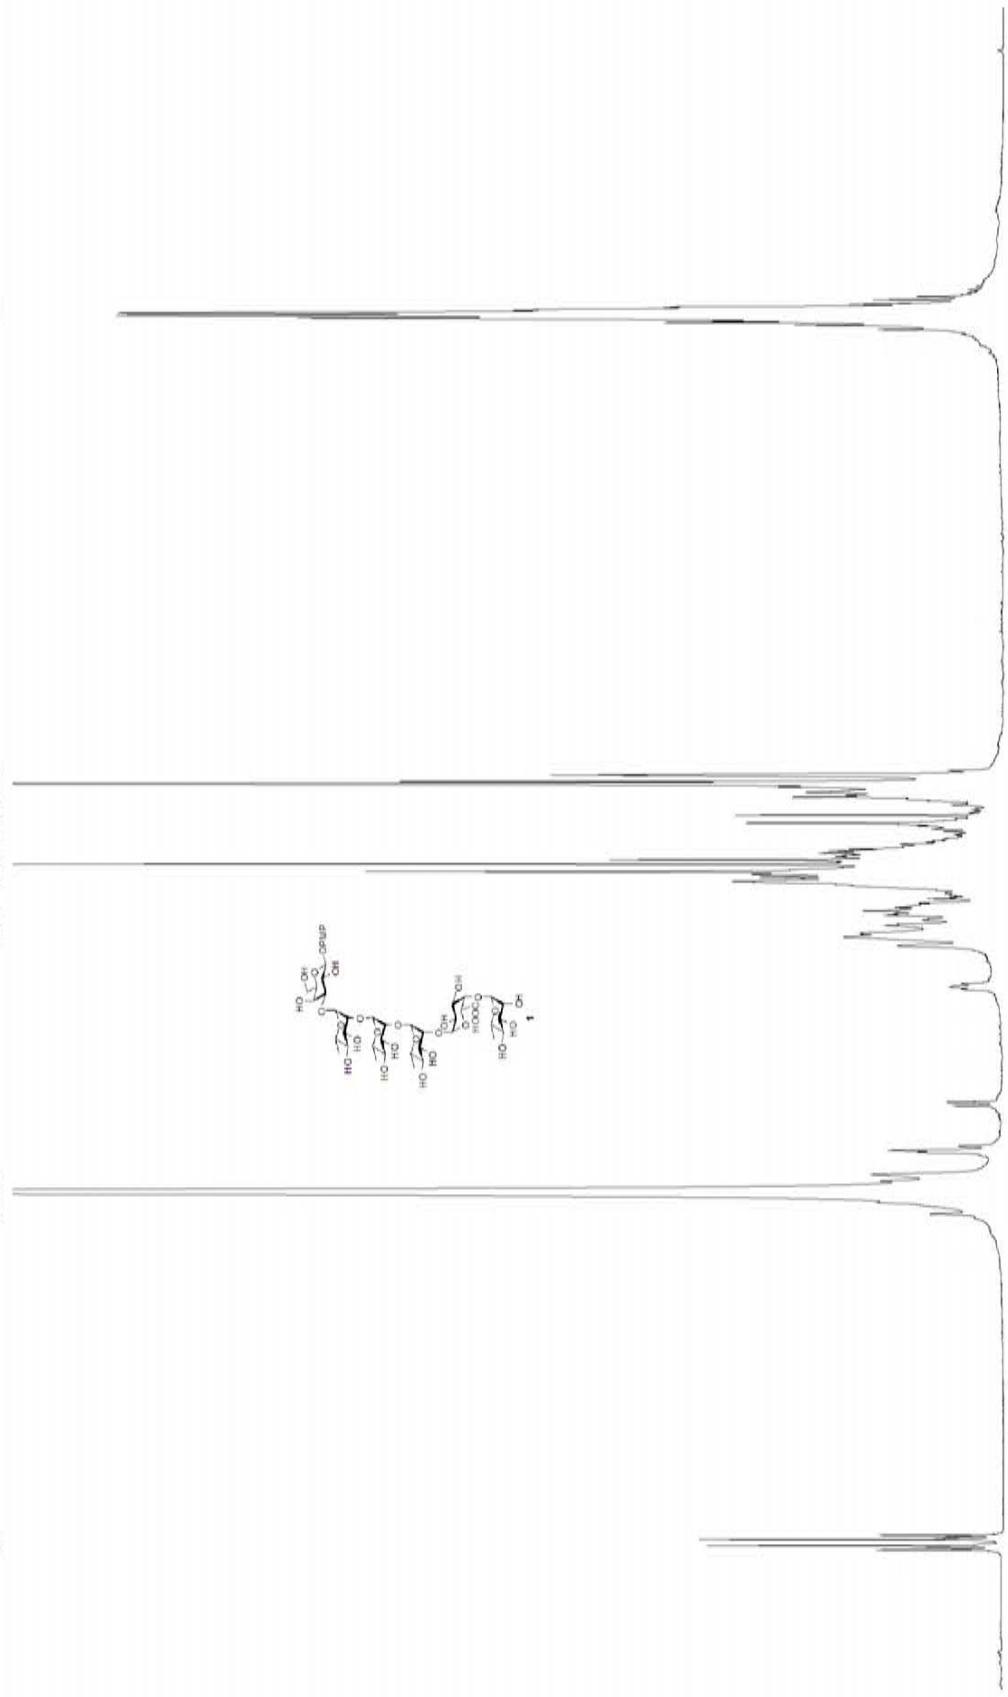

7.0 6.5 6.0 5.5 5.0 4.5 4.0 3.5 3.0 2.5 2.0 1.5 1.0 0.5 ppm



BM-VS-hf in MeOD

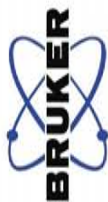

173.39  
156.54  
152.14

116.75  
115.69  
103.34  
102.70  
102.62  
102.38  
102.27  
101.17  
80.04  
79.75  
78.25  
77.73  
76.61  
76.41  
74.88  
74.38  
74.25  
73.90  
73.72  
73.55  
72.34  
72.23  
72.14  
72.09  
71.93  
71.78  
70.50  
70.48  
70.28  
70.15  
69.53  
63.90  
63.21  
56.16  
49.85  
49.51  
49.46  
49.34  
49.17  
49.00  
48.83  
48.66  
48.49  
18.14  
18.01  
17.96  
17.92

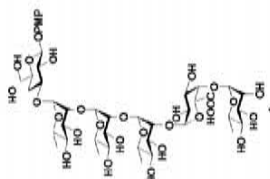

Current Data Parameters  
NAME BM-VS-hf  
PROCNO 211  
F2 - Acquisition Parameters  
Date\_ 201111  
Time\_ 10.00  
INSTRUM spect  
PROBHD 5 mm F4001 BE-  
TD1PROB 65356  
SOLVENT MeOD  
NS 18779  
DS 2  
SWH 20761.004 Hz  
FIDRES 0.454131 Hz  
AQ 1.1010018 sec  
RG 327.5  
WDW EM  
SS 16.300 uSAC  
SB 6.50 uSAC  
BE 2.0000000 K  
D11 0.05000000 sec  
TD0 1  
----- CHANNEL f1 -----  
NUC1 13C  
P1 9.50 uSAC  
PL1 0.00 dB  
FLW 30.1832553 W  
SF01 125.7625118 MHz  
----- CHANNEL f2 -----  
C13CPROG2 waltz16  
NUC2 13C  
P2 1.00 uSAC  
PL2 0.00 dB  
FL2 16.00 W  
FLN 15-30635643 W  
FLM 15-31181609 W  
SF02 500.135099 MHz  
F2 - Processing parameters  
SI 327.5  
SF 125.7625118 MHz  
WDW EM  
SSB 0  
GB 0  
PC 1.40

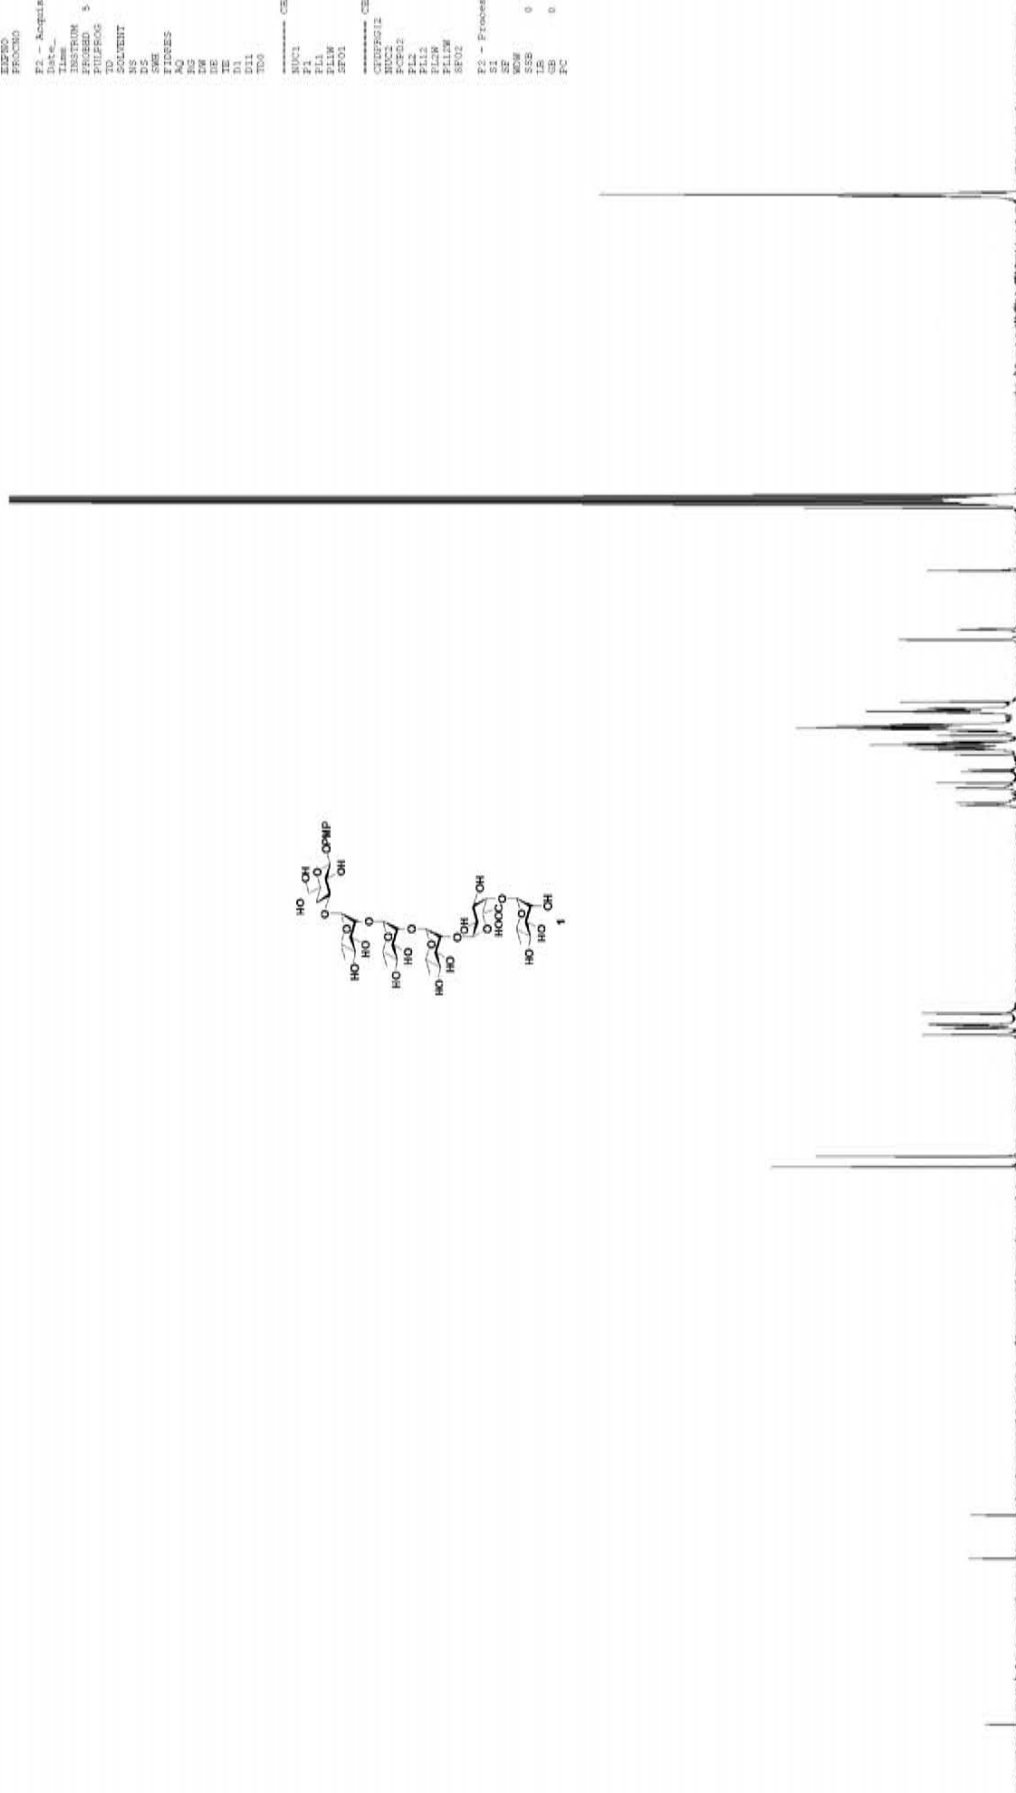

170 160 150 140 130 120 110 100 90 80 70 60 50 40 30 20 10 ppm
